# Supplementary material for: Estimation of the incidence of invasive meningococcal disease using a capture–recapture model based on two independent surveillance systems in Catalonia, Spain
Source: PubMed Central journal article supplement — BMJ Open. 2022 Jun 21;12(6):e058003. doi: 10.1136/bmjopen-2021-058003 (PMC9214402; doi:10.1136/bmjopen-2021-058003), 2022-06-21
Supplement: bmjopen-2021-058003.draft_revisions.pdf [file bmjopen-2021-058003.draft_revisions.pdf]

# BMJ Open

BMJ Open is committed to open peer review. As part of this commitment we make the peer review history of every article we publish publicly available.

When an article is published we post the peer reviewers' comments and the authors' responses online. We also post the versions of the paper that were used during peer review. These are the versions that the peer review comments apply to.

The versions of the paper that follow are the versions that were submitted during the peer review process. They are not the versions of record or the final published versions. They should not be cited or distributed as the published version of this manuscript.

BMJ Open is an open access journal and the full, final, typeset and author-corrected version of record of the manuscript is available on our site with no access controls, subscription charges or pay-per-view fees (<http://bmjopen.bmj.com>).

If you have any questions on BMJ Open's open peer review process please email [info.bmjopen@bmj.com](mailto:info.bmjopen@bmj.com)

# BMJ Open

## Estimation of the incidence of invasive meningococcal disease using a capture-recapture model based on two independent surveillance systems

|                               |                                                                                                                                                                                                                                                                                                                                                                                                                                                                                                                                                                                                                                       |
|-------------------------------|---------------------------------------------------------------------------------------------------------------------------------------------------------------------------------------------------------------------------------------------------------------------------------------------------------------------------------------------------------------------------------------------------------------------------------------------------------------------------------------------------------------------------------------------------------------------------------------------------------------------------------------|
| Journal:                      | <i>BMJ Open</i>                                                                                                                                                                                                                                                                                                                                                                                                                                                                                                                                                                                                                       |
| Manuscript ID                 | bmjopen-2021-058003                                                                                                                                                                                                                                                                                                                                                                                                                                                                                                                                                                                                                   |
| Article Type:                 | Original research                                                                                                                                                                                                                                                                                                                                                                                                                                                                                                                                                                                                                     |
| Date Submitted by the Author: | 14-Oct-2021                                                                                                                                                                                                                                                                                                                                                                                                                                                                                                                                                                                                                           |
| Complete List of Authors:     | Ciruela, Pilar; Public Health Agency of Catalonia; CIBERESP<br>Vilaró, Marta; Universitat de Barcelona, Departament de Medicina;<br>CIBERESP, Epidemiology and Public Health<br>Carmona, Gloria; Public Health Agency of Catalonia<br>Jané, Mireia; Public Health Agency of Catalonia, Public Health<br>Surveillance<br>Soldevila, Núria; CIBERESP; Universitat de Barcelona, Departament de<br>Medicina<br>García, Tomás; Generalitat de Catalunya<br>Hernández, Sergi; Generalitat de Catalunya<br>Ruiz, Laura; Generalitat de Catalunya<br>Dominguez, Angela; CIBERESP, Epidemiologia y Salud Publica;<br>Universitat de Barcelona |
| Keywords:                     | Diagnostic microbiology < INFECTIOUS DISEASES, Epidemiology < INFECTIOUS DISEASES, Molecular diagnostics < INFECTIOUS DISEASES, Infection control < INFECTIOUS DISEASES                                                                                                                                                                                                                                                                                                                                                                                                                                                               |
|                               |                                                                                                                                                                                                                                                                                                                                                                                                                                                                                                                                                                                                                                       |

SCHOLARONE™  
Manuscripts

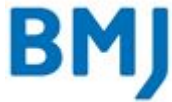

I, the Submitting Author has the right to grant and does grant on behalf of all authors of the Work (as defined in the below author licence), an exclusive licence and/or a non-exclusive licence for contributions from authors who are: i) UK Crown employees; ii) where BMJ has agreed a CC-BY licence shall apply, and/or iii) in accordance with the terms applicable for US Federal Government officers or employees acting as part of their official duties; on a worldwide, perpetual, irrevocable, royalty-free basis to BMJ Publishing Group Ltd ("BMJ") its licensees and where the relevant Journal is co-owned by BMJ to the co-owners of the Journal, to publish the Work in this journal and any other BMJ products and to exploit all rights, as set out in our [licence](#).

The Submitting Author accepts and understands that any supply made under these terms is made by BMJ to the Submitting Author unless you are acting as an employee on behalf of your employer or a postgraduate student of an affiliated institution which is paying any applicable article publishing charge ("APC") for Open Access articles. Where the Submitting Author wishes to make the Work available on an Open Access basis (and intends to pay the relevant APC), the terms of reuse of such Open Access shall be governed by a Creative Commons licence – details of these licences and which [Creative Commons](#) licence will apply to this Work are set out in our licence referred to above.

Other than as permitted in any relevant BMJ Author's Self Archiving Policies, I confirm this Work has not been accepted for publication elsewhere, is not being considered for publication elsewhere and does not duplicate material already published. I confirm all authors consent to publication of this Work and authorise the granting of this licence.

1  
2  
3 1 **Estimation of the incidence of invasive meningococcal disease using a capture-recapture**  
4  
5 2 **model based on two independent surveillance systems**  
6  
7

8 3  
9  
10 4 Pilar Ciruela,<sup>1,2\*</sup> Marta Vilaró,<sup>2,3</sup> Gloria Carmona,<sup>1</sup> Mireia Jané,<sup>1,2,3</sup> Núria Soldevila,<sup>2,3</sup> Tomás  
11  
12 5 Garcia,<sup>1</sup> Sergi Hernández,<sup>1</sup> Laura Ruiz,<sup>1</sup> Angela Domínguez,<sup>2,3</sup> Working Group of the  
13  
14 6 Microbiological Reporting System of Catalonia and Working Group of the Epidemiological  
15  
16 7 Surveillance Network of Catalonia  
17  
18

19 8  
20  
21 9 <sup>1</sup> Public Health Agency of Catalonia (ASPCAT), Barcelona, Spain

22  
23 10 <sup>2</sup> CIBER Epidemiología y Salud Pública (CIBERESP), Madrid, Spain

24  
25 11 <sup>3</sup> Departament de Medicina, Universitat de Barcelona  
26  
27

28 12

29 13

30 14

31 15

32 16 **Corresponding author:**

33 17 Pilar Ciruela

34 18 [pilar.ciruela@gencat.cat](mailto:pilar.ciruela@gencat.cat)

35 19 Roc Boronat, 81-95

36 20 08005 Barcelona, Spain

37 21 Phone: +34935513680  
38  
39

40 22

41 23

42 24

43 25

44 26

45 27  
46  
47  
48  
49  
50  
51  
52  
53  
54  
55  
56  
57  
58  
59  
60

1  
2  
3 28 Pilar Ciruela<sup>1,2</sup>  
4  
5 29 <sup>1</sup> Agència de Salut Pública de Catalunya, Generalitat de Catalunya  
6  
7 30 C/ Roc Boronat, 81-95  
8  
9 31 08005 Barcelona, Spain  
10  
11 32 <sup>2</sup> CIBER de Epidemiología y Salud Pública (CIBERESP)  
12  
13 33 Instituto de Salud Carlos III  
14  
15 34 C/ Monforte de Lemos, 3-5  
16  
17 35 28029 Madrid, Spain  
18  
19 36 [pilar.ciruela@gencat.cat](mailto:pilar.ciruela@gencat.cat)  
20  
21  
22 37  
23  
24 38  
25  
26 39 Marta Vilaró<sup>2,3</sup>  
27  
28 40 <sup>2</sup>Departament de Medicina, Universitat de Barcelona  
29  
30 41 C/ Casanova, 143  
31  
32 42 08036 Barcelona, Spain  
33  
34 43 <sup>3</sup>CIBER de Epidemiología y Salud Pública (CIBERESP)  
35  
36 44 Instituto de Salud Carlos III  
37  
38 45 C/ Monforte de Lemos, 3-5  
39  
40 46 28029 Madrid, Spain  
41  
42 47 [marta.vilarpa@gmail.com](mailto:marta.vilarpa@gmail.com)  
43  
44  
45 48  
46  
47 49 Gloria Carmona  
48  
49 50 Agència de Salut Pública de Catalunya, Generalitat de Catalunya  
50  
51 51 C/ Roc Boronat, 81-95  
52  
53 52 08005 Barcelona, Spain  
54  
55 53 [gloria.carmona@gencat.cat](mailto:gloria.carmona@gencat.cat)  
56  
57  
58 54  
59  
60 55

1  
2  
3 56 Mireia Jané<sup>1,2</sup>  
4  
5 57 <sup>1</sup> Agència de Salut Pública de Catalunya, Generalitat de Catalunya  
6  
7 58 C/ Roc Boronat, 81-95  
8  
9 59 08005 Barcelona, Spain  
10  
11 60 <sup>2</sup> CIBER de Epidemiología y Salud Pública (CIBERESP)  
12  
13 61 Instituto de Salud Carlos III  
14  
15 62 C/ Monforte de Lemos, 3-5  
16  
17 63 28029 Madrid, Spain  
18  
19 64 [mireia.jane@gencat.cat](mailto:mireia.jane@gencat.cat)  
20  
21  
22 65  
23  
24 66 Núria Soldevila<sup>2,3</sup>  
25  
26 67 <sup>2</sup> Departament de Medicina, Universitat de Barcelona  
27  
28 68 C/ Casanova, 143  
29  
30 69 08036 Barcelona, Spain  
31  
32 70 <sup>3</sup> CIBER de Epidemiología y Salud Pública (CIBERESP)  
33  
34 71 Instituto de Salud Carlos III  
35  
36 72 C/ Monforte de Lemos, 3-5  
37  
38 73 28029 Madrid, Spain  
39  
40 74 [nsoldevila@ub.edu](mailto:nsoldevila@ub.edu)  
41  
42  
43 75  
44  
45 76 Tomás Garcia  
46  
47 77 Agència de Salut Pública de Catalunya, Generalitat de Catalunya  
48  
49 78 C/ Roc Boronat, 81-95  
50  
51 79 08005 Barcelona, Spain  
52  
53 80 [tgarala@alumnes.ub.edu](mailto:tgarala@alumnes.ub.edu)  
54  
55  
56 81  
57  
58 82 Sergi Hernández  
59  
60 83 Agència de Salut Pública de Catalunya, Generalitat de Catalunya

1  
2  
3 84 C/ Roc Boronat, 81-95  
4  
5 85 08005 Barcelona, Spain  
6  
7 86 [snmc@gencat.cat](mailto:snmc@gencat.cat)  
8  
9 87  
10  
11 88 Laura Ruiz  
12  
13 89 Agència de Salut Pública de Catalunya, Generalitat de Catalunya  
14  
15 90 C/ Roc Boronat, 81-95  
16  
17 91 08005 Barcelona, Spain  
18  
19 92 [laura.ruiz\\_ext@gencat.cat](mailto:laura.ruiz_ext@gencat.cat)  
20  
21  
22 93  
23  
24 94 Angela Domínguez<sup>2,3</sup>  
25  
26 95 <sup>2</sup>Departament de Medicina, Universitat de Barcelona  
27  
28 96 C/ Casanova, 143  
29  
30 97 08036 Barcelona, Spain  
31  
32 98 <sup>3</sup>CIBER de Epidemiología y Salud Pública (CIBERESP)  
33  
34 99 Instituto de Salud Carlos III  
35  
36 100 C/ Monforte de Lemos, 3-5  
37  
38 101 28029 Madrid, Spain  
39  
40 102 [angela.dominguez@ub.edu](mailto:angela.dominguez@ub.edu)  
41  
42  
43 103  
44  
45 104  
46  
47 105  
48  
49 106  
50  
51 107  
52  
53 108  
54  
55 109  
56  
57 110  
58  
59 111  
60

## 112 **ABSTRACT**

113 **Objectives:** Invasive meningococcal disease (IMD) is an urgent notifiable disease and its early  
114 notification is essential to prevent cases. The objective of the study was to assess the sensitivity  
115 of two independent surveillance systems, the statutory disease reporting system (SDR) and the  
116 microbiological reporting system (MRS), and to estimate the incidence of IMD.

117 **Settings:** The study was performed in Catalonia, Spain, between 2011 and 2015. The variables  
118 collected were age, sex, year of report, size of municipality (< 10,000 and  $\geq$  10,000), clinical  
119 form, death, serogroup, country of birth and type of reporting centre (private and public). The  
120 capture-recapture analysis and 95% confidence intervals were calculated using the Chapman  
121 formula. Multinomial logistic regression was performed for adjusted estimation.

122 **Results:** The sensitivity of the two combined surveillance systems was 88.5% (85.0-92.0). SDR  
123 had greater sensitivity than the MRS (67.9%; 62.7-73.1 vs. 64.7%; 59.4-70.0). In 2014-2015, the  
124 sensitivity of both systems was higher (80.6%; 73.2-87.9 vs. 73.4%; 65.2-81.6) than in 2011-  
125 2013 (59.3%; 52.6-66.0 vs. 58.3%; 51.6-65.1). In private centres, the sensitivity was higher for  
126 SDR than for MRS (100%; 100-100 vs. 4.8%; -4.4-13.9). The adjusted estimate of cases was  
127 lower than that obtained using the Chapman formula (279; 266-296 vs. 313; 295-330). The  
128 estimated adjusted incidence of IMD was 0.7/100,000 persons-year.

129 **Conclusions:** The sensitivity of enhanced surveillance through the combination of two  
130 complementary sources was higher than for the sources individually. Factors associated with  
131 under-reporting in different systems should be analysed to improve IMD surveillance.

132

### 133 **Keywords:**

134 Meningococcal disease, Capture-recapture, estimated incidence, surveillance systems.

135

### 136 **Strengths and limitations of this study**

137

138 1. Early notification of Invasive meningococcal disease is essential to prevent cases.



1  
2  
3 139 2. Statutory disease reporting system had greater sensitivity than Microbiological reporting  
4  
5 140 system.

6  
7 141 3. Two surveillance sources was higher sensitivity than sources individually.

8  
9 142 4. Factors associated with under-reporting should be analysed for invasive pneumococcal  
10  
11 143 disease surveillance.

12  
13 144

14  
15 145

16  
17 146 **BACKGROUND**

18  
19 147 Invasive meningococcal disease (IMD) continues to be an important cause of morbidity and  
20  
21 148 mortality, mainly in children aged < 4 years and adolescents. [1]

22  
23 149 In the European regions, the incidence rate of confirmed IMD cases is around 0.6/100,000

24  
25 150 persons, [2] similar to Spain (0.58/100,000 persons). [3] The highest incidence is for

26  
27 151 meningococcal serogroup B, accounting for 51.5% of confirmed IMD cases. The case fatality

28  
29 152 rate is around 10-15% [3, 4] and long-term sequelae occur in 10-20% of cases. [5]

30  
31 153 IMD is an urgent notifiable disease and its early notification is essential to provide an adequate

32  
33 154 public health response in patients and their close contacts to prevent further cases.

34  
35 155 Epidemiological surveillance allows monitoring of the impact of public health interventions,

36  
37 156 including vaccination programmes. Therefore, a robust epidemiological and microbiological

38  
39 157 system with timely and accurate surveillance providing information on the frequency of cases

40  
41 158 and the distribution of circulating serogroups is crucial.

42  
43  
44 159

45  
46 160 Evaluations of surveillance systems should be conducted regularly to increase their utility. [6-8]

47  
48 161 There are two reporting systems for the epidemiological surveillance of communicable disease

49  
50 162 in Catalonia: the statutory disease reporting system (SDR) and the microbiological reporting

51  
52 163 system (MRS). [9]

53  
54  
55 164

56  
57 165 The capture-recapture method is a statistical method for estimating the real incidence of

58  
59 166 diseases in a population with two or more information sources. [10, 11] The method is valid if

60

1  
2  
3 167 four conditions are met: 1) the population under study has to be closed, i.e., there should be no  
4  
5 168 changes during the study period; 2) there must be a method of determining whether an  
6  
7 169 individual identified by one source is the same as an individual identified by the other; 3) each  
8  
9 170 individual must have the same probability of being captured by either system; 4) the systems  
10  
11 171 must be independent.  
12

13  
14 172

15  
16 173 The aim of this study was to assess the sensitivity of the two surveillance systems in Catalonia  
17  
18 174 (SDR and MRS) using the capture-recapture method and to estimate the incidence of IMD.  
19

20 175

## 21 176 **METHODS**

### 22 177 **Information sources**

23  
24  
25  
26 178 Catalonia is a region in the northeast of Spain with a population of 7,508,106 in 2015. [12]  
27

28 179 The SDR is a passive surveillance system through which health professionals declare all  
29  
30 180 infectious diseases subject to surveillance. The reporting of cases to the Public Health Agency  
31  
32 181 of Catalonia (PHAC) is mandatory and includes confirmed cases of IMD and is regulated by a  
33  
34 182 Decree. [9, 13]  
35

36  
37 183

38  
39 184 The MRS is a surveillance system that consists of microbiologists notifying laboratory  
40  
41 185 confirmed microorganisms that cause infectious diseases. The main objectives of the MRS are  
42  
43 186 to confirm suspected cases of infectious diseases through the identification of the  
44  
45 187 microorganisms and serogroups involved and to determine trends and changes in  
46  
47 188 epidemiological patterns and microbiological resistance. [14]  
48

49 189 The MRS was non-compulsory until 2015 and involved 50 health care centres representing over  
50  
51 190 83% of acute hospital beds. [15] Confirmed IMD cases were reported by microbiologists  
52  
53 191 including sex, age, clinical presentation, serogroup and diagnostic method.  
54

55  
56 192

57  
58 193 Both systems belong to the PHAC epidemiological surveillance network and, since 2014,  
59  
60 194 transfer information automatically, but the independence of the sources is maintained.

195

**Cases definition, inclusion, and exclusion criteria**

A confirmed case of IMD was defined as laboratory confirmed if at least one of the following criteria was fulfilled: isolation in cultures or detection of *Neisseria meningitidis* DNA by PCR in a normally sterile site, detection of gram-negative diplococci or *N. meningitidis* antigen in cerebrospinal fluid.

201

**Data collection**

We made a retrospective study of confirmed IMD cases in Catalonia from January 2011 to December 2015. We extracted all IMD records from the MRS and SDR and linked the databases using the personal identification code (PIC). When the PIC was not available, data on notification, age and sex were used to identify duplicates between the two sources. In cases with inconclusive matching, the hospital was used as a fifth matching criterion.

208

Estimates were made for the entire 5-year period and by age, sex, year of report, size of municipality (<10,000 and  $\geq$ 10,000), country of birth, number of hospital beds, clinical form (meningitis, with or without sepsis, sepsis, and others), serogroup, death and reporting centre (private or public).

213

**Ethics statement**

The study was not submitted for research ethics approval as the activities described were conducted as part of the legislated mandate of the Health Department of Catalonia, the competent authority for surveillance of communicable diseases according to Decree 203/2015 of the 15 September which created the epidemiological surveillance network of Catalonia. [9] All the study activities formed part of public health surveillance and did not require informed consent. Personal data were used only for the matching process and measures to protect the confidentiality of personal data were applied (access to the data restricted to the personnel involved in data analysis, and removal of personal data from the datasets after matching).

223

224 **Patient and public involvement**

225 No patient involved

226

227 **Statistical methods**

228 The total number of IMD cases was estimated using the two-source capture-recapture method,

229 which uses Chapman's formula, [16] developed to reduce bias due to small samples:

$$230 \quad N = \frac{(L1 + 1)(L2 + 1)}{a + 1} - 1$$

$$231 \quad 95\%CI = N \pm 1.96 \sqrt{\frac{(L1 + 1)(L2 + 1)(L1 - a)(L2 - a)}{(a + 1)^2(a + 2)}}$$

232

233 where L1 is the number of cases in the SDR dataset, L2 is the number of cases reported to MRS,

234 and **a** is the number of cases captured by both systems. The sensitivity (Se) of case

235 ascertainment by the two sources was also calculated as the proportion of true cases detected by

236 each source, i.e. Se (1) =L1/N for source 1 and Se (2) =L2/N for source 2. The sensitivity of

237 bothsources combined was calculated as the proportion of cases detected by one of the two

238 sources or both, i.e., Se (1, 2) =(L1+L2-a)/N.

239

240 The independence of the sources was considered when applying the capture-recapture method.

241 [17, 18] In the two-by-two table, where **a** represents cases reported by two sources or242 combinations of sources, **b** and **c** cases reported exclusively by either of the two sources and **x**

243 the estimated non-reported cases by either of the sources, the odds ratio (OR = ax/bc) should not

244 differ from one.

245

246 A multinomial logit model was used to evaluate patient characteristics and the probability of

247 capture by different sources, which allows more precise estimates of the number of cases. [19,

248 20] We used a backwards stepwise procedure (using likelihood ratio tests, with a P-value &gt;0.2

1  
2  
3 249 as the criterion for removing variables from the model), [21, 22] starting with a full model  
4  
5 250 including all potential covariates, and we used the parameter estimates from the model to  
6  
7 251 estimate the sizes of population subgroups and their 95% confidence intervals (CI). All analyses  
8  
9 252 were made using R software version 3.0.1.  
10

11 253

12 254

## 15 255 **RESULTS**

### 17 256 **Patient characteristics**

18  
19  
20 257 Patient characteristics by source are shown in Table 1. From 2011 to 2015, 212 IMD cases were  
21  
22 258 reported to the SDR and 202 cases to the MRS, representing an incidence of 0.56 and 0.54  
23  
24 259 /100,000 persons-year, respectively. IMD due to serogroup B was the most-frequently reported  
25  
26 260 serogroup (77.4% and 75.7% in the SDR and MRS, respectively). Around 63% of patients were  
27  
28 261 aged < 15 years; the mean age was 21.4 for the SDR and 20.5 years for the MRS. Male sex was  
29  
30 262 more frequent in the SDR (52.4%) than in the MRS (49%). The SDR presented the most cases  
31  
32 263 in 2015 (48 cases; 22.6%) and the MRS (61 cases; 30.2%) in 2011. The SDR reported that 84%  
33  
34 264 of patients lived in a municipality of  $\geq 10,000$  people compared with 73% in the MRS. In both  
35  
36 265 sources, the number of cases declared in a hospital of  $\geq 200$  beds were around 70%. The main  
37  
38 266 clinical form in both sources was meningitis (54.7% and 64.8%, respectively) and sepsis (38.7%  
39  
40 267 and 32.7%, respectively). Reports from private centres represented 10% of cases in the SDR and  
41  
42 268 0.5% in the MRS. Twenty-two cases (10.4%) cases reported by the SDR died compared with 11  
43  
44 269 cases (5.4%) reported by the MRS .  
45  
46

47 270

48 271

49 272

50 273

51 274

52 275

276  
277**Table 1. Sociodemographic, clinical and microbiological characteristics of invasive meningococcal disease cases reported to the SDR and MRS, Catalonia 2011-2015**

|                                       | SDR (n=212) | MRS (n=202) |
|---------------------------------------|-------------|-------------|
| <b>Age groups</b>                     |             |             |
| Mean (SD)                             | 21.4 (27.9) | 20.5 (26.7) |
| Median (IQR)                          | 6 (36)      | 6 (32.3)    |
| <2 years, n (%)                       | 62 (29.8%)  | 61 (30.7%)  |
| 2 - 4 years, n (%)                    | 35 (16.8%)  | 30 (15.1%)  |
| 5 - 14 years, n (%)                   | 34 (16.3%)  | 35 (17.6%)  |
| 15 - 24 years, n (%)                  | 12 (5.8%)   | 12 (6.0%)   |
| 25 - 34 years, n (%)                  | 12 (5.8%)   | 9 (4.5%)    |
| 35 - 44 years, n (%)                  | 10 (4.8%)   | 12 (6.0%)   |
| 45 - 54 years, n (%)                  | 9 (4.3%)    | 7 (3.5%)    |
| >55 years, n (%)                      | 34 (16.3%)  | 33 (16.6%)  |
| NAs                                   | 1 (0.5%)    | 2 (1.0%)    |
| <b>Sex, n (%)</b>                     |             |             |
| Male                                  | 111 (52.4%) | 99 (49.0%)  |
| Female                                | 101 (47.6%) | 103 (51.0%) |
| <b>Year of report, n (%)</b>          |             |             |
| 2011                                  | 43 (20.3%)  | 61 (30.2%)  |
| 2012                                  | 41 (19.3%)  | 29 (14.4%)  |
| 2013                                  | 38 (17.9%)  | 30 (14.9%)  |
| 2014                                  | 42 (19.8%)  | 34 (16.8%)  |
| 2015                                  | 48 (22.6%)  | 48 (23.8%)  |
| <b>Size of municipality, n (%)</b>    |             |             |
| <10,000 people                        | 27 (12.7%)  | 28 (13.9%)  |
| ≥10,000 people                        | 177 (83.5%) | 148 (73.3%) |
| NAs                                   | 8 (3.8%)    | 26 (12.9%)  |
| <b>Country of birth, n (%)</b>        |             |             |
| Spain                                 | 194 (91.5%) | 188 (93.1%) |
| Other countries                       | 18 (8.5%)   | 14 (6.9%)   |
| <b>Number of hospital beds, n (%)</b> |             |             |
| <200                                  | 60 (28.3%)  | 65 (32.2%)  |
| ≥200                                  | 149 (70.3%) | 137 (67.8%) |
| NAs                                   | 3 (1.4%)    | 0 (0.0%)    |
| <b>Clinical form, n (%)</b>           |             |             |
| Meningitis                            | 116 (54.7%) | 131 (64.8%) |
| Sepsis                                | 82 (38.7%)  | 66 (32.7%)  |
| Other forms                           | 14 (6.6%)   | 4 (2.0%)    |
| NAs                                   | 0 (0.0%)    | 1 (0.5%)    |
| <b>Serogroup, n (%)</b>               |             |             |
| A                                     | 0 (0.0%)    | 2 (1.0%)    |
| B                                     | 164 (77.4%) | 153 (75.7%) |
| C                                     | 26 (12.3%)  | 21 (10.4%)  |
| W135                                  | 4 (1.9%)    | 6 (3.0%)    |
| Y                                     | 5 (2.4%)    | 2 (1.0%)    |
| Y/ W135                               | 1 (0.5%)    | 1 (0.5%)    |
| Non-groupable                         | 6 (2.8%)    | 4 (2.0%)    |
| NAs                                   | 6 (2.8%)    | 13 (6.4%)   |
| <b>Type of reporting centre</b>       |             |             |
| Private                               | 21 (10.0%)  | 1 (0.5%)    |
| Public                                | 190 (90.0%) | 201 (99.5%) |

278  
279

NAs: Not available; SDR: Statutory disease reporting; MDR: Microbiological reporting system

1  
2  
3 280 **Capture-recapture analysis**

4  
5 281 The odds ratio (OR) was 1.01 (95%CI 0.62-1.66), reinforcing the independence of the two  
6  
7 282 sources.

8  
9 283 During the period studied, 212 and 202 IMD cases were reported by the SDR and MRS,  
10  
11 284 respectively. One hundred thirty-seven cases (43.8%) coincided in both sources and 36 cases  
12  
13 285 (11.5%) were not reported to either source. The estimated number of cases was 313 (95% CI  
14  
15 286 295–330) (Table 2) and the estimated incidence rate was 0.83/100,000 persons-year.

16  
17  
18 287  
19 288 **Table 2. Capture–recapture analysis of two datasets to estimate the total number of**  
20 289 **invasive meningococcal disease cases, Catalonia 2011-2015**  
21 290

|       |                | SDR        |                | Total |
|-------|----------------|------------|----------------|-------|
|       |                | Identified | Not identified |       |
| MRS   | Identified     | 137        | 65             | 202   |
|       | Not identified | 75         | 36             | 111   |
| Total |                | 212        | 101            | 313   |

22  
23  
24  
25  
26  
27  
28 SDR: Statutory disease reporting  
MRS: Microbiological reporting system

29 291  
30  
31 292 The sensitivity of the SDR was 67.9% (95%CI 62.7-73.1) and that of the MRS was 64.7%  
32  
33 293 (95%CI 59.4-70.0) (P-<0.001) (Table 3). The sensitivity increased to 88.5% (95%CI 85.0-92.0)  
34  
35 294 when the datasets were combined.  
36

37 295

38  
39 296

40  
41 297

42  
43 298

44  
45 299

46  
47 300

48  
49 301

50  
51 302

52  
53 303

54  
55 304

56  
57 305

306 **Table 3. Capture–recapture analysis of all invasive meningococcal disease cases reported to the SDR and MRS stratified by characteristics, Catalonia**  
 307 **2011-2015**

|                                 | No. records in SDR | No. records in MRS | Matched records | Calculated unreported cases | Estimated total no. of cases (95% CI) | Sensitivity SDR (%) (95% CI) | Sensitivity MRS (%) (95% CI) | Difference in sensitivities (%) | P-value          |
|---------------------------------|--------------------|--------------------|-----------------|-----------------------------|---------------------------------------|------------------------------|------------------------------|---------------------------------|------------------|
| <b>All cases</b>                | 212                | 202                | 137             | 36                          | 313 (295, 330)                        | 67.9 (62.7, 73.1)            | 64.7 (59.4, 70.0)            | 3.2                             | <b>&lt;0.001</b> |
| <b>Age group</b>                |                    |                    |                 |                             |                                       |                              |                              |                                 |                  |
| <15 years                       | 131                | 126                | 87              | 20                          | 190 (177, 203)                        | 69.1 (62.6, 75.7)            | 66.5 (59.8, 73.2)            | 2.6                             | 0.468            |
| ≥15 years                       | 80                 | 74                 | 49              | 16                          | 121 (109, 133)                        | 66.4 (58.0, 74.8)            | 61.4 (52.7, 70.1)            | 5.0                             |                  |
| <b>Sex</b>                      |                    |                    |                 |                             |                                       |                              |                              |                                 |                  |
| Male                            | 111                | 99                 | 71              | 16                          | 155 (144, 166)                        | 71.8 (64.7, 78.9)            | 64.0 (56.5, 71.6)            | 7.8                             | 0.588            |
| Female                          | 101                | 103                | 66              | 20                          | 158 (145, 171)                        | 64.2 (56.7, 71.7)            | 65.5 (58.1, 72.9)            | -1.3                            |                  |
| <b>Year of report</b>           |                    |                    |                 |                             |                                       |                              |                              |                                 |                  |
| 2011-2013                       | 122                | 120                | 71              | 35                          | 206 (187, 226)                        | 59.3 (52.6, 66.0)            | 58.3 (51.6, 65.1)            | 1.0                             | <b>&lt;0.001</b> |
| 2014-2015                       | 90                 | 82                 | 66              | 6                           | 112 (106, 118)                        | 80.6 (73.2, 87.9)            | 73.4 (65.2, 81.6)            | 7.2                             |                  |
| <b>Size of municipality</b>     |                    |                    |                 |                             |                                       |                              |                              |                                 |                  |
| <10,000 people                  | 27                 | 28                 | 22              | 2                           | 35 (32, 37)                           | 78.7 (65.0, 92.4)            | 81.6 (68.7, 94.6)            | -2.9                            | 0.100            |
| ≥10,000 people                  | 177                | 148                | 110             | 23                          | 238 (225, 252)                        | 74.4 (68.9, 80.0)            | 62.2 (56.1, 68.4)            | 12.2                            |                  |
| <b>Country of birth</b>         |                    |                    |                 |                             |                                       |                              |                              |                                 |                  |
| Spain                           | 194                | 188                | 127             | 32                          | 287 (271, 304)                        | 67.6 (62.2, 73.0)            | 65.5 (60.0, 71.0)            | 2.1                             | 0.696            |
| Other countries                 | 18                 | 14                 | 10              | 3                           | 25 (20, 30)                           | 72.3 (54.7, 89.9)            | 56.2 (36.7, 75.7)            | 16.1                            |                  |
| <b>Number of hospital beds</b>  |                    |                    |                 |                             |                                       |                              |                              |                                 |                  |
| <200                            | 60                 | 65                 | 40              | 13                          | 97 (87, 108)                          | 61.7 (52.1, 71.4)            | 66.9 (57.5, 76.2)            | -5.1                            | 0.514            |
| ≥200                            | 149                | 137                | 97              | 22                          | 210 (197, 224)                        | 70.9 (64.7, 77.0)            | 65.2 (58.7, 71.6)            | 5.7                             |                  |
| <b>Clinical form</b>            |                    |                    |                 |                             |                                       |                              |                              |                                 |                  |
| Meningitis                      | 116                | 131                | 84              | 18                          | 181 (169, 193)                        | 64.2 (57.2, 71.2)            | 72.5 (66.0, 79.0)            | -8.3                            | 0.936            |
| Sepsis                          | 82                 | 66                 | 50              | 10                          | 108 (99, 117)                         | 75.9 (67.9, 84.0)            | 61.1 (51.9, 70.3)            | 14.8                            |                  |
| <b>Type of reporting centre</b> |                    |                    |                 |                             |                                       |                              |                              |                                 |                  |
| Private                         | 21                 | 1                  | 1               | 0                           | 21 (21, 21)                           | 100 (100, 100)               | 4.8 (-4.4, 13.9)             | 95.2                            | <b>0.002</b>     |
| Public                          | 190                | 201                | 136             | 26                          | 281 (267, 295)                        | 67.7 (62.2, 73.2)            | 71.6 (66.4, 76.9)            | -3.9                            |                  |

308 SDR: Statutory disease reporting; MDR: Microbiological reporting system



1  
2  
3 309 There were no differences in sensitivity between in <15 years and  $\geq 15$  years age groups (P-  
4 value=0.468) in either source although it was higher in the <15 years (69.1%;  
5 310  
6 95%CI 62.6-75.7 in the SDR and 66.5%; 95%CI 59.8-73.2 in the MR) S. The age groups with  
7 311  
8 the highest sensitivity were 2-4 years in the SDR, with 80.3% (95%CI 68.5-92.1), and 35-44  
9 312  
10 years in the MRS, with 80.5% (95%CI 60.4-100.0) (figure 1).  
11 313  
12 In 2011-2013, sensitivity for the SDR and the MRS were 59.3% (95%CI 52.6-66) and 58.3%  
13 314  
14 (95%CI 51.6-65.1), respectively, lower than that in 2014-2015 (80.6%; 95%CI 73.2-87.9, for  
15 315  
16 the SDR and 73.4%; 95%CI 65.2-81.6, for the MRS (P<0.001)) (Table 3). 2014 showed the  
17 316  
18 highest sensitivity for both sources: 91.3% (95%CI 83.2-99.4) for the SDR and 73.9% (95%CI  
19 317  
20 61.2-86.6) for the MRS (Figure 2). 2011 was the only year in which the MRS had a higher  
21 318  
22 sensitivity than the SDR (56.4%; 95%CI 47.1-65.8 and 39.8%; 95%CI 30.6-49.0, respectively).  
23 319  
24 In private centres the sensitivity of the SDR was 100% (95%CI 100-100) and that of the MRS  
25 320  
26 was 4.8% (95%CI -4.4-13.9). No differences were found in other characteristics analysed.  
27 321  
28  
29 322  
30  
31  
32 323 For l meningitis, 116 and 131 cases were reported by the SDR and the MRS, respectively. The  
33 324  
34 estimated number of meningitis cases was 181, and 18 cases were not reported by either source.  
35 325  
36 The highest sensitivity was detected in the MRS (72.5%; 95% CI 66-79) compared with the  
37 326  
38 SDR (64.2%; 95%CI 57.2-71.2) (P<0.001) (Table 4). 2014-2015 showed a higher sensitivity in  
39 327  
40 both sources compared with 2011-2013: 82.4% (95%CI 72.7-92) in the MRS and 75.6%  
41 328  
42 (95%CI 64.7-86.5) in the SDR. Public centres had a higher sensitivity in the MRS (77.7%;  
43 329  
44 95%CI 71.4-84.0) and in the SDR (63.9%; 95%CI 56.6-71.2) (P<0.037).  
45 330  
46  
47  
48  
49  
50  
51  
52  
53  
54  
55  
56  
57  
58  
59  
60

331

332 **Table 4. Capture–recapture analysis of meningococcal meningitis reported to the SDR and MRS stratified by characteristics, Catalonia 2011-2015**

333

|                                 | No. records in SDR | No. records in MRS | Matched records | Calculated unreported cases | Estimated total no. of cases (95% CI) | Sensitivity SDR (%) (95% CI) | Sensitivity MRS (%) (95% CI) | Difference in sensitivities (%) | P-value          |
|---------------------------------|--------------------|--------------------|-----------------|-----------------------------|---------------------------------------|------------------------------|------------------------------|---------------------------------|------------------|
| <b>All cases</b>                | 116                | 131                | 84              | 18                          | 181 (169, 193)                        | 64.2 (57.2, 71.2)            | 72.5 (66.0, 79.0)            | -8.3                            | <b>&lt;0.001</b> |
| <b>Age group</b>                |                    |                    |                 |                             |                                       |                              |                              |                                 |                  |
| <15 years                       | 72                 | 81                 | 51              | 13                          | 115 (104, 125)                        | 63.1 (54.3, 72.0)            | 71.0 (62.7, 79.3)            | -7.9                            | 0.682            |
| ≥15 years                       | 43                 | 49                 | 32              | 6                           | 66 (60, 73)                           | 65.5 (53.9, 77.0)            | 74.6 (64.1, 85.1)            | -9.1                            |                  |
| <b>Sex</b>                      |                    |                    |                 |                             |                                       |                              |                              |                                 |                  |
| Male                            | 62                 | 69                 | 47              | 7                           | 91 (84, 98)                           | 68.2 (58.6, 77.8)            | 75.9 (67.1, 84.7)            | -7.7                            | 0.245            |
| Female                          | 54                 | 62                 | 37              | 12                          | 91 (81, 101)                          | 59.9 (49.8, 70.0)            | 68.7 (59.2, 78.3)            | -8.9                            |                  |
| <b>Year of report</b>           |                    |                    |                 |                             |                                       |                              |                              |                                 |                  |
| 2011-2013                       | 71                 | 82                 | 47              | 18                          | 124 (111, 137)                        | 57.5 (48.8, 66.2)            | 66.4 (58.1, 74.7)            | -8.9                            | <b>0.013</b>     |
| 2014-2015                       | 45                 | 49                 | 37              | 3                           | 60 (56, 64)                           | 75.6 (64.7, 86.5)            | 82.4 (72.7, 92.0)            | -6.7                            |                  |
| <b>Size of municipality</b>     |                    |                    |                 |                             |                                       |                              |                              |                                 |                  |
| <10,000 people                  | 19                 | 20                 | 16              | 1                           | 24 (22, 26)                           | 80.2 (64.1, 96.2)            | 84.4 (69.8, 99.0)            | -4.2                            | 0.165            |
| ≥10,000 people                  | 93                 | 93                 | 65              | 12                          | 133 (124, 143)                        | 70.0 (62.2, 77.8)            | 70.0 (62.2, 77.8)            | 0.0                             |                  |
| <b>Country of birth</b>         |                    |                    |                 |                             |                                       |                              |                              |                                 |                  |
| Spain                           | 107                | 120                | 77              | 17                          | 167 (155, 179)                        | 64.3 (57.0, 71.5)            | 72.1 (65.3, 78.9)            | -7.8                            | 0.862            |
| Other countries                 | 9                  | 11                 | 7               | 1                           | 14 (12, 17)                           | 64.3 (39.2, 89.4)            | 78.6 (57.1, 100.0)           | -14.3                           |                  |
| <b>Number of hospital beds</b>  |                    |                    |                 |                             |                                       |                              |                              |                                 |                  |
| <200                            | 31                 | 40                 | 23              | 6                           | 54 (47, 61)                           | 57.7 (44.5, 70.9)            | 74.5 (62.8, 86.2)            | -16.8                           | 0.516            |
| ≥200                            | 84                 | 91                 | 61              | 11                          | 126 (116, 135)                        | 67.1 (58.9, 75.4)            | 72.7 (64.9, 80.5)            | -5.6                            |                  |
| <b>Type of reporting centre</b> |                    |                    |                 |                             |                                       |                              |                              |                                 |                  |
| Private                         | 9                  | 1                  | 1               | 0                           | 9 (9, 9)                              | 100.0 (100.0, 100.0)         | 11.1 (-9.4, 31.6)            | 88.9                            | <b>0.037</b>     |
| Public                          | 107                | 130                | 83              | 14                          | 168 (158, 178)                        | 63.9 (56.6, 71.2)            | 77.7 (71.4, 84.0)            | -13.7                           |                  |

334 SDR: Statutory disease reporting; MDR: Microbiological reporting system

335

1  
2  
3 336 For sepsis, 82 cases and 66 cases were reported by the SDR and the MRS, respectively. The  
4  
5 337 sensitivity was higher for the SDR (75.9%; 95%CI 67.9-84) than the MRS (61.1%; 95%CI  
6  
7 338 51.9-70.3) (Table 5). There were 108 estimated cases and 10 cases were not reported by either  
8  
9 339 source. The sensitivity was higher in the <15 years than in the  $\geq 15$  years in both sources, but  
10  
11 340 higher in the SDR (81.1%; 95%CI 71.1-91.1 versus 71%; 95%CI 59.4-82.5 for the MRS;  
12  
13 341  $P=0.0036$ ), and higher in 2014-2015 than in 2011-2013 (87.6%; 95%CI 78-97.3 for the SDR  
14  
15 342 and 71.9%; 95%CI 58.7-85.1 for the MRS) ( $P<0.015$ ).  
16  
17 343  
18  
19 344 Serogroup B (Supplementary Table 1) showed the sensitivity of the SDR was higher than that of  
20  
21 345 the MRS (74.6%; 95%CI 68.8-80.3 and 69.6%; 95%CI 63.5-75.6, respectively). There were  
22  
23 346 differences according to the period and the type of centre. In 2014-2015, the sensitivity was  
24  
25 347 87.1% (95%CI 79.7-94.5) for the SDR and 78.3% (95%CI 69.2-87.4) for the MRS ( $P<0.002$ ).  
26  
27 348 In private centres, the sensitivity in SDR was 100% compared with 7.1% (95%CI -6.4-20.6)  
28  
29 349 ( $P=0.004$ ) in MRS. The sensitivity was higher for IMD serogroup C cases in SDR than in MRS  
30  
31 350 (76.7%; 95%CI 62.5-90.9 and 62%; 95%CI 45.6-78.3, respectively) (Supplementary Table 2).  
32  
33 351 All 22 deaths were reported in the SDR (CFR: 10.4%), and the sensitivity of the SDR was  
34  
35 352 higher than that of the MRS (100%; 95%CI 100-100 vs 50%; 95%CI 29.1-70.9,  $P=0.104$ )  
36  
37 353 (Supplementary Table 3).  
38  
39  
40  
41  
42  
43  
44  
45  
46  
47  
48  
49  
50  
51  
52  
53  
54  
55  
56  
57  
58  
59  
60

354 **Table 5. Capture–recapture analysis of meningococcal septicaemia reported to the SDR and MRS stratified by characteristics, Catalonia 2011-2015**  
 355

|                                   | No. records in SDR | No. records in MRS | Matched records | Calculated unreported cases | Estimated total no. of cases (95% CI) | Sensitivity SDR (%) (95% CI) | Sensitivity MRS (%) (95% CI) | Difference in sensitivities (%) | P-value          |
|-----------------------------------|--------------------|--------------------|-----------------|-----------------------------|---------------------------------------|------------------------------|------------------------------|---------------------------------|------------------|
| <b>All cases</b>                  | 82                 | 66                 | 50              | 10                          | 108 (99, 117)                         | 75.9 (67.9, 84.0)            | 61.1 (51.9, 70.3)            | 14.8                            | <b>&lt;0.001</b> |
| <b>Age at notification, years</b> |                    |                    |                 |                             |                                       |                              |                              |                                 |                  |
| <15 years                         | 48                 | 42                 | 34              | 4                           | 60 (55, 64)                           | 81.1 (71.1, 91.1)            | 71.0 (59.4, 82.5)            | 10.1                            | <b>0.036</b>     |
| ≥15 years                         | 34                 | 23                 | 16              | 8                           | 49 (40, 58)                           | 70.3 (57.4, 83.1)            | 47.5 (33.4, 61.6)            | 22.7                            |                  |
| <b>Sex</b>                        |                    |                    |                 |                             |                                       |                              |                              |                                 |                  |
| Male                              | 43                 | 27                 | 22              | 5                           | 53 (47, 59)                           | 81.8 (71.3, 92.2)            | 51.3 (37.8, 64.8)            | 30.4                            | <b>0.315</b>     |
| Female                            | 39                 | 39                 | 28              | 5                           | 55 (49, 60)                           | 72.0 (60.0, 83.9)            | 72.0 (60.0, 83.9)            | 0.0                             |                  |
| <b>Year of report</b>             |                    |                    |                 |                             |                                       |                              |                              |                                 |                  |
| 2011-2013                         | 43                 | 34                 | 22              | 11                          | 66 (56, 77)                           | 65.2 (53.6, 76.7)            | 51.5 (39.5, 63.6)            | 13.6                            | <b>0.015</b>     |
| 2014-2015                         | 39                 | 32                 | 28              | 2                           | 45 (42, 48)                           | 87.6 (78.0, 97.3)            | 71.9 (58.7, 85.1)            | 15.7                            |                  |
| <b>Size of municipality</b>       |                    |                    |                 |                             |                                       |                              |                              |                                 |                  |
| <10,000 people                    | 7                  | 7                  | 5               | 1                           | 10 (8, 12)                            | 72.2 (44.0, 100.0)           | 72.2 (44.0, 100.0)           | 0.0                             | <b>0.918</b>     |
| ≥10,000 people                    | 71                 | 52                 | 43              | 6                           | 86 (80, 93)                           | 82.9 (74.9, 90.8)            | 60.7 (50.3, 71.0)            | 22.2                            |                  |
| <b>Country of birth</b>           |                    |                    |                 |                             |                                       |                              |                              |                                 |                  |
| Spain                             | 73                 | 63                 | 47              | 9                           | 98 (90, 106)                          | 74.7 (66.1, 83.3)            | 64.5 (55.0, 74.0)            | 10.2                            | <b>0.275</b>     |
| Other countries                   | 9                  | 3                  | 3               | 0                           | 9 (9, 9)                              | 100.0 (100.0, 100.0)         | 33.3 (2.5, 64.1)             | 66.7                            |                  |
| <b>Number of hospital beds</b>    |                    |                    |                 |                             |                                       |                              |                              |                                 |                  |
| <200                              | 25                 | 23                 | 16              | 4                           | 36 (31, 42)                           | 70.0 (55.0, 85.1)            | 64.4 (48.7, 80.1)            | 5.6                             | <b>0.831</b>     |
| ≥200                              | 56                 | 43                 | 34              | 6                           | 71 (65, 78)                           | 79.2 (69.7, 88.7)            | 60.8 (49.4, 72.2)            | 18.4                            |                  |
| <b>Type of reporting centre</b>   |                    |                    |                 |                             |                                       |                              |                              |                                 |                  |
| Private                           | 9                  | 0                  | 0               | 0                           | 9 (9, 9)                              | 100.0 (100.0, 100.0)         | 0 (0.0, 0.0)                 | 100                             | <b>0.988</b>     |
| Public                            | 73                 | 66                 | 50              | 8                           | 97 (89, 104)                          | 75.9 (67.3, 84.4)            | 68.6 (59.3, 77.9)            | 7.3                             |                  |

356

357 SDR: Statutory disease reporting; MDR: Microbiological reporting system

358

1  
2  
3 359 The results of the multinomial logit model for all cases are shown in Table 6. The variables  
4  
5 360 considered significant in defining the sensitivity of the two sources were year of report (2011-  
6  
7 361 2013 versus 2014-2015) and size of municipality. With these variables in the model, the  
8  
9 362 adjusted estimate of the total number of cases was 279 cases (95%CI 266-296) and the  
10  
11 363 estimated incidence rate was 0.7/100,000 persons-year.  
12  
13  
14 364

15  
16 365 **Table 6. Variables defining the sensitivity of the SDR and MRS in detecting invasive**  
17 366 **meningococcal diseases cases. Multinomial logit model**  
18 367  
19 368

|                                                               | <b>OR (95%CI)</b> | <b>p-value</b> |
|---------------------------------------------------------------|-------------------|----------------|
| <b>Year of report (2014-2015)</b>                             | 2.29 (1.35, 3.89) | <b>0.002</b>   |
| <b>Size of municipality (<math>\geq 10,000</math> people)</b> | 0.51 (0.23, 1.12) | 0.093          |

20  
21  
22  
23 369 OR: odds ratio; n estimate: 279 (266, 296)  
24  
25 370

## 26 27 371 DISCUSSION

28  
29 372 The sensitivity obtained by combining the two surveillance system for IMD cases was 88.5%,  
30  
31 373 greater than for each source s (67.9% and 64.7%, respectively). Globally, the SDR showed  
32  
33 374 higher sensitivity than the MDR, mainly for cases of sepsis, I serogroup B and serogroup C,  
34  
35 375 although for meningitis the sensitivity of the MDR was higher than that of the SDR.  
36  
37 376 Similar studies found greater sensitivities by combining data systems than we did. Baldovin et  
38  
39 377 al. [23] in Italy, reported an overall sensitivity of 94.7% by combining four data sources  
40  
41 378 (mandatory notification system, laboratory surveillance, invasive bacterial surveillance and  
42  
43 379 hospital discharge). Jansson et al. [24], in Sweden, found a global sensitivity of 98.7%, 91.1%  
44  
45 380 for clinical notification and 85.4% for laboratory reporting. In Austria a good agreement  
46  
47 381 between the National Reference Center for meningococci and the hospital discharge was found,  
48  
49 382 although a clinical review of hospital discharge data was necessary to detect false positive cases  
50  
51 383 recorded. [25]  
52  
53 384

54  
55 385 The sensitivity was similar in children aged <15 years than in persons aged  $\geq 15$  years in both  
56  
57 386 sources (69.1% for the SDR and 66.5% for the MRS; P=0.468). Gibson et al., [26] in Australia,  
58  
59  
60

1  
2  
3 387 analysed IMD sensitivity in children aged < 15 years in three sources: notifiable system,  
4  
5 388 hospitalized patients and mortality data. They found a greater sensitivity (99.5%) than we did,  
6  
7 389 although 15% of hospitalized children were false-positive cases.  
8

9 390  
10  
11 391 We found a greater sensitivity for meningitis in the MRS than in the SDR (72.5% vs 64.2%). A  
12  
13 392 possible explanation is that meningitis is considered a more serious disease and, therefore,  
14  
15 393 microbiologists are more sensitive to its reporting. It is difficult to compare our results with  
16  
17 394 those of other studies, since other sources of information were used or the independence of data  
18  
19 395 sources was presumed but not demonstrated, [25] which is essential when using the capture-  
20  
21 396 recapture method.  
22  
23

24 397  
25  
26 398 Notification of confirmed cases of IMD by laboratories is essential in epidemiological  
27  
28 399 surveillance. [27] Molecular information on circulating serogroups that is required to implement  
29  
30 400 public health measures such as vaccination is essential to control the disease [28] and evaluate  
31  
32 401 the impact of available vaccines.  
33  
34

35 402  
36  
37 403 In the absence of automated electronic reporting, monitoring and increasing the speed of  
38  
39 404 laboratory reports may allow the public health department to administer chemoprophylaxis and  
40  
41 405 vaccination to contacts. [28] Although a higher sensitivity has been reported for electronic  
42  
43 406 reporting than for paper-based reports by some authors, [29] during the study period, electronic  
44  
45 407 surveillance was used in the SDR but not in the MDR, which may explain, at least in part, why  
46  
47 408 the MDR had a lower sensitivity than the SDR. [30]  
48

49 409  
50  
51 410 In the multinomial model, the 2014-2015 period and the size of the municipality show a higher  
52  
53 411 sensitivity in the SDR, suggesting that IMD was well recorded in the two surveillance systems,  
54  
55 412 although 36 cases (11.5%) were not captured by either source. This suggests there was  
56  
57 413 underreporting, despite the clinical severity of the disease. It is very important to improve  
58  
59  
60

1  
2  
3 414 reporting by all physicians and microbiologists to the SDR and MDR to assess the impact of  
4  
5 415 interventions such as immunization.  
6

7 416  
8  
9 417 The estimated IMD incidence rate of 0.7/100, 000 persons-year found in the multinomial model  
10  
11 418 is less than that found using capture-recapture (0.83/100,000 persons-year) but higher than that  
12  
13 419 calculated using the SDR (0.56/100,000 persons-year) or MDR data (0.54/100,000 persons-  
14  
15 420 year). Other European studies showed incidence rates of between 0.39 [23] and 1.18/100,000  
16  
17 421 persons-year. [25]  
18

19 422  
20  
21 423 The sensitivity of the two sources were intermediate (67.9% for the SDR and 64.7% for the  
22  
23 424 MRS). The lower sensitivity of the MRS may be due to the fact that the MRS is a sentinel  
24  
25 425 system with a coverage of 82% of acute hospital beds and without private centres. In our series,  
26  
27 426 21 cases (10%) included in the SDR were reported by private centres, while only one case  
28  
29 427 (0.5%) was reported to the MSR; this patient was finally transferred to a public hospital. The  
30  
31 428 inclusion of cases that have an equal probability of selection in one source might lead to an  
32  
33 429 overestimation. Other authors have reported this limitation when the hospital discharge data set  
34  
35 430 includes probable cases which are not included in the reference centre. [25]  
36

37 431  
38  
39 432 Death was registered in 22 cases (10.5%), similar to that reported in other European countries  
40  
41 433 (ECDC) but slightly lower than that observed in Italy (14%) using the capture-recapture  
42  
43 434 method. [23] All cases were reported to the SDR but only 50% were reported to the MRS,  
44  
45 435 indicating that clinical data are better in the SDR than in the MRS. Other authors have used  
46  
47 436 mortality data for capture-recapture analysis and concluded that all deaths were reported in  
48  
49 437 notifiable systems. [26]  
50

51 438  
52  
53  
54  
55 439 The sensitivity of the sources studied for the surveillance of IMD cannot be generalized to other  
56  
57 440 diseases because physicians' or microbiologists' perception of the importance of IMD differs  
58  
59 441 from that of other diseases. [29]  
60

1  
2  
3 442  
4  
5 443 The main strength of this study is that the two sources had wide coverage. The SDR is a  
6  
7 444 universal epidemiological surveillance source and, unlike the MDR, is a sentinel source, with a  
8  
9 445 high coverage of 83%. Cases with PIC accounted for 85.5% of all cases reported to detect  
10  
11 446 whether cases were coincident or not. In addition, the independence of the two sources was  
12  
13 447 demonstrated, complying with the premise of the capture-recapture method.  
14  
15  
16 448

17  
18 449 A limitation of the study was that not all cases had the same probability of being selected from a  
19  
20 450 given source. Cases diagnosed in private centres or public centres that did not participate in the  
21  
22 451 MRS could not be reported by this system and this may explain, at least in part, the lower  
23  
24 452 sensitivity than the SDR. This highlights the importance of including public and private centres  
25  
26 453 to increase the robustness of the MRS. Another limitation was that we did not analyse the role  
27  
28 454 of the electronic surveillance system, although a previous study detected greater sensitivity of  
29  
30 455 the SDR when electronic surveillance was introduced. [30]  
31  
32  
33 456

## 34 457 **CONCLUSIONS**

35  
36 458 The sensitivity of enhanced surveillance through the combination of two complementary  
37  
38 459 sources (statutory reporting by physicians and microbiological reporting by microbiologists)  
39  
40 460 was higher than that of the individual sources. These systems are complementary and constitute  
41  
42 461 the basic sources of information necessary for adequate epidemiological surveillance of IMD.  
43  
44 462 Specific studies to estimate the factors associated with under-reporting are needed to reinforce  
45  
46 463 epidemiological surveillance of this disease.  
47  
48  
49 464

50  
51  
52 465

## 53 54 55 466 **DECLARATIONS**

56  
57  
58 467 **Ethics approval and consent to participate**  
59  
60



1  
2  
3 468 Not applicable  
4  
5

6 469 **Consent of publication**  
7

8  
9 470 Not applicable  
10

11  
12 471 **Availability of data and materials**  
13

14  
15 472 The datasets used and analysed during the current study available from the corresponding author  
16  
17 473 on reasonable request.

18  
19 474 **Competing interests**  
20

21 475 The authors declare that they have no competing interests.  
22

23 476 **Funding**  
24

25  
26 477 This work was supported partially by CIBER of Epidemiology and Public Health (CIBERESP),  
27  
28 478 Carlos III Health Institute and the Catalan Agency for the Management of Grants for University  
29  
30 479 Research [AGAUR Grant Number 2017 / SGR 1342]. The funding sources played no part in the  
31  
32 480 design of the study and collection, analysis, and interpretation of data and in writing the  
33  
34 481 manuscript.  
35  
36

37 482 **Author contributions**  
38

39 483 PC analyzed and interpreted data, studied conception and design of the study and writes the  
40  
41 484 manuscript; MV and NS did statistical analysis; GC revised and collected data; TG,SH,LR  
42  
43 485 collected data; MJ revised the study and AD did critical revision and got funding.  
44  
45  
46

47 486 **Acknowledgements**  
48

49  
50 487 **The Working Group of the Microbiological Reporting System of Catalonia is composed**  
51

52 488 **by:**  
53

54  
55 489 M. Teresa Bastida (Fundació Hospital Esperit Sant); Frederic Ballester; Isabel Pujol (Hospital  
56  
57 490 Universitari de Sant Joan de Reus); Miguel Ángel Benítez, Alba Cebollero (Consorti de  
58  
59 491 Laboratoris Intercomarcal de l'Alt Penedès); Jordi Vila, Jordi Bosch, (Hospital Clínic); Ana  
60

1  
2  
3 492 Calderón (Hospital Municipal de Badalona); Margarida Curriu (Hospital Comarcal de Sant  
4  
5 493 Bernabé); M. Ángeles Domínguez, Fe Tubau Quintano (Hospital Universitari de Bellvitge);  
6  
7 494 Jose Manuel Ramírez (Hospital Universitari de Girona Dr. Josep Trueta); Ma José Fusté  
8  
9 495 (Clínica de Terres de l'Ebre); Carme Gallés, Pilar Hernández Pérez, Elisenda Capdevila Gil de  
10  
11 496 Bernabé Corporació de Salut del Maresme i La Selva); Paula Gassiot (Hospital de Figueres);  
12  
13 497 Frederic Gómez (Hospital Universitari de Tarragona Joan XXIII); Araceli González-Cuevas  
14  
15 498 (Hospital General del Parc Sanitari Sant Joan de Déu); Marius Juanpere (Hospital Móra  
16  
17 499 d'Ebre); Carmen Muñoz-Almagro, Amaresh Pérez-Argüello (Hospital Sant Joan de Déu.  
18  
19 500 Esplugues de Llobregat); Carmina Martí (Hospital General de Granollers); Núria Margall  
20  
21 501 (Hospital de la Santa Creu i Sant Pau); Lurdes Matas, Montserrat Gimenez (Hospital  
22  
23 502 Universitari Germans Trias i Pujol); Montserrat Morta, Glòria Trujillo (Hospital Sant Joan de  
24  
25 503 Déu. Manresa-Fundació Althaia); Silvia Noguer (Hospital del Vendrell); Montserrat Olsina  
26  
27 504 (Hospital General de Catalunya); Amaia Oteiza (H. Palamós); Pepa Pérez (Catlab-Centre  
28  
29 505 Analítics Terrassa); Mar Olga Pérez-Moreno (Hospital Verge de la Cinta de Tortosa); Tomás  
30  
31 506 Pumarola, Juanjo González (Hospital Universitari Vall d'Hebron); Xavier Raga (Hospital de  
32  
33 507 Sant Pau i Santa Tecla); Mercè Garcia, Mercè Ribelles (Hospital Universitari Arnau de  
34  
35 508 Vilanova de Lleida); Esther Sanfeliu (Hospital d'Olot Comarcal de la Garrotxa); Goretti Sauca  
36  
37 509 (Hospital de Mataró); Dionisia Fontanals, Isabel Sanfeliu (Corporació Sanitaria Parc Taulí,  
38  
39 510 Sabadell) i Anna Vilamala (Hospital General de Vic).

40  
41  
42  
43  
44 511 **The Working Group of the Epidemiological Surveillance Network of Catalonia is**

45  
46 512 **composed by:**

47  
48  
49 513 César Arias, Irene Barrabeig, Neus Camps, Mònica Carol, Núria Follia, Pere Godoy, Ana  
50  
51 514 Martínez, Sofia Minguell, Ignasi Parron, M<sup>a</sup> Rosa Sala-Farré, Ariadna Rovira (Agència de Salut  
52  
53 515 Pública de Catalunya), Cristina Rius (Agència de Salut Pública de Barcelona).

54  
55  
56 516

- 1  
2  
3 517 **Working Group of the Microbiological Reporting System of Catalonia and Working**  
4  
5 518 **Group of the Epidemiological Surveillance Network of Catalonia**  
6  
7 519  
8  
9 520 Maria Teresa Bastida  
10  
11 521 Laboratori de Microbiologia  
12  
13 522 Fundació Hospital Esperit Sant  
14  
15 523 C/ Pons i Rabadà s/n  
16  
17 524 08923 Santa Coloma de Gramenet, Spain  
18  
19 525  
20  
21  
22 526 Frederic Ballester  
23  
24 527 Laboratori de Referencia Sud  
25  
26 528 Hospital Sant Joan de Reus  
27  
28 529 Av. Dr Josep Laporte, 2,  
29  
30 530 43204 Reus, Tarragona, Spain  
31  
32 531  
33  
34 532 Isabel Pujol  
35  
36 533 Laboratori de Referencia Sud  
37  
38 534 Hospital Sant Joan de Reus  
39  
40 535 Av. Dr Josep Laporte, 2,  
41  
42 536 43204 Reus, Tarragona, Spain  
43  
44 537  
45  
46 538 Miguel Angel Benítez  
47  
48 539 Servei de Microbiologia  
49  
50 540 CLILAB Diagnòstics  
51  
52 541 C/ Espirall, s/n  
53  
54 542 08720 Vilafranca del Penedès, Barcelona, Spain  
55  
56 543  
57  
58 544 Alba Cebollero  
59  
60

1  
2  
3 545 Servei de Microbiologia  
4  
5 546 CLILAB Diagnòstics  
6  
7 547 C/ Espirall, s/n  
8  
9 548 08720 Vilafranca del Penedès, Barcelona, Spain  
10  
11 549  
12  
13 550 Jordi Vila  
14  
15 551 Servei de Microbiologia  
16  
17 552 Hospital Clínic de Barcelona  
18  
19 553 C/ Villarroel, 170  
20  
21 554 08036 Barcelona, Spain.  
22  
23 555  
24  
25 556 Jordi Bosch  
26  
27 557 Servei de Microbiologia  
28  
29 558 Hospital Clínic de Barcelona  
30  
31 559 C/ Villarroel, 170  
32  
33 560 08036 Barcelona, Spain.  
34  
35 561  
36  
37 562 Ana Calderon  
38  
39 563 Servei de Microbiologia  
40  
41 564 Hospital Municipal de Badalona  
42  
43 565 C/ Via Augusta, 9-13  
44  
45 566 08911 Badalona, Barcelona, Spain  
46  
47 567  
48  
49 568 Margarida Curriu  
50  
51 569 Servei de Microbiologia  
52  
53 570 Hospital Sant Bernabé  
54  
55 571 Ctra. de Ribes, s/n  
56  
57 572 08600 Berga, Spain  
58  
59  
60

1  
2  
3 573  
4  
5 574 M Angeles Dominguez  
6  
7 575 Hospital Universitari de Bellvitge, Universitat de Barcelona,  
8  
9 576 C/ Feixa Llarga s/n  
10  
11 577 08907 L'Hospitalet, Barcelona, Spain  
12  
13 578  
14  
15 579 Fe Tubau Quintano  
16  
17 580 Hospital Universitari de Bellvitge, Universitat de Barcelona,  
18  
19 581 C/ Feixa Llarga s/n  
20  
21 582 08907 L'Hospitalet, Barcelona, Spain  
22  
23 583  
24  
25 584 Jose Manuel Ramirez  
26  
27 585 Àrea de Microbiologia, Laboratori Clínic - Institut Català de la Salut Girona  
28  
29 586 Hospital Universitari Dr. Josep Trueta  
30  
31 587 Av. França, s/n  
32  
33 588 17007 Girona, Spain  
34  
35 589  
36  
37 590 M<sup>a</sup> Jose Fusté  
38  
39 591 Servei de Microbiologia  
40  
41 592 Clínica Terres de l'Ebre  
42  
43 593 Pl. De Joaquim Bau, 6-8  
44  
45 594 43500 Tortosa, Tarragona, Spain  
46  
47 595  
48  
49 596 Carme Gallés  
50  
51 597 Unitat de Microbiologia, Servei d'Anàlisis Clíniques  
52  
53 598 Corporació de Salut del Maresme i la Selva  
54  
55 599 C/ Sant Jaume, 209-217  
56  
57 600 08370 Calella, Barcelona, Spain  
58  
59  
60

- 1  
2  
3 601  
4  
5 602 Pilar Hernandez Pérez  
6  
7 603 Unitat de Microbiologia, Servei d'Anàlisis Clíniques  
8  
9 604 Corporació de Salut del Maresme i la Selva.  
10  
11 605 C/ Sant Jaume, 209-217  
12  
13 606 08370 Calella, Barcelona, Spain  
14  
15 607  
16  
17 608 Elisenda Capdevila Gil de Bernabe  
18  
19 609 Unitat de Microbiologia, Servei d'Anàlisis Clíniques  
20  
21 610 Corporació de Salut del Maresme i la Selva.  
22  
23 611 C/ Sant Jaume, 209-217  
24  
25 612 08370 Calella, Barcelona, Spain  
26  
27  
28 613  
29  
30 614 Paula Gassiot  
31  
32 615 Àrea de Microbiologia, Laboratori d'Anàlisis Clíniques  
33  
34 616 Hospital de Figueres  
35  
36 617 Rda. Rector Arolas, s/n  
37  
38 618 17600 Figueres, Girona, Spain  
39  
40 619  
41  
42 620 Frederic Gómez-Bertomeu  
43  
44 621 Àrea de Microbiologia, Laboratori Clínic ICS - Camp de Tarragona  
45  
46 622 Hospital Joan XXIII  
47  
48 623 C/ Dr. Mallafrè Guasch, 4  
49  
50 624 43005 Tarragona, Spain  
51  
52 625  
53  
54 626 Araceli González-Cuevas  
55  
56 627 Laboratori de Microbiologia  
57  
58 628 Hospital General del Parc Sanitari Sant Joan de Déu  
59  
60

1  
2  
3 629 Camí Vell de la Colònia, 25  
4  
5 630 08830 Sant Boi de Llobregat, Barcelona, Spain  
6  
7 631  
8  
9 632 Marius Juanpere  
10  
11 633 Servei de Microbiologia  
12  
13 634 Hospital Comarcal Móra d'Ebre  
14  
15 635 C/ de Benet Messeguer, s/n  
16  
17 636 43770 Móra d'Ebre, Tarragona, Spain  
18  
19 637  
20  
21  
22 638 Carmen Muñoz-Almagro  
23  
24 639 Hospital Universitari Sant Joan de Déu  
25  
26 640 Pg. Sant Joan de Déu 2  
27  
28 641 08950 Esplugues, Barcelona, Spain  
29  
30 642  
31  
32 643 Amaresch Perez Arguello  
33  
34 644 Hospital Universitari Sant Joan de Déu  
35  
36 645 Pg. Sant Joan de Déu 2  
37  
38 646 08950 Esplugues, Barcelona, Spain  
39  
40 647  
41  
42 648  
43  
44 649 Carmina Martí  
45  
46 650 Laboratori de Microbiologia  
47  
48 651 Hospital General de Granollers  
49  
50 652 Av. Francesc Ribas, s/n  
51  
52 653 08402 Granollers, Barcelona, Spain  
53  
54 654  
55  
56 655 Nuria Margall  
57  
58 656 Servei de Microbiologia  
59  
60

1  
2  
3 657 Hospital Santa Creu i Sant Pau  
4  
5 658 C/ de Sant Quintí, 89  
6  
7 659 08041 Barcelona, Spain  
8  
9 660  
10  
11 661 Lurdes Matas  
12  
13 662 Laboratori clínic Metropolitana Nord  
14  
15 663 Hospital Universitari Germans Trias i Pujol  
16  
17 664 Ctra. de Canyet, s/n  
18  
19 665 08916 Badalona, Barcelona, Spain  
20  
21 666  
22  
23 667 Montserrat Giménez  
24  
25 668 Laboratori clínic Metropolitana Nord  
26  
27 669 Hospital Universitari Germans Trias i Pujol  
28  
29 670 Ctra. de Canyet, s/n  
30  
31 671 08916 Badalona, Barcelona, Spain  
32  
33 672  
34  
35 673 Montserrat Morta  
36  
37 674 Servei de Microbiologia  
38  
39 675 Hospital Sant Joan de Déu. Fundació ALTHAIA  
40  
41 676 C/ Dr. Joan Soler, s/n  
42  
43 677 08243 Manresa, Barcelona, Spain  
44  
45 678  
46  
47 679 Gloria Trujillo  
48  
49 680 Servei de Microbiologia  
50  
51 681 Hospital Sant Joan de Déu. Fundació ALTHAIA  
52  
53 682 C/ Dr. Joan Soler, s/n  
54  
55 683 08243 Manresa, Barcelona, Spain  
56  
57 684  
58  
59  
60



- 1  
2  
3 685 Silvia Noguer  
4  
5 686 Hospital del vendrell  
6  
7 687 Ctra. Barcelona, s/n,  
8  
9 688 43700 El Vendrell, Tarragona, Spain  
10  
11  
12 689 Montserrat Olsina  
13  
14 690 Laboratori d'Anàlisis Clínics, Microbiologia  
15  
16 691 Hospital General de Catalunya  
17  
18 692 C/ Pedro i Pons, 1  
19  
20 693 08190 Sant Cugat del Vallès, Barcelona, Spain  
21  
22  
23 694  
24  
25 695 Amaia Oteiza Ubanell  
26  
27 696 Laboratori d'Anàlisis Clíniques  
28  
29 697 Hospital de Palamós  
30  
31 698 C/ Hospital, 36,  
32  
33 699 17230 Palamós, Spain  
34  
35 700  
36  
37 701 Pepa Perez  
38  
39 702 Departament de Microbiologia, Catlab - Centre Analítiques Terrassa, AIE  
40  
41 703 Parc Logístic de Salut  
42  
43 704 Vial Sant Jordi, s/n  
44  
45 705 08232 Viladecavalls, Barcelona, Spain  
46  
47 706  
48  
49 707 Mar Olga Pérez-Moreno  
50  
51 708 Àrea de Microbiologia, Laboratori Clínic ICS - Terres de l'Ebre  
52  
53 709 Hospital Verge de la Cinta  
54  
55 710 C/ de les Esplanetes, 14  
56  
57 711 43500 Tortosa, Tarragona, Spain  
58  
59  
60

1  
2  
3 712  
4  
5 713 Tomas Pumarola  
6  
7 714 Servei de Microbiologia  
8  
9 715 Hospital Universitari Vall d'Hebron  
10  
11 716 Pg. De la Vall d'Hebron, 119-129  
12  
13 717 08035 Barcelona, Spain  
14  
15 718  
16  
17 719 Juanjo Gonzales  
18  
19 720 Servei de Microbiologia  
20  
21 721 Hospital Universitari Vall d'Hebron  
22  
23 722 Pg. De la Vall d'Hebron, 119-129  
24  
25 723 08035 Barcelona, Spain  
26  
27 724  
28  
29 725 Xavier Raga  
30  
31 726 Laboratori de Microbiologia  
32  
33 727 Hospital Sant Pau i Santa Tecla  
34  
35 728 Rambla Vella, 14  
36  
37 729 43003 Tarragona, Spain  
38  
39 730  
40  
41 731 Mercè Garcia  
42  
43 732 Secció Microbiologia, Servei d'Anàlisis Clíniques  
44  
45 733 Hospital Universitari Arnau de Vilanova de Lleida  
46  
47 734 Av. Rovira Roure, 80  
48  
49 735 25198 Lleida, Barcelona, Spain  
50  
51 736  
52  
53 737 Mercè Ribelles  
54  
55 738 Secció Microbiologia, Servei d'Anàlisis Clíniques  
56  
57 739 Hospital Universitari Arnau de Vilanova de Lleida  
58  
59  
60

1  
2  
3 740 Av. Rovira Roure, 80  
4  
5 741 25198 Lleida, Barcelona, Spain  
6  
7 742  
8  
9 743 Esther Sanfeliu  
10  
11 744 Servei d'Anàlisis Clíniques, Secció de Microbiologia  
12  
13 745 Hospital d'Olot Comarcal de la Garrotxa  
14  
15 746 Av. dels Països Catalans, 86  
16  
17 747 17800 Olot, Girona, Spain  
18  
19 748  
20  
21  
22 749 Goretti Sauca  
23  
24 750 Servei d'Anàlisis clíniques, secció de Microbiologia  
25  
26 751 Hospital de Mataró  
27  
28 752 Ctra. de Cirera, 230  
29  
30 753 08304 Mataró, Barcelona, Spain  
31  
32 754  
33  
34 755 Dionisia Fontanals  
35  
36 756 Secció de Microbiologia  
37  
38 757 Parc Taulí Hospital Universitari, Institut d'Investigació i Innovació Parc Taulí I3PT, UAB  
39  
40 758 C/ Parc del Taulí, 1  
41  
42 759 08208 Sabadell, Barcelona, Spain  
43  
44 760 Isabel Sanfeliu  
45  
46 761 Secció de Microbiologia  
47  
48 762 Parc Taulí Hospital Universitari, Institut d'Investigació i Innovació Parc Taulí I3PT, UAB  
49  
50 763 C/ Parc del Taulí, 1  
51  
52 764 08208 Sabadell, Barcelona, Spain  
53  
54 765  
55  
56 766 Anna Vilamala  
57  
58 767 Servei de Microbiologia  
59  
60

- 1  
2  
3 768 Consorci Hospitalari de Vic  
4  
5 769 C/ Francesc Pla 'El Vigatà', 1  
6  
7 770 08500 Vic, Barcelona, Spain  
8  
9 771  
10  
11 772 **The Working Group of the Epidemiological Surveillance Network of Catalonia is composed**  
12  
13 773 **by:**  
14  
15 774 César Arias  
16  
17 775 Servei de Vigilància Epidemiològica i Resposta a Emergències de Salut Pública al Vallès  
18  
19 776 Occidental i Vallès Oriental  
20  
21 777 Carretera de Vallvidrera, 38 (CAP Turó de Can Mates)  
22  
23 778 08173 Sant Cugat del Vallès, Spain  
24  
25 779  
26  
27 780 Irene Barrabeig  
28  
29 781 Servei de Vigilància Epidemiològica i Resposta a Emergències de Salut Pública a Barcelona Sud  
30  
31 782 Carrer de la Feixa Llarga, s/n, Antiga Escola d'Infermeria, 3a. planta (Hospital Universitari de  
32  
33 783 Bellvitge)  
34  
35 784 08907 L'Hospitalet de Llobregat, Spain  
36  
37 785  
38  
39 786 Neus Camps  
40  
41 787 Servei de Vigilància Epidemiològica i Resposta a Emergències de Salut Pública a Girona  
42  
43 788 Plaça de Pompeu Fabra, 1  
44  
45 789 17002 Girona, Spain  
46  
47 790  
48  
49 791 Mònica Carol  
50  
51 792 Servei de Vigilància Epidemiològica i Resposta a Emergències de Salut Pública a la Catalunya  
52  
53 793 Central  
54  
55 794 Carrer Muralla de Sant Francesc, 49 4a planta - Edifici Pere III  
56  
57 795 08241 Manresa, Spain  
58  
59  
60

- 1  
2  
3 796  
4  
5 797 Núria Follia  
6  
7 798 Servei de Vigilància Epidemiològica i Resposta a Emergències de Salut Pública a Girona  
8  
9 799 Plaça de Pompeu Fabra, 1  
10  
11 800 17002 Girona, Spain  
12  
13 801  
14  
15 802 Pere Godoy  
16  
17 803 Servei de Vigilància Epidemiològica i Resposta a Emergències de Salut Pública a Lleida i Alt  
18  
19 804 Pirineu i Aran  
20  
21 805 Avinguda de l'Alcalde Rovira Roure, 2  
22  
23 806 25006 Lleida, Spain  
24  
25 807  
26  
27 808 Ana Martínez  
28  
29 809 Sub-direcció General de Vigilància i Resposta a Emergències de Salut Pública  
30  
31 810 Agència de Salut Pública de Catalunya, Generalitat de Catalunya  
32  
33 811 C/ Roc Boronat, 81-95  
34  
35 812 08005 Barcelona, Spain  
36  
37 813  
38  
39 814 Sofia Minguell  
40  
41 815 Servei de Vigilància Epidemiològica i Resposta a Emergències de Salut Pública al Camp de  
42  
43 816 Tarragona i Terres de l'Ebre  
44  
45 817 Avinguda de la Reina Maria Cristina, 54  
46  
47 818 43002 Tarragona, Spain  
48  
49 819  
50  
51 820 Ignasi Parron  
52  
53 821 Servei de Vigilància Epidemiològica i Resposta a Emergències de Salut Pública al Barcelonès  
54  
55 822 Nord i Maresme  
56  
57 823 C/ Roc Boronat, 81-95  
58  
59  
60

- 1  
2  
3 824 08005 Barcelona, Spain  
4  
5 825  
6  
7 826 M<sup>a</sup> Rosa Sala-Farré  
8  
9 827 Servei de Vigilància Epidemiològica i Resposta a Emergències de Salut Pública al Vallès  
10  
11 828 Occidental i Vallès Oriental  
12  
13 829 Carretera de Vallvidrera, 38 (CAP Turó de Can Mates)  
14  
15 830 08173 Sant Cugat del Vallès, Spain  
16  
17 831  
18  
19 832 Ariadna Rovira  
20  
21 833 Servei de Vigilància Epidemiològica i Resposta a Emergències de Salut Pública a Barcelona Sud  
22  
23 834 Carrer de la Feixa Llarga, s/n, Antiga Escola d'Infermeria, 3a. planta (Hospital Universitari de  
24  
25 835 Bellvitge)  
26  
27 836 08907 L'Hospitalet de Llobregat, Spain  
28  
29 837  
30  
31 838 Cristina Rius  
32  
33 839 Agència de Salut Pública de Barcelona  
34  
35 840 Plaça de Lesseps, 1  
36  
37 841 08023 Barcelona, Spain  
38  
39 842  
40  
41  
42  
43

#### 843 **References**

- 44  
45  
46 844 1. World Health Organization. Laboratory methods for the diagnosis of meningitis caused  
47  
48 845 by *Neisseria meningitidis*, *Streptococcus pneumoniae*, and *Haemophilus influenzae*:  
49  
50 846 WHO manual, 2nd ed. Geneve: WHO, 2011.  
51  
52  
53 847 2. 2 European Centre for Disease Prevention and Control. Invasive meningococcal  
54  
55 848 disease. In: ECDC. Annual epidemiological report for 2017. Stockholm: ECDC, 2019.  
56  
57 849 [meningococcal-disease.pdf](https://www.ecdc.europa.eu/sites/default/files/documents/AER_for_2017-invasive-<br/>58<br/>59 850 <a href=) (Last accessed 27 January 2021)

- 1  
2  
3 851 3. Diez Izquierdo L, Martínez Sánchez EV, Amillategui dos Santos R, Cano Portero R.  
4  
5 852 Enfermedad meningocócica en España. Análisis de la temporada 2016-2017. Bol  
6  
7 853 Epidemiol Sem 2018;26:59-68.  
8  
9 854 <http://revista.isciii.es/index.php/bes/article/view/1063/1314>.  
10
- 11 855 4. Centers for Disease Control and Prevention (CDC). Epidemiology and prevention of  
12  
13 856 vaccine-preventable diseases. Washington DC: Public Health Foundation, 2015.
- 14  
15 857 5. Edmond K, Clark A, Korczak VS, Sanderson C, Griffiths UK, Rudan I. Global and  
16  
17 858 regional risk of disabling sequelae from bacterial meningitis: a systematic review and  
18  
19 859 meta-analysis. *Lancet Infect Dis* 2010;10:317-28.
- 20  
21 860 6. CDC Guidelines Working Group. Updated guidelines for evaluating public health  
22  
23 861 surveillance systems. *Morb Mortal Wkly Rep* 2001;50:1–35.
- 24  
25 862 7. WHO. Protocol for the evaluation of epidemiological surveillance systems.  
26  
27 863 <https://apps.who.int/iris/handle/10665/63639> (Last accessed 6 September 2020).
- 28  
29 864 8. Romaguera RA, German RR, Klaucke DN. Evaluating public health surveillance. In:  
30  
31 865 Teutsch SM, Churchill RE, eds. Principles and practice of public health surveillance.  
32  
33 866 New York: Oxford University Press, 2000: 176–193
- 34  
35 867 9. Generalitat de Catalunya. Decret 2013/2015, de 15 de setembre, pel qual es crea la  
36  
37 868 Xarxa de Vigilància Epidemiològica i es regulen els sistemes de notificació de malalties  
38  
39 869 de declaració obligatòria i els brots epidèmics. *DOGC* 2015;6958:1-19.
- 40  
41 870 10. Laska EM. The use of capture-recapture methods in public health. *Bull World Health*  
42  
43 871 *Organ* 2002;80:845.
- 44  
45 872 11. Freixa Blanxart M, Guàrdia Olmos J, Honrubia Serrano ML, Però Cebollero. Validation  
46  
47 873 of the capture –recapture method. *Psichotema* 2000;12(Suppl 2):231-5.
- 48  
49 874 12. Statistical Institute of Catalonia. Statistical Institute of Catalonia. 2015.  
50  
51 875 <https://www.idescat.cat> (Last accessed 18 January 2019)
- 52  
53 876 13. Generalitat de Catalunya. Manual de notificació per als declarants al sistema de  
54  
55 877 notificació de malalties de declaració obligatòria (MDO). 2016.
- 56  
57  
58  
59  
60

- 1  
2  
3 878 [https://canalsalut.gencat.cat/web/.content/\\_Professionals/Vigilancia\\_epidemiologica/do](https://canalsalut.gencat.cat/web/.content/_Professionals/Vigilancia_epidemiologica/documents/arxius/MANUAL_MDO_2016.pdf)  
4  
5 879 [cuments/arxius/MANUAL\\_MDO\\_2016.pdf](https://canalsalut.gencat.cat/web/.content/_Professionals/Vigilancia_epidemiologica/documents/arxius/MANUAL_MDO_2016.pdf) (Last accessed 27 January 2021).  
6  
7 880 14. Generalitat de Catalunya. Manual de procediment de notificació microbiològica  
8  
9 881 obligatòria (SNMC). 2016.  
10  
11 882 [https://canalsalut.gencat.cat/web/.content/\\_Professionals/Vigilancia\\_epidemiologica/do](https://canalsalut.gencat.cat/web/.content/_Professionals/Vigilancia_epidemiologica/documents/arxius/manual_procediment.pdf)  
12  
13 883 [cuments/arxius/manual\\_procediment.pdf](https://canalsalut.gencat.cat/web/.content/_Professionals/Vigilancia_epidemiologica/documents/arxius/manual_procediment.pdf) (last accessed 27 January 2021).  
14  
15 884 15. Ciruela P, Izquierdo C, Broner S et al. Epidemiology of invasive pneumococcal disease  
16  
17 885 in Catalonia Report 2012-2016. Generalitat de Catalunya 2018.  
18  
19 886 [https://canalsalut.gencat.cat/web/.content/\\_Professionals/Vigilancia\\_epidemiologica/do](https://canalsalut.gencat.cat/web/.content/_Professionals/Vigilancia_epidemiologica/documents/arxius/invasive_pneumococcal_2012_2016_ang.pdf)  
20  
21 887 [cuments/arxius/invasive\\_pneumococcal\\_2012\\_2016\\_ang.pdf](https://canalsalut.gencat.cat/web/.content/_Professionals/Vigilancia_epidemiologica/documents/arxius/invasive_pneumococcal_2012_2016_ang.pdf) (Last accessed 27 January  
22  
23 888 2021).  
24  
25 889 16. Chapman DG. Some properties of the hypergeometric distribution with applications to  
26  
27 890 zoological sample censuses. Berkeley: University of California Press, 1951.  
28  
29 891 17. Ballivet S, Salmi LR, Dubourdieu D. Capture-recapture method to determine the best  
30  
31 892 design of surveillance system. Application to a thyroid cancer registry. Eur J Epidemiol  
32  
33 893 2000;16:147-53.  
34  
35 894 18. Tilling K, Sterne JAC, Wolfe CDA. Estimation of the incidence of stroke using a  
36  
37 895 capture-recapture model including covariates. Int J Epidemiol 2001;30:1351-9.  
38  
39 896 19. Alho JM. Logistic regression in capture-recapture models. Biometrics 1999;149:392-  
40  
41 897 400.  
42  
43 898 20. Tilling K, Sterne JAC. Capture-recapture models including covariate effects. Am J  
44  
45 899 Epidemiol 1999;149:392-400.  
46  
47 900 21. Maldonado G, Greenland S. Simulation study of confounder-selection strategies. Am J  
48  
49 901 Epidemiol 1993;138:923-36.  
50  
51 902 22. LaPorte RE, Dearwater SR, Chang Y-F et al. Efficiency and accuracy of disease  
52  
53 903 monitoring systems: Applications of capture-recapture methods to injury monitoring.  
54  
55 904 Am J Epidemiol 1995;142:1069-77.  
56  
57  
58  
59  
60



- 1  
2  
3 905 23. Baldovin T, Lazzari R, Cocchio S et al. Invasive meningococcal disease in the Veneto  
4 region of Italy: a capture-recapture analysis for assessing the effectiveness of an  
5 906  
6 integrated surveillance system. *BMJ Open* 2017;7:e012478.  
7 907  
8  
9 908 24. Jansson A, Arneborn M, Ekdahl K. Sensitivity of the Swedish statutory surveillance  
10 system for communicable diseases 1998-2002, assessed by the capture-recapture  
11 909  
12 method. *Epidemiol Infect* 2005;133:401-7.  
13 910  
14  
15 911 25. Berghold C, Berghold A, Fülöp G, Heuberger S, Strauss R, Zenz W. Invasive  
16 meningococcal disease in Austria 2002: assessment of completeness of notification by  
17 912  
18 comparison of two independent data sources. *Wien Klin Wochenschr* 2006;118:31-5.  
19 913  
20  
21 914 26. Gibson A, Jorm L, McIntyre P. Using linked birth, notification, hospital and mortality  
22 data to examine false-positive meningococcal disease reporting and adjust disease  
23 915  
24 incidence estimates for children in New South Wales, Australia. *Epidemiol Infect*  
25 916  
26 2015;143:2570-9.  
27 917  
28  
29 918 27. Vázquez J A, Taha M K, Findlow J, Gupta S, Borrow R. Global Meningococcal  
30 initiative: guidelines for diagnosis and confirmation of invasive meningococcal disease.  
31 919  
32 *Epidemiol Infect* 2016;144:3052-7.  
33 920  
34  
35 921 28. Ratnayake R, Allard R. Challenges to the surveillance of meningococcal disease in an  
36 era of declining incidence in Montréal, Quebec. *Can J Public Health* 2013;104:e335-  
37 922  
38 e339.  
39 923  
40  
41 924 29. O'Lorcain P, Bennett DE, Morgan SL et al. A retrospective assessment of the  
42 completeness and timeliness of meningococcal disease notifications in the Republic of  
43 925  
44 Ireland over a 16-year period, 1999-2015. *Public Health* 2018;156:44-51.  
45 926  
46  
47 927 30. Carmona G, Vilaró M, Ciruela P et al. Hepatitis A surveillance: sensitivity of two  
48 information sources. *BMC Infect Dis* 2018;18:633.  
49 928  
50  
51 929  
52  
53  
54  
55  
56  
57 930  
58  
59  
60

1  
2  
3 931 Figure 1. Sensitivities of the SDR and MRS stratified by age groups. Catalonia 2011-2015  
4

5 932 Figure 2. Sensitivities of the SDR and MRS stratified by year of reporting, Catalonia 2011-2015  
6

7 933  
8  
9  
10  
11  
12  
13  
14  
15  
16  
17  
18  
19  
20  
21  
22  
23  
24  
25  
26  
27  
28  
29  
30  
31  
32  
33  
34  
35  
36  
37  
38  
39  
40  
41  
42  
43  
44  
45  
46  
47  
48  
49  
50  
51  
52  
53  
54  
55  
56  
57  
58  
59  
60

For peer review only

1  
2  
3  
4  
5  
6  
7  
8  
9  
10  
11  
12  
13  
14  
15  
16  
17  
18  
19  
20  
21  
22  
23  
24  
25  
26  
27  
28  
29  
30  
31  
32  
33  
34  
35  
36  
37  
38  
39  
40  
41  
42  
43  
44  
45  
46  
47  
48  
49  
50  
51  
52  
53  
54  
55  
56  
57  
58  
59  
60

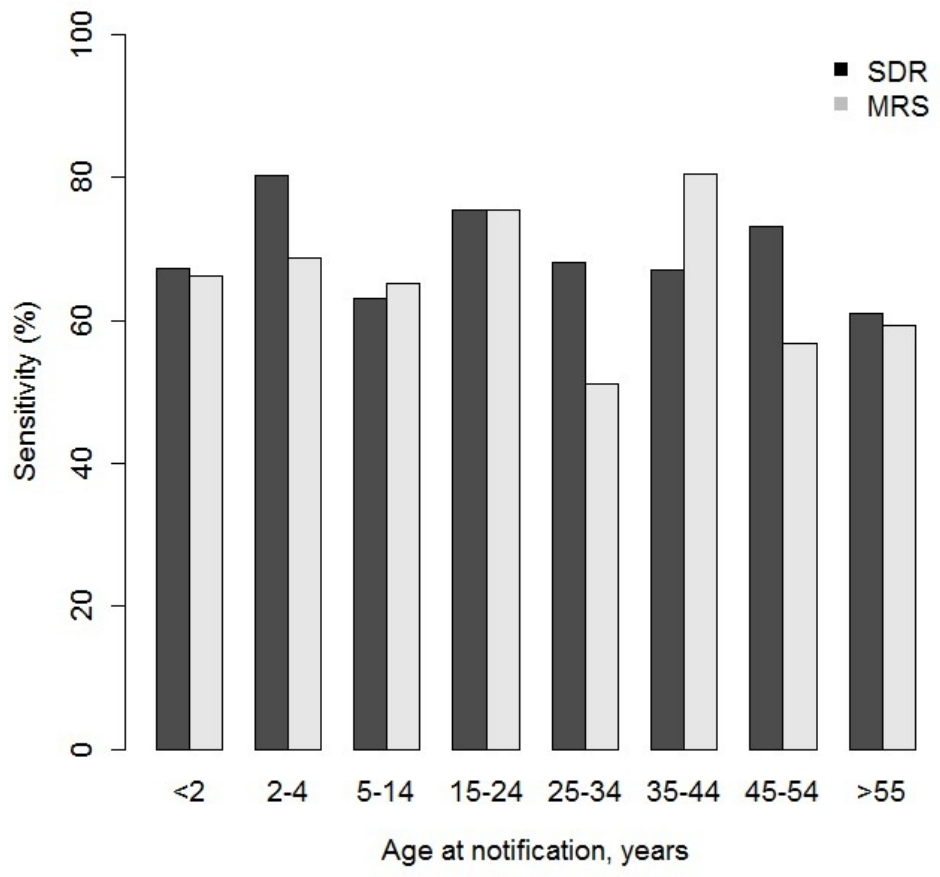

Figure 1. Sensitivities of the SDR and MRS stratified by age groups. Catalonia 2011-2015

176x172mm (96 x 96 DPI)

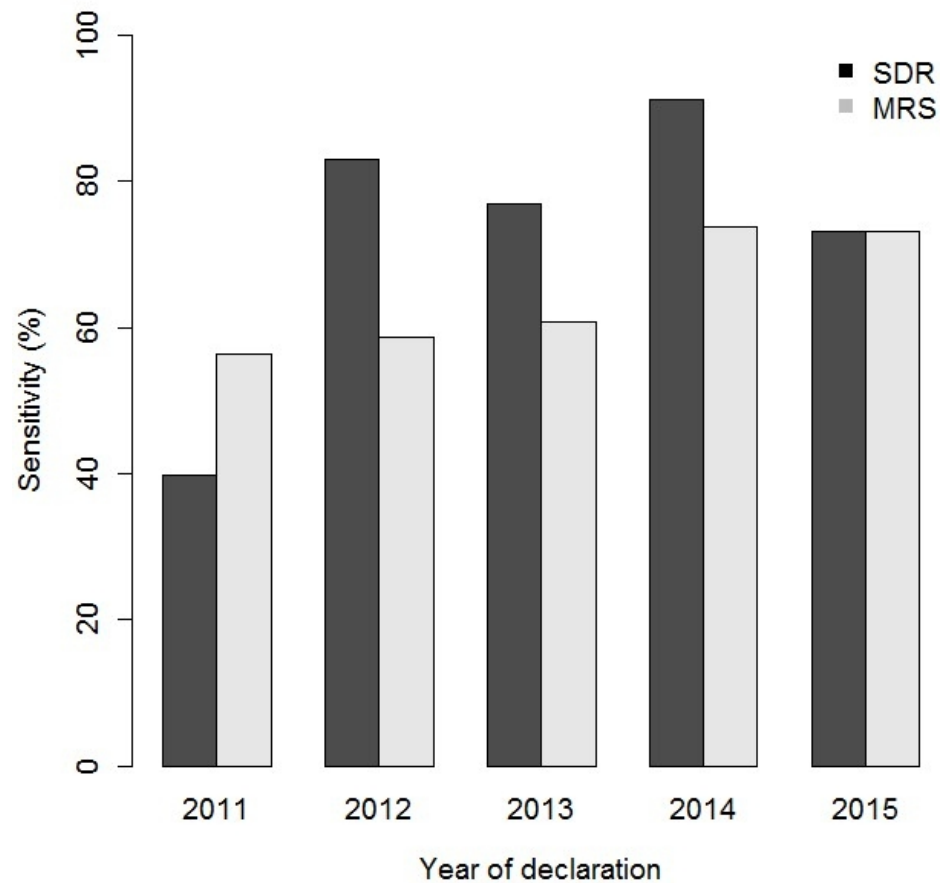

Figure 2. Sensitivities of the SDR and MRS stratified by year of reporting, Catalonia 2011-2015

172x172mm (96 x 96 DPI)

Supplementary table 1. Capture–recapture analysis of serogroup B meningococcal invasive disease reported to the SDR and MRS stratified by different characteristics, Catalonia 2011-2015

|                                 | No. records in SDR | No. records in MRS | Matched records | Calculated unreported cases | Estimated total no. of cases (95% CI) | Sensitivity SDR (%) (95% CI) | Sensitivity MRS (%) (95% CI) | Difference in sensitivities (%) | P-value          |
|---------------------------------|--------------------|--------------------|-----------------|-----------------------------|---------------------------------------|------------------------------|------------------------------|---------------------------------|------------------|
| <b>All cases</b>                | 164                | 153                | 114             | 17                          | 220 (209, 232)                        | 74.6 (68.8, 80.3)            | 69.6 (63.5, 75.6)            | 5.0                             | <b>&lt;0.001</b> |
| <b>Age group</b>                |                    |                    |                 |                             |                                       |                              |                              |                                 |                  |
| <15 years                       | 110                | 110                | 78              | 13                          | 155 (146, 165)                        | 71.0 (63.8, 78.1)            | 71.0 (63.8, 78.1)            | 0.0                             | 0.656            |
| ≥15 years                       | 53                 | 42                 | 35              | 4                           | 64 (59, 69)                           | 83.5 (74.3, 92.6)            | 66.1 (54.5, 77.8)            | 17.3                            |                  |
| <b>Sex</b>                      |                    |                    |                 |                             |                                       |                              |                              |                                 |                  |
| Male                            | 86                 | 76                 | 62              | 6                           | 106 (100, 112)                        | 81.7 (74.3, 89.1)            | 72.2 (63.6, 80.7)            | 9.5                             | 0.099            |
| Female                          | 78                 | 77                 | 52              | 13                          | 116 (106, 126)                        | 67.7 (59.1, 76.2)            | 66.8 (58.2, 75.4)            | 0.9                             |                  |
| <b>Year of report</b>           |                    |                    |                 |                             |                                       |                              |                              |                                 |                  |
| 2011-2013                       | 95                 | 91                 | 60              | 18                          | 144 (132, 157)                        | 66.1 (58.3, 73.8)            | 63.3 (55.4, 71.2)            | 2.8                             | <b>0.002</b>     |
| 2014-2015                       | 69                 | 62                 | 54              | 3                           | 80 (76, 83)                           | 87.1 (79.7, 94.5)            | 78.3 (69.2, 87.4)            | 8.8                             |                  |
| <b>Size of municipality</b>     |                    |                    |                 |                             |                                       |                              |                              |                                 |                  |
| <10,000 people                  | 22                 | 24                 | 20              | 1                           | 27 (26, 28)                           | 83.3 (69.1, 97.6)            | 90.9 (79.9, 100.0)           | -7.6                            | 0.059            |
| ≥10,000 people                  | 137                | 114                | 91              | 12                          | 172 (163, 181)                        | 79.9 (73.9, 85.9)            | 66.5 (59.4, 73.5)            | 13.4                            |                  |
| <b>Country of birth</b>         |                    |                    |                 |                             |                                       |                              |                              |                                 |                  |
| Spain                           | 152                | 144                | 107             | 16                          | 205 (194, 215)                        | 74.4 (68.4, 80.4)            | 70.4 (64.2, 76.7)            | 3.9                             | 0.631            |
| Other countries                 | 12                 | 9                  | 7               | 2                           | 16 (13, 19)                           | 78.9 (58.4, 99.5)            | 59.2 (34.5, 83.9)            | 19.7                            |                  |
| <b>Number of hospital beds</b>  |                    |                    |                 |                             |                                       |                              |                              |                                 |                  |
| <200                            | 49                 | 52                 | 33              | 9                           | 77 (69, 86)                           | 63.7 (53.0, 74.5)            | 67.6 (57.2, 78.1)            | -3.9                            | 0.095            |
| ≥200                            | 113                | 101                | 81              | 8                           | 141 (134, 148)                        | 80.3 (73.7, 86.8)            | 71.7 (64.3, 79.2)            | 8.5                             |                  |
| <b>Clinical form</b>            |                    |                    |                 |                             |                                       |                              |                              |                                 |                  |
| Meningitis                      | 91                 | 100                | 70              | 9                           | 130 (122, 138)                        | 70.1 (62.2, 77.9)            | 77.0 (69.7, 84.2)            | -6.9                            | 0.972            |
| Sepsis                          | 66                 | 51                 | 43              | 5                           | 79 (73, 84)                           | 84.4 (76.4, 92.4)            | 65.2 (54.7, 75.8)            | 19.2                            |                  |
| <b>Type of reporting centre</b> |                    |                    |                 |                             |                                       |                              |                              |                                 |                  |
| Private                         | 14                 | 1                  | 1               | 0                           | 14 (14, 14)                           | 100 (100, 100)               | 7.1 (-6.4, 20.6)             | 92.9                            | <b>0.004</b>     |
| Public                          | 149                | 152                | 113             | 13                          | 201 (192, 210)                        | 74.4 (68.4, 80.4)            | 75.9 (70, 81.8)              | -1.5                            |                  |

SDR: Statutory disease reporting; MDR: Microbiological reporting system

Supplementary table 2. Capture–recapture analysis of serogroup C meningococcal invasive disease reported to the SDR and MRS stratified by different characteristics, Catalonia 2011-2015

|                                 | No. records in SDR | No. records in MRS | Matched records | Calculated unreported cases | Estimated total no. of cases (95% CI) | Sensitivity SDR (%) (95% CI) | Sensitivity MRS (%) (95% CI) | Difference in sensitivities (%) | p-value      |
|---------------------------------|--------------------|--------------------|-----------------|-----------------------------|---------------------------------------|------------------------------|------------------------------|---------------------------------|--------------|
| <b>All cases</b>                | 26                 | 21                 | 16              | 3                           | 34 (30, 39)                           | 76.7 (62.5, 90.9)            | 62.0 (45.6, 78.3)            | 14.8                            | <b>0.035</b> |
| <b>Age group</b>                |                    |                    |                 |                             |                                       |                              |                              |                                 |              |
| <15 years                       | 4                  | 4                  | 4               | 0                           | 4 (4, 4)                              | 100.0 (100.0, 100.0)         | 100.0 (100.0, 100.0)         | 0.0                             | 0.992        |
| ≥15 years                       | 22                 | 17                 | 12              | 4                           | 31 (25, 37)                           | 71.4 (55.5, 87.4)            | 55.2 (37.6, 72.8)            | 16.2                            |              |
| <b>Sex</b>                      |                    |                    |                 |                             |                                       |                              |                              |                                 |              |
| Male                            | 13                 | 11                 | 7               | 3                           | 20 (15, 26)                           | 65.0 (44.1, 85.9)            | 55.0 (33.2, 76.8)            | 10.0                            | 0.368        |
| Female                          | 13                 | 10                 | 9               | 1                           | 15 (13, 16)                           | 90.3 (75.0, 100.0)           | 69.4 (45.7, 93.2)            | 20.8                            |              |
| <b>Year of report</b>           |                    |                    |                 |                             |                                       |                              |                              |                                 |              |
| 2011-2013                       | 12                 | 10                 | 6               | 4                           | 20 (14, 26)                           | 61.9 (40.2, 83.5)            | 51.6 (29.3, 73.8)            | 10.3                            | 0.110        |
| 2014-2015                       | 14                 | 11                 | 10              | 1                           | 16 (14, 17)                           | 90.9 (76.6, 100.0)           | 71.4 (48.9, 94.0)            | 19.5                            |              |
| <b>Size of municipality</b>     |                    |                    |                 |                             |                                       |                              |                              |                                 |              |
| <10,000 people                  | 3                  | 2                  | 2               | 0                           | 3 (3, 3)                              | 100.0 (100.0, 100.0)         | 66.7 (13.3, 100.0)           | 33.3                            | 0.591        |
| ≥10,000 people                  | 21                 | 15                 | 12              | 3                           | 27 (23, 30)                           | 80.5 (65.3, 95.7)            | 57.5 (38.5, 76.4)            | 23.0                            |              |
| <b>Country of birth</b>         |                    |                    |                 |                             |                                       |                              |                              |                                 |              |
| Spain                           | 22                 | 19                 | 14              | 3                           | 30 (26, 35)                           | 74.1 (58.3, 89.8)            | 64.0 (46.7, 81.2)            | 10.1                            | 0.945        |
| Other countries                 | 4                  | 2                  | 2               | 0                           | 4 (4, 4)                              | 100.0 (100.0, 100.0)         | 50.0 (1.0, 99.0)             | 50.0                            |              |
| <b>Number of hospital beds</b>  |                    |                    |                 |                             |                                       |                              |                              |                                 |              |
| <200                            | 7                  | 5                  | 5               | 0                           | 7 (7, 7)                              | 100.0 (100.0, 100.0)         | 71.4 (38.0, 104.9)           | 28.6                            | 0.283        |
| ≥200                            | 18                 | 16                 | 11              | 3                           | 26 (22, 31)                           | 69.5 (51.8, 87.2)            | 61.8 (43.1, 80.5)            | 7.7                             |              |
| <b>Clinical form</b>            |                    |                    |                 |                             |                                       |                              |                              |                                 |              |
| Meningitis                      | 16                 | 16                 | 11              | 3                           | 24 (20, 27)                           | 69.3 (50.4, 88.1)            | 69.3 (50.4, 88.1)            | 0.0                             | 0.908        |
| Sepsis                          | 8                  | 4                  | 4               | 0                           | 8 (8, 8)                              | 100.0 (100.0, 100.0)         | 50.0 (15.4, 84.7)            | 50.0                            |              |
| <b>Type of reporting centre</b> |                    |                    |                 |                             |                                       |                              |                              |                                 |              |
| Private                         | 4                  | 0                  | 0               | 0                           | 4 (4, 4)                              | 100.0 (100.0, 100.0)         | 0 (0.0, 0.0)                 | 100                             | 0.992        |
| Public                          | 22                 | 21                 | 16              | 2                           | 29 (26, 33)                           | 76.4 (60.9, 91.9)            | 72.9 (56.7, 89.2)            | 3.5                             |              |

SDR: Statutory disease reporting; MDR: Microbiological reporting system

**Supplementary table 3. Capture–recapture analysis of all deaths due to meningococcal invasive disease reported to the SDR and MRS stratified by different characteristics, Catalonia 2011-2015**

|                                 | No. records in SDR | No. records in MRS | Matched records | Calculated unreported cases | Estimated total no. of cases (95% CI) | Sensitivity SDR (%) (95% CI) | Sensitivity MRS (%) (95% CI) | Difference in sensitivities (%) | P-value |
|---------------------------------|--------------------|--------------------|-----------------|-----------------------------|---------------------------------------|------------------------------|------------------------------|---------------------------------|---------|
| <b>All cases</b>                | 22                 | 11                 | 11              | 0                           | 22 (22, 22)                           | 100.0 (100.0, 100.0)         | 50.0 (29.1, 70.9)            | 50.0                            | 0.104   |
| <b>Age group</b>                |                    |                    |                 |                             |                                       |                              |                              |                                 |         |
| <15 years                       | 6                  | 4                  | 4               | 0                           | 6 (6, 6)                              | 100.0 (100.0, 100.0)         | 66.7 (28.9, 100.0)           | 33.3                            | 0.346   |
| ≥15 years                       | 16                 | 7                  | 7               | 0                           | 16 (16, 16)                           | 100.0 (100.0, 100.0)         | 43.8 (19.4, 68.1)            | 56.3                            |         |
| <b>Sex</b>                      |                    |                    |                 |                             |                                       |                              |                              |                                 |         |
| Male                            | 16                 | 7                  | 7               | 0                           | 16 (16, 16)                           | 100.0 (100.0, 100.0)         | 43.8 (19.4, 68.1)            | 56.2                            | 0.346   |
| Female                          | 6                  | 4                  | 4               | 0                           | 6 (6, 6)                              | 100.0 (100.0, 100.0)         | 66.7 (29.0, 100.0)           | 33.3                            |         |
| <b>Year of report</b>           |                    |                    |                 |                             |                                       |                              |                              |                                 |         |
| 2011-2013                       | 16                 | 6                  | 6               | 0                           | 16 (16, 16)                           | 100.0 (100.0, 100.0)         | 31.3 (8.5, 54.0)             | 68.8                            | 0.080   |
| 2014-2015                       | 6                  | 5                  | 5               | 0                           | 6 (6, 6)                              | 100.0 (100.0, 100.0)         | 83.3 (53.5, 100.0)           | 16.7                            |         |
| <b>Size of municipality</b>     |                    |                    |                 |                             |                                       |                              |                              |                                 |         |
| <10,000 people                  | 3                  | 3                  | 3               | 0                           | 3 (3, 3)                              | 100.0 (100.0, 100.0)         | 100.0 (100.0, 100.0)         | 0.0                             | 0.991   |
| ≥10,000 people                  | 19                 | 8                  | 8               | 0                           | 19 (19, 19)                           | 100.0 (100.0, 100.0)         | 42.1 (19.9, 64.3)            | 57.9                            |         |
| <b>Country of birth</b>         |                    |                    |                 |                             |                                       |                              |                              |                                 |         |
| Spain                           | 20                 | 10                 | 10              | 0                           | 20 (20, 20)                           | 100.0 (100.0, 100.0)         | 50.0 (28.1, 71.9)            | 50.0                            | 1.000   |
| Other countries                 | 2                  | 1                  | 1               | 0                           | 2 (2, 2)                              | 100.0 (100.0, 100.0)         | 50.0 (0.0, 100.0)            | 50.0                            |         |
| <b>Number of hospital beds</b>  |                    |                    |                 |                             |                                       |                              |                              |                                 |         |
| <200                            | 4                  | 2                  | 2               | 0                           | 4 (4, 4)                              | 100.0 (100.0, 100.0)         | 50.0 (1.0, 99.0)             | 50.0                            | 0.822   |
| ≥200                            | 16                 | 9                  | 9               | 0                           | 16 (16, 16)                           | 100.0 (100.0, 100.0)         | 56.3 (31.9, 80.6)            | 43.7                            |         |
| <b>Clinical form</b>            |                    |                    |                 |                             |                                       |                              |                              |                                 |         |
| Meningitis                      | 7                  | 4                  | 4               | 0                           | 7 (7, 7)                              | 100.0 (100.0, 100.0)         | 57.1 (20.5, 93.8)            | 42.9                            | 0.648   |
| Sepsis                          | 15                 | 7                  | 7               | 0                           | 15 (15, 15)                           | 100.0 (100.0, 100.0)         | 46.7 (21.4, 71.9)            | 53.3                            |         |
| <b>Type of reporting centre</b> |                    |                    |                 |                             |                                       |                              |                              |                                 |         |
| Private                         | 2                  | 0                  | 0               | 0                           | 2 (2, 2)                              | 100.0 (100.0, 100.0)         | 0 (0.0, 0.0)                 | 100                             | 0.992   |
| Public                          | 20                 | 11                 | 11              | 0                           | 20 (20, 20)                           | 100.0 (100.0, 100.0)         | 55 (33.2, 76.8)              | 45                              |         |

SDR: Statutory disease reporting; MDR: Microbiological reporting system

1  
2  
3  
4  
5  
6  
7  
8  
9  
10  
11  
12  
13  
14  
15  
16  
17  
18  
19  
20  
21  
22  
23  
24  
25  
26  
27  
28  
29  
30  
31  
32  
33  
34  
35  
36  
37  
38  
39  
40  
41  
42  
43  
44  
45  
46

For peer review only



## STROBE Statement—checklist of items that should be included in reports of observational studies

|                              | Item No | Recommendation                                                                                                                                                                                                                                                                                                                                                                                                                                                         | Page No |
|------------------------------|---------|------------------------------------------------------------------------------------------------------------------------------------------------------------------------------------------------------------------------------------------------------------------------------------------------------------------------------------------------------------------------------------------------------------------------------------------------------------------------|---------|
| <b>Title and abstract</b>    | 1       | (a) Indicate the study's design with a commonly used term in the title or the abstract                                                                                                                                                                                                                                                                                                                                                                                 | 1       |
|                              |         | (b) Provide in the abstract an informative and balanced summary of what was done and what was found                                                                                                                                                                                                                                                                                                                                                                    | 5       |
| <b>Introduction</b>          |         |                                                                                                                                                                                                                                                                                                                                                                                                                                                                        |         |
| Background/rationale         | 2       | Explain the scientific background and rationale for the investigation being reported                                                                                                                                                                                                                                                                                                                                                                                   | 6       |
| Objectives                   | 3       | State specific objectives, including any prespecified hypotheses                                                                                                                                                                                                                                                                                                                                                                                                       | 7       |
| <b>Methods</b>               |         |                                                                                                                                                                                                                                                                                                                                                                                                                                                                        |         |
| Study design                 | 4       | Present key elements of study design early in the paper                                                                                                                                                                                                                                                                                                                                                                                                                | 7       |
| Setting                      | 5       | Describe the setting, locations, and relevant dates, including periods of recruitment, exposure, follow-up, and data collection                                                                                                                                                                                                                                                                                                                                        | 7,8     |
| Participants                 | 6       | (a) <i>Cohort study</i> —Give the eligibility criteria, and the sources and methods of selection of participants. Describe methods of follow-up<br><i>Case-control study</i> —Give the eligibility criteria, and the sources and methods of case ascertainment and control selection. Give the rationale for the choice of cases and controls<br><i>Cross-sectional study</i> —Give the eligibility criteria, and the sources and methods of selection of participants | 7,8     |
|                              |         | (b) <i>Cohort study</i> —For matched studies, give matching criteria and number of exposed and unexposed<br><i>Case-control study</i> —For matched studies, give matching criteria and the number of controls per case                                                                                                                                                                                                                                                 |         |
| Variables                    | 7       | Clearly define all outcomes, exposures, predictors, potential confounders, and effect modifiers. Give diagnostic criteria, if applicable                                                                                                                                                                                                                                                                                                                               | 8,9     |
| Data sources/<br>measurement | 8*      | For each variable of interest, give sources of data and details of methods of assessment (measurement). Describe comparability of assessment methods if there is more than one group                                                                                                                                                                                                                                                                                   | 8,9     |
| Bias                         | 9       | Describe any efforts to address potential sources of bias                                                                                                                                                                                                                                                                                                                                                                                                              | 9       |
| Study size                   | 10      | Explain how the study size was arrived at                                                                                                                                                                                                                                                                                                                                                                                                                              | 8       |
| Quantitative<br>variables    | 11      | Explain how quantitative variables were handled in the analyses. If applicable, describe which groupings were chosen and why                                                                                                                                                                                                                                                                                                                                           | 8       |
| Statistical methods          | 12      | (a) Describe all statistical methods, including those used to control for confounding                                                                                                                                                                                                                                                                                                                                                                                  | 8,9     |
|                              |         | (b) Describe any methods used to examine subgroups and interactions                                                                                                                                                                                                                                                                                                                                                                                                    |         |
|                              |         | (c) Explain how missing data were addressed                                                                                                                                                                                                                                                                                                                                                                                                                            |         |
|                              |         | (d) <i>Cohort study</i> —If applicable, explain how loss to follow-up was addressed<br><i>Case-control study</i> —If applicable, explain how matching of cases and controls was addressed<br><i>Cross-sectional study</i> —If applicable, describe analytical methods taking account of sampling strategy                                                                                                                                                              |         |
|                              |         | (e) Describe any sensitivity analyses                                                                                                                                                                                                                                                                                                                                                                                                                                  |         |

Continued on next page

| <b>Results</b>           |     |                                                                                                                                                                                                                                                                                                                                                                                                               |          |
|--------------------------|-----|---------------------------------------------------------------------------------------------------------------------------------------------------------------------------------------------------------------------------------------------------------------------------------------------------------------------------------------------------------------------------------------------------------------|----------|
| Participants             | 13* | (a) Report numbers of individuals at each stage of study—eg numbers potentially eligible, examined for eligibility, confirmed eligible, included in the study, completing follow-up, and analysed<br>(b) Give reasons for non-participation at each stage<br>(c) Consider use of a flow diagram                                                                                                               | 10       |
| Descriptive data         | 14* | (a) Give characteristics of study participants (eg demographic, clinical, social) and information on exposures and potential confounders<br>(b) Indicate number of participants with missing data for each variable of interest<br>(c) <i>Cohort study</i> —Summarise follow-up time (eg, average and total amount)                                                                                           | 10       |
| Outcome data             | 15* | <i>Cohort study</i> —Report numbers of outcome events or summary measures over time<br><i>Case-control study</i> —Report numbers in each exposure category, or summary measures of exposure<br><i>Cross-sectional study</i> —Report numbers of outcome events or summary measures                                                                                                                             | 10       |
| Main results             | 16  | (a) Give unadjusted estimates and, if applicable, confounder-adjusted estimates and their precision (eg, 95% confidence interval). Make clear which confounders were adjusted for and why they were included<br>(b) Report category boundaries when continuous variables were categorized<br>(c) If relevant, consider translating estimates of relative risk into absolute risk for a meaningful time period | 10,11,12 |
| Other analyses           | 17  | Report other analyses done—eg analyses of subgroups and interactions, and sensitivity analyses                                                                                                                                                                                                                                                                                                                |          |
| <b>Discussion</b>        |     |                                                                                                                                                                                                                                                                                                                                                                                                               |          |
| Key results              | 18  | Summarise key results with reference to study objectives                                                                                                                                                                                                                                                                                                                                                      | 12,13    |
| Limitations              | 19  | Discuss limitations of the study, taking into account sources of potential bias or imprecision. Discuss both direction and magnitude of any potential bias                                                                                                                                                                                                                                                    | 15       |
| Interpretation           | 20  | Give a cautious overall interpretation of results considering objectives, limitations, multiplicity of analyses, results from similar studies, and other relevant evidence                                                                                                                                                                                                                                    | 14       |
| Generalisability         | 21  | Discuss the generalisability (external validity) of the study results                                                                                                                                                                                                                                                                                                                                         | 5,14,15  |
| <b>Other information</b> |     |                                                                                                                                                                                                                                                                                                                                                                                                               |          |
| Funding                  | 22  | Give the source of funding and the role of the funders for the present study and, if applicable, for the original study on which the present article is based                                                                                                                                                                                                                                                 | 16       |

\*Give information separately for cases and controls in case-control studies and, if applicable, for exposed and unexposed groups in cohort and cross-sectional studies.

**Note:** An Explanation and Elaboration article discusses each checklist item and gives methodological background and published examples of transparent reporting. The STROBE checklist is best used in conjunction with this article (freely available on the Web sites of PLoS Medicine at <http://www.plosmedicine.org/>, Annals of Internal Medicine at <http://www.annals.org/>, and Epidemiology at <http://www.epidem.com/>). Information on the STROBE Initiative is available at [www.strobe-statement.org](http://www.strobe-statement.org).

# BMJ Open

## Estimation of the incidence of invasive meningococcal disease using a capture-recapture model based on two independent surveillance systems in Catalonia, Spain

|                                 |                                                                                                                                                                                                                                                                                                                                                                                                                                                                                                                                                                                                                           |
|---------------------------------|---------------------------------------------------------------------------------------------------------------------------------------------------------------------------------------------------------------------------------------------------------------------------------------------------------------------------------------------------------------------------------------------------------------------------------------------------------------------------------------------------------------------------------------------------------------------------------------------------------------------------|
| Journal:                        | <i>BMJ Open</i>                                                                                                                                                                                                                                                                                                                                                                                                                                                                                                                                                                                                           |
| Manuscript ID                   | bmjopen-2021-058003.R1                                                                                                                                                                                                                                                                                                                                                                                                                                                                                                                                                                                                    |
| Article Type:                   | Original research                                                                                                                                                                                                                                                                                                                                                                                                                                                                                                                                                                                                         |
| Date Submitted by the Author:   | 13-Apr-2022                                                                                                                                                                                                                                                                                                                                                                                                                                                                                                                                                                                                               |
| Complete List of Authors:       | Ciruela, Pilar; Public Health Agency of Catalonia; CIBERESP<br>Vilaró, Marta; Universitat de Barcelona, Departament de Medicina; CIBERESP, Epidemiology and Public Health<br>Carmona, Gloria; Public Health Agency of Catalonia<br>Jané, Mireia; Public Health Agency of Catalonia, Public Health Surveillance<br>Soldevila, Núria; CIBERESP; Universitat de Barcelona, Departament de Medicina<br>García, Tomás; Generalitat de Catalunya<br>Hernández, Sergi; Generalitat de Catalunya<br>Ruiz, Laura; Generalitat de Catalunya<br>Dominguez, Angela; CIBERESP, Epidemiologia y Salud Publica; Universitat de Barcelona |
| <b>Primary Subject Heading</b>: | Epidemiology                                                                                                                                                                                                                                                                                                                                                                                                                                                                                                                                                                                                              |
| Secondary Subject Heading:      | Infectious diseases, Public health                                                                                                                                                                                                                                                                                                                                                                                                                                                                                                                                                                                        |
| Keywords:                       | Diagnostic microbiology < INFECTIOUS DISEASES, Epidemiology < INFECTIOUS DISEASES, Molecular diagnostics < INFECTIOUS DISEASES, Infection control < INFECTIOUS DISEASES                                                                                                                                                                                                                                                                                                                                                                                                                                                   |
|                                 |                                                                                                                                                                                                                                                                                                                                                                                                                                                                                                                                                                                                                           |

SCHOLARONE™  
Manuscripts

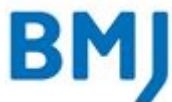

I, the Submitting Author has the right to grant and does grant on behalf of all authors of the Work (as defined in the below author licence), an exclusive licence and/or a non-exclusive licence for contributions from authors who are: i) UK Crown employees; ii) where BMJ has agreed a CC-BY licence shall apply, and/or iii) in accordance with the terms applicable for US Federal Government officers or employees acting as part of their official duties; on a worldwide, perpetual, irrevocable, royalty-free basis to BMJ Publishing Group Ltd ("BMJ") its licensees and where the relevant Journal is co-owned by BMJ to the co-owners of the Journal, to publish the Work in this journal and any other BMJ products and to exploit all rights, as set out in our [licence](#).

The Submitting Author accepts and understands that any supply made under these terms is made by BMJ to the Submitting Author unless you are acting as an employee on behalf of your employer or a postgraduate student of an affiliated institution which is paying any applicable article publishing charge ("APC") for Open Access articles. Where the Submitting Author wishes to make the Work available on an Open Access basis (and intends to pay the relevant APC), the terms of reuse of such Open Access shall be governed by a Creative Commons licence – details of these licences and which [Creative Commons](#) licence will apply to this Work are set out in our licence referred to above.

Other than as permitted in any relevant BMJ Author's Self Archiving Policies, I confirm this Work has not been accepted for publication elsewhere, is not being considered for publication elsewhere and does not duplicate material already published. I confirm all authors consent to publication of this Work and authorise the granting of this licence.

1  
2  
3 1 **Estimation of the incidence of invasive meningococcal disease using a capture-recapture**  
4 **model based on two independent surveillance systems, in Catalonia, Spain**  
5  
6  
7

8 3  
9  
10 4 Pilar Ciruela,<sup>1,2\*</sup> Marta Vilaró,<sup>2,3</sup> Gloria Carmona,<sup>1</sup> Mireia Jané,<sup>1,2,3</sup> Núria Soldevila,<sup>2,3</sup> Tomás  
11  
12 5 Garcia,<sup>1</sup> Sergi Hernández,<sup>1</sup> Laura Ruiz,<sup>1</sup> Angela Domínguez,<sup>2,3</sup> Working Group of the  
13  
14 6 Microbiological Reporting System of Catalonia and Working Group of the Epidemiological  
15  
16 7 Surveillance Network of Catalonia  
17  
18  
19 8

20  
21 9 <sup>1</sup> Public Health Agency of Catalonia (ASPCAT), Barcelona, Spain

22  
23 10 <sup>2</sup> CIBER Epidemiología y Salud Pública (CIBERESP), Madrid, Spain

24  
25 11 <sup>3</sup> Departament de Medicina, Universitat de Barcelona  
26  
27 12

28  
29 13

30  
31 14

32  
33 15

34  
35 16

36 16 **Corresponding author:**

37 17 Pilar Ciruela

38  
39 18 [pilar.ciruela@gencat.cat](mailto:pilar.ciruela@gencat.cat)

40  
41 19 Roc Boronat, 81-95

42  
43 20 08005 Barcelona, Spain

44  
45 21 Phone: +34935513680  
46  
47 22

48  
49 23

50  
51 24

52  
53 25

54  
55 26

56  
57 27

58  
59 27  
60

1  
2  
3 28 Pilar Ciruela<sup>1,2</sup>  
4  
5 29 <sup>1</sup> Agència de Salut Pública de Catalunya, Generalitat de Catalunya  
6  
7 30 C/ Roc Boronat, 81-95  
8  
9 31 08005 Barcelona, Spain  
10  
11 32 <sup>2</sup> CIBER de Epidemiología y Salud Pública (CIBERESP)  
12  
13 33 Instituto de Salud Carlos III  
14  
15 34 C/ Monforte de Lemos, 3-5  
16  
17 35 28029 Madrid, Spain  
18  
19 36 [pilar.ciruela@gencat.cat](mailto:pilar.ciruela@gencat.cat)  
20  
21  
22 37  
23  
24 38  
25  
26 39 Marta Vilaró<sup>2,3</sup>  
27  
28 40 <sup>2</sup>Departament de Medicina, Universitat de Barcelona  
29  
30 41 C/ Casanova, 143  
31  
32 42 08036 Barcelona, Spain  
33  
34 43 <sup>3</sup>CIBER de Epidemiología y Salud Pública (CIBERESP)  
35  
36 44 Instituto de Salud Carlos III  
37  
38 45 C/ Monforte de Lemos, 3-5  
39  
40 46 28029 Madrid, Spain  
41  
42 47 [marta.vilarpa@gmail.com](mailto:marta.vilarpa@gmail.com)  
43  
44  
45 48  
46  
47 49 Gloria Carmona  
48  
49 50 Agència de Salut Pública de Catalunya, Generalitat de Catalunya  
50  
51 51 C/ Roc Boronat, 81-95  
52  
53 52 08005 Barcelona, Spain  
54  
55 53 [gloria.carmona@gencat.cat](mailto:gloria.carmona@gencat.cat)  
56  
57  
58 54  
59  
60 55

1  
2  
3 56 Mireia Jané<sup>1,2</sup>  
4  
5 57 <sup>1</sup> Agència de Salut Pública de Catalunya, Generalitat de Catalunya  
6  
7 58 C/ Roc Boronat, 81-95  
8  
9 59 08005 Barcelona, Spain  
10  
11 60 <sup>2</sup> CIBER de Epidemiología y Salud Pública (CIBERESP)  
12  
13 61 Instituto de Salud Carlos III  
14  
15 62 C/ Monforte de Lemos, 3-5  
16  
17 63 28029 Madrid, Spain  
18  
19 64 [mireia.jane@gencat.cat](mailto:mireia.jane@gencat.cat)  
20  
21  
22 65  
23  
24 66 Núria Soldevila<sup>2,3</sup>  
25  
26 67 <sup>2</sup> Departament de Medicina, Universitat de Barcelona  
27  
28 68 C/ Casanova, 143  
29  
30 69 08036 Barcelona, Spain  
31  
32 70 <sup>3</sup> CIBER de Epidemiología y Salud Pública (CIBERESP)  
33  
34 71 Instituto de Salud Carlos III  
35  
36 72 C/ Monforte de Lemos, 3-5  
37  
38 73 28029 Madrid, Spain  
39  
40 74 [nsoldevila@ub.edu](mailto:nsoldevila@ub.edu)  
41  
42  
43 75  
44  
45 76 Tomás Garcia  
46  
47 77 Agència de Salut Pública de Catalunya, Generalitat de Catalunya  
48  
49 78 C/ Roc Boronat, 81-95  
50  
51 79 08005 Barcelona, Spain  
52  
53 80 [tgarala@alumnes.ub.edu](mailto:tgarala@alumnes.ub.edu)  
54  
55  
56 81  
57  
58 82 Sergi Hernández  
59  
60 83 Agència de Salut Pública de Catalunya, Generalitat de Catalunya

1  
2  
3 84 C/ Roc Boronat, 81-95  
4  
5 85 08005 Barcelona, Spain  
6  
7 86 [snmc@gencat.cat](mailto:snmc@gencat.cat)  
8  
9 87  
10  
11 88 Laura Ruiz  
12  
13 89 Agència de Salut Pública de Catalunya, Generalitat de Catalunya  
14  
15 90 C/ Roc Boronat, 81-95  
16  
17 91 08005 Barcelona, Spain  
18  
19 92 [laura.ruiz\\_ext@gencat.cat](mailto:laura.ruiz_ext@gencat.cat)  
20  
21  
22 93  
23  
24 94 Angela Domínguez<sup>2,3</sup>  
25  
26 95 <sup>2</sup> Departament de Medicina, Universitat de Barcelona  
27  
28 96 C/ Casanova, 143  
29  
30 97 08036 Barcelona, Spain  
31  
32 98 <sup>3</sup> CIBER de Epidemiología y Salud Pública (CIBERESP)  
33  
34 99 Instituto de Salud Carlos III  
35  
36 100 C/ Monforte de Lemos, 3-5  
37  
38 101 28029 Madrid, Spain  
39  
40 102 [angela.dominguez@ub.edu](mailto:angela.dominguez@ub.edu)  
41  
42  
43 103  
44  
45 104  
46  
47 105  
48  
49 106  
50  
51 107  
52  
53 108  
54  
55 109  
56  
57 110  
58  
59 111  
60



1  
2  
3 112 **ABSTRACT**  
4

5 113 **Objectives:** Invasive meningococcal disease (IMD) is an urgent notifiable disease and its early  
6  
7 114 notification is essential to prevent cases. The objective of the study was to assess the sensitivity  
8  
9 115 of two independent surveillance systems, and to estimate the incidence of IMD.  
10

11 116 **Design:** We used capture-recapture model based on two independent surveillance systems, the  
12  
13 117 statutory disease reporting system (SDR) and the microbiological reporting system (MRS) of the  
14  
15 118 Public Health Agency of Catalonia, between 2011 and 2015. The capture-recapture analysis and  
16  
17 119 95% confidence intervals were calculated using the Chapman formula. Multivariate vector  
18  
19 120 generalized linear model was performed for adjusted estimation.  
20  
21

22 121 **Measures:** The variables collected were age, sex, year of report, size of municipality (< 10,000  
23  
24 122 and  $\geq$  10,000), clinical form, death, serogroup, country of birth and type of reporting centre  
25  
26 123 (private and public).  
27

28 124 **Results:** The sensitivity of the two combined surveillance systems was 88.5% (85.0-92.0). SDR  
29  
30 125 had greater sensitivity than the MRS (67.9%; 62.7-73.1 vs. 64.7%; 59.4-70.0). In 2014-2015, the  
31  
32 126 sensitivity of both systems was higher (80.6%; 73.2-87.9 vs. 73.4%; 65.2-81.6) than in 2011-  
33  
34 127 2013 (59.3%; 52.6-66.0 vs. 58.3%; 51.6-65.1). In private centres, the sensitivity was higher for  
35  
36 128 SDR than for MRS (100%; 100-100 vs. 4.8%; -4.4-13.9). The adjusted estimate of IMD cases  
37  
38 129 was lower than that obtained using the Chapman formula (279; 266-296 vs. 313; 295-330). The  
39  
40 130 estimated adjusted incidence of IMD was 0.7/100,000 persons-year.  
41  
42

43 131 **Conclusions:** The sensitivity of enhanced surveillance through the combination of two  
44  
45 132 complementary sources was higher than for the sources individually. Factors associated with  
46  
47 133 under-reporting in different systems should be analysed to improve IMD surveillance.  
48

49 134

50  
51 135 **Keywords:**

52  
53 136 Meningococcal disease, Capture-recapture, estimated incidence, surveillance systems.  
54  
55

56 137

57  
58 138 **Strengths and limitations of this study**  
59

60 139

- 1  
2  
3 140 • Early notification of Invasive meningococcal disease is essential to prevent cases.  
4  
5 141 • This study was strengthened by a wide coverage by means of two epidemiological surveillance  
6  
7 142 sources: The Statutory Disease Reporting System (SDR), based on passive reporting of health  
8  
9 143 professionals, and the Microbiological Reporting System (MRS), based on confirmed-  
10  
11 144 laboratory cases.  
12  
13 145 • SDR had greater sensitivity than MRS (67.9%; 62.7-73.1 vs. 64.7%; 59.4-70.0) but the  
14  
15 146 sensitivity of both surveillance sources together was higher than each source individually.  
16  
17 147 • Factors associated with under-reporting should be analysed for invasive meningococcal  
18  
19 148 disease (IMD) surveillance.  
20  
21  
22 149  
23  
24 150

## 26 151 **BACKGROUND**

28 152 Invasive meningococcal disease (IMD) continues to be an important cause of morbidity and  
29  
30 153 mortality, mainly in children aged < 4 years and adolescents. [1]  
31  
32 154 In the European regions, the incidence rate of confirmed IMD cases was 0.62/100,000 persons-  
33  
34 155 year in 2018 [2], and in Spain it was 0.86/100,000 persons. [3] Six serogroups (A, B, C, W, X,  
35  
36 156 Y) currently cause almost all cases of this life-threatening disease worldwide. Case fatality rate is  
37  
38 157 about 10% in developed countries [4-6], and 40-65% present with meningitis, but  
39  
40 158 meningococemia and pneumonia are also frequent [4], being the serogroup involved related both  
41  
42 159 with the case fatality rate [7] and the predominant clinical form. [8] Serogroup B causes more  
43  
44 160 than a third part of IMD [4,9] but in some countries or population groups the proportion is even  
45  
46 161 higher. [10,11] In Spain, from 2009 to 2018, serogroup B accounted for 64% of IMD cases. [12]  
47  
48 162 A high proportion, up to 60% [13] of IMD cases, are affected by a range of sequelae and health  
49  
50 163 related impairment in the quality of life of survivors and their families. [14]  
51  
52 164 IMD is an urgent notifiable disease and its early notification is essential to provide an adequate  
53  
54 165 public health response in patients and their close contacts to prevent further cases.  
55  
56 166 Epidemiological surveillance allows monitoring of the impact of public health interventions,  
57  
58 167 including vaccination programmes. Therefore, a robust epidemiological and microbiological  
59  
60

1  
2  
3 168 system with timely and accurate surveillance providing information on the frequency of cases and  
4  
5 169 the distribution of circulating serogroups is crucial.  
6

7 170

8  
9 171 Evaluations of surveillance systems should be conducted regularly to increase their utility. [15-  
10  
11 172 17] There are two reporting systems for the epidemiological surveillance of communicable  
12  
13 173 disease in Catalonia: the statutory disease reporting system (SDR) and the microbiological  
14  
15 174 reporting system (MRS). [18]  
16

17 175

18  
19  
20 176 The capture-recapture method is a statistical method for estimating the real incidence of diseases  
21  
22 177 in a population with two or more information sources. [19, 20] The method is valid if four  
23  
24 178 conditions are met: 1) the population under study has to be closed, i.e., there should be no changes  
25  
26 179 during the study period; 2) there must be a method of determining whether an individual identified  
27  
28 180 by one source is the same as an individual identified by the other; 3) each individual must have  
29  
30 181 the same probability of being captured by either system; 4) the systems must be independent.  
31

32 182

33  
34 183 The aim of this study was to assess the sensitivity of the two surveillance systems in Catalonia  
35  
36 184 (SDR and MRS) using the capture-recapture method and to estimate the incidence of IMD.  
37

38 185

## 39 186 **METHODS**

### 40 187 **Information sources**

41 188 Catalonia is a region in the northeast of Spain with a population of 7,508,106 in 2015. [21]

42  
43 189 The SDR is a passive surveillance system through which health professionals report all infectious  
44  
45 190 diseases subject to surveillance. The reporting of cases to the Public Health Agency of Catalonia  
46  
47 191 (PHAC) is mandatory and includes confirmed cases of IMD and is regulated by a Decree. [18,  
48  
49 192 22]  
50

51 193

52  
53 194 The MRS is a surveillance system that consists of microbiologists notifying laboratory confirmed  
54  
55 195 microorganisms that cause infectious diseases. The main objectives of the MRS are to confirm  
56  
57

1  
2  
3 196 suspected cases of infectious diseases through the identification of the microorganisms and  
4  
5 197 serogroups involved and to determine trends and changes in epidemiological patterns and  
6  
7 198 microbiological resistance. [23]

9 199 The MRS was non-compulsory until 2015 and involved 50 health care centres representing over  
10  
11 200 83% of acute hospital beds. [24] Confirmed IMD cases were reported by microbiologists  
12  
13 201 including sex, age, clinical presentation (meningitis, bacteraemia of unknown focus and other  
14  
15 202 clinical presentations), serogroup and diagnostic method.

16  
17  
18 203

19  
20 204 Both systems belong to the PHAC epidemiological surveillance network and, since 2014, transfer  
21  
22 205 information automatically, but the independence of the sources is maintained.

23  
24 206

25  
26 207 **Cases definition, inclusion, and exclusion criteria**

27  
28 208 A confirmed case of IMD was defined as laboratory confirmed if at least one of the following  
29  
30 209 criteria was fulfilled: isolation in cultures or detection of *Neisseria meningitidis* DNA by PCR in  
31  
32 210 a normally sterile site, detection of gram-negative diplococci or *N. meningitidis* antigen in  
33  
34 211 cerebrospinal fluid.

35  
36  
37 212

38  
39 213 **Data collection**

40  
41 214 We made a retrospective study of confirmed IMD cases in Catalonia from January 2011 to  
42  
43 215 December 2015. We extracted all IMD records from the MRS and SDR and linked the databases  
44  
45 216 using the personal identification code (PIC). When the PIC was not available, data on notification,  
46  
47 217 age and sex were used to identify duplicates between the two sources. In cases with inconclusive  
48  
49 218 matching, the hospital was used as a fifth matching criterion.

50  
51 219

52  
53 220 Estimates were made for the entire 5-year period and by age, sex, year of report, size of  
54  
55 221 municipality (<10,000 and  $\geq$ 10,000), country of birth, number of hospital beds, clinical form  
56  
57 222 (meningitis, with or without sepsis, sepsis, and others), serogroup, death and reporting centre  
58  
59 223 (private or public).

1  
2  
3 224 **Ethics statement**  
4

5 225 The study was not submitted for research ethics approval as the activities described were  
6  
7 226 conducted as part of the legislated mandate of the Health Department of Catalonia, the competent  
8  
9 227 authority for surveillance of communicable diseases according to Decree 203/2015 of the 15  
10  
11 228 September which created the epidemiological surveillance network of Catalonia. [18] All the  
12  
13 229 study activities formed part of public health surveillance and did not require informed consent.  
14  
15 230 Personal data were used only for the matching process and measures to protect the confidentiality  
16  
17 231 of personal data were applied (access to the data restricted to the personnel involved in data  
18  
19 232 analysis, and removal of personal data from the datasets after matching).  
20  
21

22 233

23  
24 234 **Patient and public involvement**  
25

26 235 No patient involved  
27  
28 236

29  
30 237 **Statistical methods**  
31

32 238 The total number of IMD cases was estimated using the two-source capture-recapture method,  
33  
34 239 which uses Chapman's formula, [25] developed to reduce bias due to small samples:

35  
36  
37 240 
$$N = \frac{(L1 + 1)(L2 + 1)}{a + 1} - 1$$
  
38  
39  
40 241 
$$95\%CI = N \pm 1.96 \sqrt{\frac{(L1 + 1)(L2 + 1)(L1 - a)(L2 - a)}{(a + 1)^2(a + 2)}}$$
  
41  
42  
43  
44 242

45  
46 243 where L1 is the number of cases in the SDR dataset, L2 is the number of cases reported to MRS,  
47  
48 244 and **a** is the number of cases captured by both systems. The sensitivity (Se) of case ascertainment  
49  
50 245 by the two sources was also calculated as the proportion of true cases detected by each source,  
51  
52 246 i.e. Se (1) =L1/N for source 1 and Se (2) =L2/N for source 2. The sensitivity of both sources  
53  
54 247 combined was calculated as the proportion of cases detected by one of the two sources or both,  
55  
56 248 i.e., Se (1, 2) =(L1+L2-a)/N.  
57

58 249  
59  
60

1  
2  
3 250 The independence of the sources was considered when applying the capture-recapture method.  
4  
5 251 [26, 27] In the two-by-two table, where **a** represents cases reported by two sources or  
6  
7 252 combinations of sources, **b** and **c** cases reported exclusively by either of the two sources and **x** the  
8  
9 253 estimated non-reported cases by either of the sources, the odds ratio ( $OR = ax/bc$ ) should not  
10  
11 254 differ from one.

12  
13  
14 255

15  
16 256 As a multivariate model, a vector generalized linear model (VGLM) from the generalized additive  
17  
18 257 model (GAM) framework [28] was used to evaluate patient characteristics and the probability of  
19  
20 258 capture by the different sources taking into account the covariates: age (<15 vs >=15), gender,  
21  
22 259 year of notification (2011-2013 vs 2014-2015), size of the municipality (<10,000 vs >=10,000),  
23  
24 260 country of birth (Spain vs other), number of hospital beds (<200 vs >=200) and diagnosis  
25  
26 261 (meningitis vs septicaemia). The outcome for the model is a two column matrix with 0 and 1  
27  
28 262 indicating if the record is identified by SDR or MRS. We used a backwards stepwise procedure  
29  
30 263 (using likelihood ratio tests, with a p-value >0.2 as the criterion for removing variables from the  
31  
32 264 model) [29, 30] to eliminate covariates, starting with a full model including all described  
33  
34 265 covariates, and we used the parameter estimates from the model to estimate the sizes of population  
35  
36 266 subgroups and calculate incidence rates. The 95% confidence intervals (CI) were calculated,  
37  
38 267 allowing for uncertainty in the total number of cases estimated. For each of the described  
39  
40 268 covariates, VLGM with source notification as outcome was used to test differences in  
41  
42 269 sensitivities. All analyses were made using R software version 3.0.1.

43  
44  
45 270

46  
47 271

## 48 49 272 **RESULTS**

### 50 51 273 **Patient characteristics**

52  
53 274 Patient characteristics by source are shown in Table 1. From 2011 to 2015, 212 IMD cases were  
54  
55 275 reported to the SDR and 202 cases to the MRS, representing an incidence of 0.56 and 0.54  
56  
57 276 /100,000 persons-year, respectively. IMD due to serogroup B was the most-frequently reported  
58  
59 277 serogroup (77.4% and 75.7% in the SDR and MRS, respectively). Around 63% of patients were

aged < 15 years; the mean age was 21.4 for the SDR and 20.5 years for the MRS. Male sex was more frequent in the SDR (52.4%) than in the MRS (49%). The SDR presented the most cases in 2015 (48 cases; 22.6%) and the MRS (61 cases; 30.2%) in 2011. The SDR reported that 84% of patients lived in a municipality of  $\geq 10,000$  people compared with 73% in the MRS. In both sources, the number of cases declared in a hospital of  $\geq 200$  beds were around 70%. The main clinical form in both sources was meningitis (54.7% and 64.8%, respectively) and sepsis (38.7% and 32.7%, respectively). Reports from private centres represented 10% of cases in the SDR and 0.5% in the MRS. Twenty-two cases (10.4%) cases reported by the SDR died compared with 11 cases (5.4%) reported by the MRS.

**Table 1. Sociodemographic, clinical and microbiological characteristics of invasive meningococcal disease cases reported to the SDR and MRS, Catalonia 2011-2015**

|                                       | SDR (n=212) | MRS (n=202) |
|---------------------------------------|-------------|-------------|
| <b>Age groups</b>                     |             |             |
| Mean (SD)                             | 21.4 (27.9) | 20.5 (26.7) |
| Median (IQR)                          | 6 (36)      | 6 (32.3)    |
| <2 years, n (%)                       | 62 (29.8%)  | 61 (30.7%)  |
| 2 - 4 years, n (%)                    | 35 (16.8%)  | 30 (15.1%)  |
| 5 - 14 years, n (%)                   | 34 (16.3%)  | 35 (17.6%)  |
| 15 - 24 years, n (%)                  | 12 (5.8%)   | 12 (6.0%)   |
| 25 - 34 years, n (%)                  | 12 (5.8%)   | 9 (4.5%)    |
| 35 - 44 years, n (%)                  | 10 (4.8%)   | 12 (6.0%)   |
| 45 - 54 years, n (%)                  | 9 (4.3%)    | 7 (3.5%)    |
| >55 years, n (%)                      | 34 (16.3%)  | 33 (16.6%)  |
| NAs                                   | 1 (0.5%)    | 2 (1.0%)    |
| <b>Sex, n (%)</b>                     |             |             |
| Male                                  | 111 (52.4%) | 99 (49.0%)  |
| Female                                | 101 (47.6%) | 103 (51.0%) |
| <b>Year of report, n (%)</b>          |             |             |
| 2011                                  | 43 (20.3%)  | 61 (30.2%)  |
| 2012                                  | 41 (19.3%)  | 29 (14.4%)  |
| 2013                                  | 38 (17.9%)  | 30 (14.9%)  |
| 2014                                  | 42 (19.8%)  | 34 (16.8%)  |
| 2015                                  | 48 (22.6%)  | 48 (23.8%)  |
| <b>Size of municipality, n (%)</b>    |             |             |
| <10,000 people                        | 27 (12.7%)  | 28 (13.9%)  |
| $\geq 10,000$ people                  | 177 (83.5%) | 148 (73.3%) |
| NAs                                   | 8 (3.8%)    | 26 (12.9%)  |
| <b>Country of birth, n (%)</b>        |             |             |
| Spain                                 | 194 (91.5%) | 188 (93.1%) |
| Other countries                       | 18 (8.5%)   | 14 (6.9%)   |
| <b>Number of hospital beds, n (%)</b> |             |             |
| <200                                  | 60 (28.3%)  | 65 (32.2%)  |
| $\geq 200$                            | 149 (70.3%) | 137 (67.8%) |

|                                 |             |             |
|---------------------------------|-------------|-------------|
| NAs                             | 3 (1.4%)    | 0 (0.0%)    |
| <b>Clinical form, n (%)</b>     |             |             |
| Meningitis                      | 116 (54.7%) | 131 (64.8%) |
| Septicaemia                     | 82 (38.7%)  | 66 (32.7%)  |
| Other forms                     | 14 (6.6%)   | 4 (2.0%)    |
| NAs                             | 0 (0.0%)    | 1 (0.5%)    |
| <b>Serogroup, n (%)</b>         |             |             |
| A                               | 0 (0.0%)    | 2 (1.0%)    |
| B                               | 164 (77.4%) | 153 (75.7%) |
| C                               | 26 (12.3%)  | 21 (10.4%)  |
| W135                            | 4 (1.9%)    | 6 (3.0%)    |
| Y                               | 5 (2.4%)    | 2 (1.0%)    |
| Y/ W135                         | 1 (0.5%)    | 1 (0.5%)    |
| Non-groupable                   | 6 (2.8%)    | 4 (2.0%)    |
| NAs                             | 6 (2.8%)    | 13 (6.4%)   |
| <b>Type of reporting centre</b> |             |             |
| Private                         | 21 (10.0%)  | 1 (0.5%)    |
| Public                          | 190 (90.0%) | 201 (99.5%) |

NAs: Not available; SDR: Statutory disease reporting; MDR: Microbiological reporting system

### **Capture-recapture analysis**

The odds ratio (OR) was 1.01 (95%CI 0.62-1.66), reinforcing the independence of the two sources.

During the period studied, 212 and 202 IMD cases were reported by the SDR and MRS, respectively. One hundred thirty-seven cases (43.8%) coincided in both sources and 36 cases (11.5%) were not reported to either source. The estimated number of cases was 313 (95% CI 295–330) (Figure 1) and the estimated incidence rate was 0.83/100,000 persons-year.

The sensitivity of the SDR was 67.9% (95%CI 62.7-73.1) and that of the MRS was 64.7% (95%CI 59.4-70.0) (P<0.001) (Table 2). The sensitivity increased to 88.5% (95%CI 85.0-92.0) when the datasets were combined.



308 **Table 2. Capture–recapture analysis of all invasive meningococcal disease cases reported to the SDR and MRS stratified by characteristics, Catalonia**  
 309 **2011-2015**

|                                 | No. records in SDR | No. records in MRS | Matched records | Calculated unreported cases | Estimated total no. of cases (95% CI) | Sensitivity SDR (%) (95% CI) | Sensitivity MRS (%) (95% CI) | Difference in sensitivities (%) | P-value          |
|---------------------------------|--------------------|--------------------|-----------------|-----------------------------|---------------------------------------|------------------------------|------------------------------|---------------------------------|------------------|
| <b>All cases</b>                | 212                | 202                | 137             | 36                          | 313 (295, 330)                        | 67.9 (62.7, 73.1)            | 64.7 (59.4, 70.0)            | 3.2                             | <b>&lt;0.001</b> |
| <b>Age group</b>                |                    |                    |                 |                             |                                       |                              |                              |                                 |                  |
| <15 years                       | 131                | 126                | 87              | 20                          | 190 (177, 203)                        | 69.1 (62.6, 75.7)            | 66.5 (59.8, 73.2)            | 2.6                             | 0.468            |
| ≥15 years                       | 80                 | 74                 | 49              | 16                          | 121 (109, 133)                        | 66.4 (58.0, 74.8)            | 61.4 (52.7, 70.1)            | 5.0                             |                  |
| <b>Sex</b>                      |                    |                    |                 |                             |                                       |                              |                              |                                 |                  |
| Male                            | 111                | 99                 | 71              | 16                          | 155 (144, 166)                        | 71.8 (64.7, 78.9)            | 64.0 (56.5, 71.6)            | 7.8                             | 0.588            |
| Female                          | 101                | 103                | 66              | 20                          | 158 (145, 171)                        | 64.2 (56.7, 71.7)            | 65.5 (58.1, 72.9)            | -1.3                            |                  |
| <b>Year of report</b>           |                    |                    |                 |                             |                                       |                              |                              |                                 |                  |
| 2011-2013                       | 122                | 120                | 71              | 35                          | 206 (187, 226)                        | 59.3 (52.6, 66.0)            | 58.3 (51.6, 65.1)            | 1.0                             | <b>&lt;0.001</b> |
| 2014-2015                       | 90                 | 82                 | 66              | 6                           | 112 (106, 118)                        | 80.6 (73.2, 87.9)            | 73.4 (65.2, 81.6)            | 7.2                             |                  |
| <b>Size of municipality</b>     |                    |                    |                 |                             |                                       |                              |                              |                                 |                  |
| <10,000 people                  | 27                 | 28                 | 22              | 2                           | 35 (32, 37)                           | 78.7 (65.0, 92.4)            | 81.6 (68.7, 94.6)            | -2.9                            | 0.100            |
| ≥10,000 people                  | 177                | 148                | 110             | 23                          | 238 (225, 252)                        | 74.4 (68.9, 80.0)            | 62.2 (56.1, 68.4)            | 12.2                            |                  |
| <b>Country of birth</b>         |                    |                    |                 |                             |                                       |                              |                              |                                 |                  |
| Spain                           | 194                | 188                | 127             | 32                          | 287 (271, 304)                        | 67.6 (62.2, 73.0)            | 65.5 (60.0, 71.0)            | 2.1                             | 0.696            |
| Other countries                 | 18                 | 14                 | 10              | 3                           | 25 (20, 30)                           | 72.3 (54.7, 89.9)            | 56.2 (36.7, 75.7)            | 16.1                            |                  |
| <b>Number of hospital beds</b>  |                    |                    |                 |                             |                                       |                              |                              |                                 |                  |
| <200                            | 60                 | 65                 | 40              | 13                          | 97 (87, 108)                          | 61.7 (52.1, 71.4)            | 66.9 (57.5, 76.2)            | -5.1                            | 0.514            |
| ≥200                            | 149                | 137                | 97              | 22                          | 210 (197, 224)                        | 70.9 (64.7, 77.0)            | 65.2 (58.7, 71.6)            | 5.7                             |                  |
| <b>Clinical form</b>            |                    |                    |                 |                             |                                       |                              |                              |                                 |                  |
| Meningitis                      | 116                | 131                | 84              | 18                          | 181 (169, 193)                        | 64.2 (57.2, 71.2)            | 72.5 (66.0, 79.0)            | -8.3                            | 0.936            |
| Sepsis                          | 82                 | 66                 | 50              | 10                          | 108 (99, 117)                         | 75.9 (67.9, 84.0)            | 61.1 (51.9, 70.3)            | 14.8                            |                  |
| <b>Type of reporting centre</b> |                    |                    |                 |                             |                                       |                              |                              |                                 |                  |
| Private                         | 21                 | 1                  | 1               | 0                           | 21 (21, 21)                           | 100 (100, 100)               | 4.8 (-4.4, 13.9)             | 95.2                            | <b>0.002</b>     |
| Public                          | 190                | 201                | 136             | 26                          | 281 (267, 295)                        | 67.7 (62.2, 73.2)            | 71.6 (66.4, 76.9)            | -3.9                            |                  |
| <b>Serogrup</b>                 |                    |                    |                 |                             |                                       |                              |                              |                                 |                  |
| B                               | 164                | 153                | 114             | 17                          | 220 (209, 231)                        | 74.6 (68.8, 80.3)            | 69.6 (63.5, 75.6)            | 5.0                             | 0.636            |

1  
2  
3  
4  
5  
6  
7  
8  
9  
10  
11  
12  
13  
14  
15  
16  
17  
18  
19  
20  
21  
22  
23  
24  
25  
26  
27  
28  
29  
30  
31  
32  
33  
34  
35  
36  
37  
38  
39  
40  
41  
42  
43  
44  
45  
46

|          |    |    |    |   |             |                   |                   |      |  |
|----------|----|----|----|---|-------------|-------------------|-------------------|------|--|
| <b>C</b> | 26 | 21 | 16 | 3 | 34 (29, 39) | 76.7 (62.5, 90.9) | 61.9 (45.6, 78.3) | 14.8 |  |
|----------|----|----|----|---|-------------|-------------------|-------------------|------|--|

310 SDR: Statutory disease reporting; MDR: Microbiological reporting system

For peer review only

1  
2  
3 311 There were no differences in sensitivity between in <15 years and  $\geq$ 15 years age group (P-  
4 312 value=0.468) in either source although it was higher in the <15 years (69.1%;  
5 313 95%CI 62.6-75.7 in the SDR and 66.5%; 95%CI 59.8-73.2 in the MRS). The age groups with the  
6  
7 314 highest sensitivity were 2-4 years in the SDR, with 80.3% (95%CI 68.5-92.1), and 35-44 years in  
8  
9 315 the MRS, with 80.5% (95%CI 60.4-100.0) (Figure 2).

10  
11  
12  
13 316 In 2011-2013, sensitivity for the SDR and the MRS were 59.3% (95%CI 52.6-66) and 58.3%  
14 317 (95%CI 51.6-65.1), respectively, lower than that in 2014-2015 (80.6%; 95%CI 73.2-87.9, for the  
15  
16 318 SDR and 73.4%; 95%CI 65.2-81.6, for the MRS (P<0.001)) (Table 2). 2014 showed the highest  
17  
18 319 sensitivity for both sources: 91.3% (95%CI 83.2-99.4) for the SDR and 73.9% (95%CI 61.2-86.6)  
19  
20 320 for the MRS (Figure 3). 2011 was the only year in which the MRS had a higher sensitivity than  
21  
22 321 the SDR (56.4%; 95%CI 47.1-65.8 and 39.8%; 95%CI 30.6-49.0, respectively). In private centres  
23  
24 322 the sensitivity of the SDR was 100% (95%CI 100-100) and that of the MRS was 4.8% (95%CI -  
25  
26 323 4.4-13.9). No differences were found in other characteristics analysed.

27  
28  
29  
30 324

31  
32 325 For meningitis, 116 and 131 cases were reported by the SDR and the MRS, respectively. The  
33  
34 326 estimated number of meningitis cases was 181, and 18 cases were not reported by either source.  
35  
36 327 The highest sensitivity was detected in the MRS (72.5%; 95% CI 66-79) compared with the SDR  
37  
38 328 (64.2%; 95%CI 57.2-71.2) (P<0.001) (Table 3). 2014-2015 showed a higher sensitivity in both  
39  
40 329 sources compared with 2011-2013: 82.4% (95%CI 72.7-92) in the MRS and 75.6% (95%CI 64.7-  
41  
42 330 86.5) in the SDR. Public centres had a higher sensitivity in the MRS (77.7%; 95%CI 71.4-84.0)  
43  
44 331 and in the SDR (63.9%; 95%CI 56.6-71.2) (P<0.037).

45  
46  
47 332  
48  
49  
50  
51  
52  
53  
54  
55  
56  
57  
58  
59  
60

333 **Table 3. Capture–recapture analysis of meningococcal meningitis reported to the SDR and MRS stratified by characteristics, Catalonia 2011–2015**  
 334

|                                 | No. records in SDR | No. records in MRS | Matched records | Calculated unreported cases | Estimated total no. of cases (95% CI) | Sensitivity SDR (%) (95% CI) | Sensitivity MRS (%) (95% CI) | Difference in sensitivities (%) | P-value          |
|---------------------------------|--------------------|--------------------|-----------------|-----------------------------|---------------------------------------|------------------------------|------------------------------|---------------------------------|------------------|
| <b>All cases</b>                | 116                | 131                | 84              | 18                          | 181 (169, 193)                        | 64.2 (57.2, 71.2)            | 72.5 (66.0, 79.0)            | -8.3                            | <b>&lt;0.001</b> |
| <b>Age group</b>                |                    |                    |                 |                             |                                       |                              |                              |                                 |                  |
| <15 years                       | 72                 | 81                 | 51              | 13                          | 115 (104, 125)                        | 63.1 (54.3, 72.0)            | 71.0 (62.7, 79.3)            | -7.9                            | 0.682            |
| ≥15 years                       | 43                 | 49                 | 32              | 6                           | 66 (60, 73)                           | 65.5 (53.9, 77.0)            | 74.6 (64.1, 85.1)            | -9.1                            |                  |
| <b>Sex</b>                      |                    |                    |                 |                             |                                       |                              |                              |                                 |                  |
| Male                            | 62                 | 69                 | 47              | 7                           | 91 (84, 98)                           | 68.2 (58.6, 77.8)            | 75.9 (67.1, 84.7)            | -7.7                            | 0.245            |
| Female                          | 54                 | 62                 | 37              | 12                          | 91 (81, 101)                          | 59.9 (49.8, 70.0)            | 68.7 (59.2, 78.3)            | -8.9                            |                  |
| <b>Year of report</b>           |                    |                    |                 |                             |                                       |                              |                              |                                 |                  |
| 2011–2013                       | 71                 | 82                 | 47              | 18                          | 124 (111, 137)                        | 57.5 (48.8, 66.2)            | 66.4 (58.1, 74.7)            | -8.9                            | <b>0.013</b>     |
| 2014–2015                       | 45                 | 49                 | 37              | 3                           | 60 (56, 64)                           | 75.6 (64.7, 86.5)            | 82.4 (72.7, 92.0)            | -6.7                            |                  |
| <b>Size of municipality</b>     |                    |                    |                 |                             |                                       |                              |                              |                                 |                  |
| <10,000 people                  | 19                 | 20                 | 16              | 1                           | 24 (22, 26)                           | 80.2 (64.1, 96.2)            | 84.4 (69.8, 99.0)            | -4.2                            | 0.165            |
| ≥10,000 people                  | 93                 | 93                 | 65              | 12                          | 133 (124, 143)                        | 70.0 (62.2, 77.8)            | 70.0 (62.2, 77.8)            | 0.0                             |                  |
| <b>Country of birth</b>         |                    |                    |                 |                             |                                       |                              |                              |                                 |                  |
| Spain                           | 107                | 120                | 77              | 17                          | 167 (155, 179)                        | 64.3 (57.0, 71.5)            | 72.1 (65.3, 78.9)            | -7.8                            | 0.862            |
| Other countries                 | 9                  | 11                 | 7               | 1                           | 14 (12, 17)                           | 64.3 (39.2, 89.4)            | 78.6 (57.1, 100.0)           | -14.3                           |                  |
| <b>Number of hospital beds</b>  |                    |                    |                 |                             |                                       |                              |                              |                                 |                  |
| <200                            | 31                 | 40                 | 23              | 6                           | 54 (47, 61)                           | 57.7 (44.5, 70.9)            | 74.5 (62.8, 86.2)            | -16.8                           | 0.516            |
| ≥200                            | 84                 | 91                 | 61              | 11                          | 126 (116, 135)                        | 67.1 (58.9, 75.4)            | 72.7 (64.9, 80.5)            | -5.6                            |                  |
| <b>Type of reporting centre</b> |                    |                    |                 |                             |                                       |                              |                              |                                 |                  |
| Private                         | 9                  | 1                  | 1               | 0                           | 9 (9, 9)                              | 100.0 (100.0, 100.0)         | 11.1 (-9.4, 31.6)            | 88.9                            | <b>0.037</b>     |
| Public                          | 107                | 130                | 83              | 14                          | 168 (158, 178)                        | 63.9 (56.6, 71.2)            | 77.7 (71.4, 84.0)            | -13.7                           |                  |
| <b>Serogrup</b>                 |                    |                    |                 |                             |                                       |                              |                              |                                 |                  |
| B                               | 91                 | 100                | 70              | 9                           | 130 (122, 138)                        | 70.1 (62.2, 77.9)            | 77.0 (69.7, 84.2)            | -6.9                            | 0.641            |
| C                               | 16                 | 16                 | 11              | 2                           | 23 (19, 27)                           | 69.3 (50.4, 88.1)            | 69.3 (50.4, 88.1)            | 0                               |                  |

335 SDR: Statutory disease reporting; MDR: Microbiological reporting system

1  
2  
3 336 For septicaemia, 82 cases and 66 cases were reported by the SDR and the MRS, respectively. The  
4  
5 337 sensitivity was higher for the SDR (75.9%; 95%CI 67.9-84) than the MRS (61.1%; 95%CI 51.9-  
6  
7 338 70.3) (Table 4). There were 108 estimated cases and 10 cases were not reported by either source.  
8  
9 339 The sensitivity was higher in the <15 years than in the ≥15 years in both sources, but higher in  
10  
11 340 the SDR (81.1%; 95%CI 71.1-91.1 versus 71%; 95%CI 59.4-82.5 for the MRS; P=0.036), and  
12  
13 341 higher in 2014-2015 than in 2011-2013 (87.6%; 95%CI 78-97.3 for the SDR and 71.9%; 95%CI  
14  
15 342 58.7-85.1 for the MRS) (P<0.015).

16  
17 343  
18  
19 344 Serogroup B (Supplementary Table 1) showed the sensitivity of the SDR was higher than that of  
20  
21 345 the MRS (74.6%; 95%CI 68.8-80.3 and 69.6%; 95%CI 63.5-75.6, respectively). There were  
22  
23 346 differences according to the period and the type of centre. In 2014-2015, the sensitivity was 87.1%  
24  
25 347 (95%CI 79.7-94.5) for the SDR and 78.3% (95%CI 69.2-87.4) for the MRS (P<0.002). In private  
26  
27 348 centres, the sensitivity in SDR was 100% compared with 7.1% (95%CI -6.4-20.6) (P=0.004) in  
28  
29 349 MRS. The sensitivity was higher for IMD serogroup C cases in SDR than in MRS (76.7%; 95%CI  
30  
31 350 62.5-90.9 and 62%; 95%CI 45.6-78.3, respectively) (Supplementary Table 2).

32  
33 351  
34  
35 352 All 22 deaths were reported in the SDR (CFR: 10.4%), and the sensitivity of the SDR was higher  
36  
37 353 than that of the MRS (100%; 95%CI 100-100 vs 50%; 95%CI 29.1-70.9, P=0.104). No  
38  
39 354 differences were found in other characteristics analysed (Supplementary Table 3).  
40  
41  
42  
43  
44  
45  
46  
47  
48  
49  
50  
51  
52  
53  
54  
55  
56  
57  
58  
59  
60

355 **Table 4. Capture–recapture analysis of meningococcal septicaemia reported to the SDR and MRS stratified by characteristics, Catalonia 2011-2015**  
 356

|                                   | No. records in SDR | No. records in MRS | Matched records | Calculated unreported cases | Estimated total no. of cases (95% CI) | Sensitivity SDR (%) (95% CI) | Sensitivity MRS (%) (95% CI) | Difference in sensitivities (%) | P-value          |
|-----------------------------------|--------------------|--------------------|-----------------|-----------------------------|---------------------------------------|------------------------------|------------------------------|---------------------------------|------------------|
| <b>All cases</b>                  | 82                 | 66                 | 50              | 10                          | 108 (99, 117)                         | 75.9 (67.9, 84.0)            | 61.1 (51.9, 70.3)            | 14.8                            | <b>&lt;0.001</b> |
| <b>Age at notification, years</b> |                    |                    |                 |                             |                                       |                              |                              |                                 |                  |
| <15 years                         | 48                 | 42                 | 34              | 4                           | 60 (55, 64)                           | 81.1 (71.1, 91.1)            | 71.0 (59.4, 82.5)            | 10.1                            | <b>0.036</b>     |
| ≥15 years                         | 34                 | 23                 | 16              | 8                           | 49 (40, 58)                           | 70.3 (57.4, 83.1)            | 47.5 (33.4, 61.6)            | 22.7                            |                  |
| <b>Sex</b>                        |                    |                    |                 |                             |                                       |                              |                              |                                 |                  |
| Male                              | 43                 | 27                 | 22              | 5                           | 53 (47, 59)                           | 81.8 (71.3, 92.2)            | 51.3 (37.8, 64.8)            | 30.4                            | <b>0.315</b>     |
| Female                            | 39                 | 39                 | 28              | 5                           | 55 (49, 60)                           | 72.0 (60.0, 83.9)            | 72.0 (60.0, 83.9)            | 0.0                             |                  |
| <b>Year of report</b>             |                    |                    |                 |                             |                                       |                              |                              |                                 |                  |
| 2011-2013                         | 43                 | 34                 | 22              | 11                          | 66 (56, 77)                           | 65.2 (53.6, 76.7)            | 51.5 (39.5, 63.6)            | 13.6                            | <b>0.015</b>     |
| 2014-2015                         | 39                 | 32                 | 28              | 2                           | 45 (42, 48)                           | 87.6 (78.0, 97.3)            | 71.9 (58.7, 85.1)            | 15.7                            |                  |
| <b>Size of municipality</b>       |                    |                    |                 |                             |                                       |                              |                              |                                 |                  |
| <10,000 people                    | 7                  | 7                  | 5               | 1                           | 10 (8, 12)                            | 72.2 (44.0, 100.0)           | 72.2 (44.0, 100.0)           | 0.0                             | <b>0.918</b>     |
| ≥10,000 people                    | 71                 | 52                 | 43              | 6                           | 86 (80, 93)                           | 82.9 (74.9, 90.8)            | 60.7 (50.3, 71.0)            | 22.2                            |                  |
| <b>Country of birth</b>           |                    |                    |                 |                             |                                       |                              |                              |                                 |                  |
| Spain                             | 73                 | 63                 | 47              | 9                           | 98 (90, 106)                          | 74.7 (66.1, 83.3)            | 64.5 (55.0, 74.0)            | 10.2                            | <b>0.275</b>     |
| Other countries                   | 9                  | 3                  | 3               | 0                           | 9 (9, 9)                              | 100.0 (100.0, 100.0)         | 33.3 (2.5, 64.1)             | 66.7                            |                  |
| <b>Number of hospital beds</b>    |                    |                    |                 |                             |                                       |                              |                              |                                 |                  |
| <200                              | 25                 | 23                 | 16              | 4                           | 36 (31, 42)                           | 70.0 (55.0, 85.1)            | 64.4 (48.7, 80.1)            | 5.6                             | <b>0.831</b>     |
| ≥200                              | 56                 | 43                 | 34              | 6                           | 71 (65, 78)                           | 79.2 (69.7, 88.7)            | 60.8 (49.4, 72.2)            | 18.4                            |                  |
| <b>Type of reporting centre</b>   |                    |                    |                 |                             |                                       |                              |                              |                                 |                  |
| Private                           | 9                  | 0                  | 0               | 0                           | 9 (9, 9)                              | 100.0 (100.0, 100.0)         | 0 (0.0, 0.0)                 | 100                             | <b>0.988</b>     |
| Public                            | 73                 | 66                 | 50              | 8                           | 97 (89, 104)                          | 75.9 (67.3, 84.4)            | 68.6 (59.3, 77.9)            | 7.3                             |                  |
| <b>Serogrup</b>                   |                    |                    |                 |                             |                                       |                              |                              |                                 |                  |
| B                                 | 66                 | 51                 | 43              | 4                           | 78 (73, 84)                           | 84.4 (76.4, 92.4)            | 65.2 (54.7, 75.8)            | 19.2                            | <b>0.661</b>     |
| C                                 | 8                  | 4                  | 4               | 0                           | 8 (8, 8)                              | 100 (100, 100)               | 50.0 (15.4, 84.7)            | 50.0                            |                  |

357

1  
2  
3  
4  
5  
6  
7  
8  
9  
10  
11  
12  
13  
14  
15  
16  
17  
18  
19  
20  
21  
22  
23  
24  
25  
26  
27  
28  
29  
30  
31  
32  
33  
34  
35  
36  
37  
38  
39  
40  
41  
42  
43  
44  
45  
46

358 SDR: Statutory disease reporting; MDR: Microbiological reporting system

359

For peer review only

## Meningococcal disease

360 The results of the multivariate model for all cases are shown in Table 5. The variables considered  
 361 to define the sensitivity of the two sources were year of report (2011-2013 versus 2014-2015) and  
 362 size of municipality. With these variables in the model, the adjusted estimate of the total number  
 363 of cases was 279 cases (95%CI 266-296) and the estimated incidence rate was 0.7/100,000  
 364 persons-year.

366 **Table 5. Variables defining the sensitivity of the SDR and MRS in detecting invasive**  
 367 **meningococcal diseases cases. Multivariate model.**

|                                                               | <b>OR (95%CI)</b> | <b><i>p</i>-value</b> |
|---------------------------------------------------------------|-------------------|-----------------------|
| <b>Year of report (2014-2015)</b>                             | 2.29 (1.35, 3.89) | <b>0.002</b>          |
| <b>Size of municipality (<math>\geq 10,000</math> people)</b> | 0.51 (0.23, 1.12) | 0.093                 |

370 OR: odds ratio; n estimate: 279 (266, 296)

## 372 DISCUSSION

373 The sensitivity obtained by combining the two surveillance system for IMD cases was 88.5%,  
 374 greater than for each source. Globally, the SDR showed higher sensitivity than the MDR, mainly  
 375 for cases of sepsis, serogroup B and serogroup C, although for meningitis the sensitivity of the  
 376 MDR was higher than that of the SDR.

377 Sensitivity of SDR was 67.9%, very close to that of 66.5% found by Andrianou et al. in Italy in a  
 378 study carried out in 2018 using the hospital discharge records system as the external source. [31]

379 Other studies found greater sensitivities by combining data systems than we did. Baldovin et al.  
 380 [32] in Italy, reported an overall sensitivity of 94.7% by combining four data sources (mandatory  
 381 notification system, laboratory surveillance, invasive bacterial surveillance and hospital  
 382 discharge). Jansson et al. [33], in Sweden, found a global sensitivity of 98.7%, 91.1% for clinical  
 383 notification and 85.4% for laboratory reporting. In Austria a good agreement between the National  
 384 Reference Center for meningococci and the hospital discharge was found, although a clinical  
 385 review of hospital discharge data was necessary to detect false positive cases recorded. [34]



## Meningococcal disease

1  
2  
3 387 Globally, the sensitivity was similar in children aged <15 years than in persons aged  $\geq 15$  years in  
4  
5 388 both sources (69.1% for the SDR and 66.5% for the MRS;  $P=0.468$ ). The differences could be  
6  
7 389 because there is greater sensibilization to declare pediatric cases than adult cases or because there  
8  
9 390 are differences on IMD incidence according to age. [9] Gibson et al., [35] in Australia, analysed  
10  
11 391 IMD sensitivity in children aged < 15 years in three sources: notifiable system, hospitalized  
12  
13 392 patients and mortality data. They found a greater sensitivity (99.5%) than we did, although 15%  
14  
15 393 of hospitalized children were false-positive cases.  
16  
17

394

18  
19  
20 395 Sensitivity was higher in 2014-2015 than in 2011-2013 for both sources (SDR and MRS). SDR  
21  
22 396 had overall higher sensitivity for IMD cases, septicaemia cases as well as serogroup B and C  
23  
24 397 cases, but not for meningitis cases for which MRS had higher sensitivity. The improvement in  
25  
26 398 notification in the years 2014-2015 may be due to different causes, one could be that there is  
27  
28 399 greater awareness for the notification of infectious diseases to public health surveillance systems,  
29  
30 400 although it should be analyzed in subsequent studies. In a different way, Andrianou et al [31]  
31  
32 401 compared the surveillance of the Italian IMD with the registry of hospital discharges, and found  
33  
34 402 a lower sensitivity in 2018 compared to 2015-2017. This yearly evaluation allows the detection  
35  
36 403 of problems in the notification process.  
37  
38

404

39  
40  
41 405 We found a greater sensitivity for meningitis in the MRS than in the SDR (72.5% vs 64.2%) but  
42  
43 406 not for septicaemia (61.1% vs 75.9%). Multiple reasons could explain this fact. A possible  
44  
45 407 explanation is that meningitis has a specific section in MRS for reporting while septicaemia is  
46  
47 408 reported in bacteraemia of unknown focus section and it could be confused. It is important to  
48  
49 409 determine the reason for this lower sensitivity to septicaemia in order to improve the completeness  
50  
51 410 of MRS reporting. It is difficult to compare our results with those of other studies, since other  
52  
53 411 sources of information were used or the independence of data sources was presumed but not  
54  
55 412 demonstrated, [34] which is essential when using the capture-recapture method.  
56  
57

413

## Meningococcal disease

1  
2  
3 414 Notification of confirmed cases of IMD by laboratories is essential in epidemiological  
4  
5 415 surveillance. [36] Molecular information on circulating serogroups that is required to implement  
6  
7 416 public health measures such as vaccination is essential to control the disease [37] and evaluate  
8  
9 417 the impact of available vaccines.  
10

418

11  
12  
13 419 In the absence of automated electronic reporting, monitoring and increasing the speed of  
14  
15 420 laboratory reports may allow the public health department to administer chemoprophylaxis and  
16  
17 421 vaccination to contacts. [27] Although a higher sensitivity has been reported for electronic  
18  
19 422 reporting than for paper-based reports by some authors, [38] during the study period, electronic  
20  
21 423 surveillance was used in the SDR but not in the MDR, which may explain, at least in part, why  
22  
23 424 the MDR had a lower sensitivity than the SDR. [39]  
24

425

25  
26  
27  
28 426 In the multivariate model, the 2014-2015 period and the size of the municipality show a higher  
29  
30 427 sensitivity in the SDR, suggesting that IMD was well recorded in the two surveillance systems,  
31  
32 428 although 36 cases (11.5%) were not captured by either source. This suggests there was  
33  
34 429 underreporting, despite the clinical severity of the disease. Other authors have also found  
35  
36 430 underreporting of this disease. [40] It is very important to improve reporting by all physicians and  
37  
38 431 microbiologists to the SDR and MDR to assess the impact of interventions such as immunization.  
39

432

40  
41  
42  
43 433 The estimated IMD incidence rate of 0.7/100, 000 persons-year found in the multivariate model  
44  
45 434 is less than that found using capture-recapture (0.83/100,000 persons-year) but higher than that  
46  
47 435 calculated using the SDR (0.56/100,000 persons-year) or MDR data (0.54/100,000 persons-year).  
48  
49 436 Other European studies showed incidence rates of between 0.39 [32] and 1.18/100,000 persons-  
50  
51 437 year. [34]  
52

438

53  
54  
55 439 The sensitivity of the two sources were intermediate (67.9% for the SDR and 64.7% for the MRS).  
56  
57 440 The lower sensitivity of the MRS may be due to the fact that the MRS is a sentinel system with a  
58  
59 441 coverage of 83% of acute hospital beds and without private centres. In our series, 21 cases (10%)

## Meningococcal disease

1  
2  
3 442 included in the SDR were reported by private centres, while only one case (0.5%) was reported  
4  
5 443 to the MSR; this patient was finally transferred to a public hospital. The inclusion of cases that  
6  
7 444 have an equal probability of selection in one source might lead to an overestimation. Other authors  
8  
9 445 have reported this limitation when the hospital discharge data set includes probable cases which  
10  
11 446 are not included in the reference centre. [34]  
12

13 447

14  
15 448 Death was registered in 22 cases (10.5%), similar to that reported in other European countries [2]  
16  
17 449 but slightly lower than that observed in Italy (14%) using the capture-recapture method. [32] All  
18  
19 450 cases were reported to the SDR but only 50% were reported to the MRS, indicating that clinical  
20  
21 451 data are better in the SDR than in the MRS. Other authors have used mortality data for capture-  
22  
23 452 recapture analysis and concluded that all deaths were reported in notifiable systems. [34]  
24

25 453

26  
27  
28 454 The sensitivity of the sources studied for the surveillance of IMD cannot be generalized to other  
29  
30 455 diseases because physicians' or microbiologists' perception of the importance of IMD differs  
31  
32 456 from that of other diseases. [38]  
33

34 457

35  
36  
37 458 The main strength of this study is that the two sources had wide coverage. The SDR is a universal  
38  
39 459 epidemiological surveillance source and, unlike the MDR, is a sentinel source, with a high  
40  
41 460 coverage of 83%. Cases with PIC accounted for 85.5% of all cases reported to detect whether  
42  
43 461 cases were coincident or not. In addition, the independence of the two sources was demonstrated,  
44  
45 462 complying with the premise of the capture-recapture method.  
46

47 463

48  
49 464 A limitation of the study was that not all cases had the same probability of being selected from a  
50  
51 465 given source. Cases diagnosed in private centres or public centres that did not participate in the  
52  
53 466 MRS could not be reported by this system and this may explain, at least in part, the lower  
54  
55 467 sensitivity than the SDR. This highlights the importance of including public and private centres  
56  
57 468 to increase the robustness of the MRS. Another limitation was that we did not analyse the role of  
58  
59  
60

## Meningococcal disease

1  
2  
3 469 the electronic surveillance system, although a previous study detected greater sensitivity of the  
4  
5 470 SDR when electronic surveillance was introduced. [39]

6  
7 471

### 472 **CONCLUSIONS**

11 473 The sensitivity of enhanced surveillance through the combination of two complementary sources  
12  
13 474 (statutory reporting by physicians and microbiological reporting by microbiologists) was higher  
14  
15 475 than that of the individual sources. These systems are complementary and constitute the basic  
16  
17 476 sources of information necessary for adequate epidemiological surveillance of IMD. Specific  
18  
19 477 studies to estimate the factors associated with under-reporting are needed to reinforce  
20  
21 478 epidemiological surveillance of this disease.  
22

23  
24 479

25  
26  
27 480

### 30 481 **DECLARATIONS**

#### 33 482 **Ethics approval and consent to participate**

34  
35  
36 483 Not applicable  
37

#### 39 484 **Consent of publication**

40  
41  
42 485 Not applicable  
43

#### 45 486 **Availability of data and materials**

46  
47  
48 487 The datasets used and analysed during the current study available from the corresponding author  
49  
50 488 on reasonable request.

#### 52 489 **Competing interests**

53  
54 490 The authors declare that they have no competing interests.  
55

#### 56 491 **Funding**

57  
58  
59  
60

## Meningococcal disease

1  
2  
3 492 This work was supported partially by CIBER of Epidemiology and Public Health (CIBERESP),  
4  
5 493 Carlos III Health Institute and the Catalan Agency for the Management of Grants for University  
6  
7 494 Research [AGAUR Grant Number 2017 / SGR 1342]. The funding sources played no part in the  
8  
9 495 design of the study and collection, analysis, and interpretation of data and in writing the  
10  
11 496 manuscript.

497 **Author contributions**

16 498 PC analyzed and interpreted data, studied conception and design of the study and writes the  
17  
18 499 manuscript; MV and NS did statistical analysis; GC revised and collected data; TG,SH,LR  
19  
20 500 collected data; MJ revised the study and AD did critical revision and got funding.

501 **Acknowledgements**502 **The Working Group of the Microbiological Reporting System of Catalonia is composed by:**

503 M. Teresa Bastida (Fundació Hospital Esperit Sant); Frederic Ballester; Isabel Pujol (Hospital  
504 Universitari de Sant Joan de Reus); Miguel Ángel Benítez, Alba Cebollero (Consorti de  
505 Laboratoris Intercomarcal de l'Alt Penedès); Jordi Vila, Jordi Bosch, (Hospital Clínic); Ana  
506 Calderón (Hospital Municipal de Badalona); Margarida Curriu (Hospital Comarcal de Sant  
507 Bernabé); M. Ángeles Domínguez, Fe Tubau Quintano (Hospital Universitari de Bellvitge); Jose  
508 Manuel Ramírez (Hospital Universitari de Girona Dr. Josep Trueta); Ma José Fusté (Clínica de  
509 Terres de l'Ebre); Carme Gallés, Pilar Hernández Pérez, Elisenda Capdevila Gil de Bernabé  
510 Corporació de Salut del Maresme i La Selva); Paula Gassiot (Hospital de Figueres); Frederic  
511 Gómez (Hospital Universitari de Tarragona Joan XXIII); Araceli González-Cuevas (Hospital  
512 General del Parc Sanitari Sant Joan de Déu); Marius Juanpere (Hospital Móra d'Ebre); Carmen  
513 Muñoz-Almagro, Amaresh Pérez-Argüello (Hospital Sant Joan de Déu. Esplugues de Llobregat);  
514 Carmina Martí (Hospital General de Granollers); Núria Margall (Hospital de la Santa Creu i Sant  
515 Pau); Lurdes Matas, Montserrat Gimenez (Hospital Universitari Germans Trias i Pujol);  
516 Montserrat Morta, Glòria Trujillo (Hospital Sant Joan de Déu. Manresa-Fundació Althaia); Sílvia  
517 Noguera (Hospital del Vendrell); Montserrat Olsina (Hospital General de Catalunya); Amaia

## Meningococcal disease

1  
2  
3 518 Oteiza (H. Palamós); Pepa Pérez (Catlab-Centre Analítics Terrassa); Mar Olga Pérez-Moreno  
4  
5 519 (Hospital Verge de la Cinta de Tortosa); Tomás Pumarola, Juanjo González (Hospital Universitari  
6  
7 520 Vall d'Hebron); Xavier Raga (Hospital de Sant Pau i Santa Tecla); Mercè Garcia, Mercè Ribelles  
8  
9 521 (Hospital Universitari Arnau de Vilanova de Lleida); Esther Sanfeliu (Hospital d'Olot Comarcal  
10  
11 522 de la Garrotxa); Goretti Sauca (Hospital de Mataró); Dionisia Fontanals, Isabel Sanfeliu  
12  
13 523 (Corporació Sanitaria Parc Taulí, Sabadell) i Anna Vilamala (Hospital General de Vic).

524 **The Working Group of the Epidemiological Surveillance Network of Catalonia is composed**525 **by:**

21 526 César Arias, Irene Barrabeig, Neus Camps, Mònica Carol, Núria Follia, Pere Godoy, Ana  
22  
23 527 Martínez, Sofia Minguell, Ignasi Parron, M<sup>a</sup> Rosa Sala-Farré, Ariadna Rovira (Agència de Salut  
24  
25 528 Pública de Catalunya), Cristina Rius (Agència de Salut Pública de Barcelona).

529

530 **Working Group of the Microbiological Reporting System of Catalonia and Working**531 **Group of the Epidemiological Surveillance Network of Catalonia**

532

533 Maria Teresa Bastida

534 Laboratori de Microbiologia

535 Fundació Hospital Esperit Sant

536 C/ Pons i Rabadà s/n

537 08923 Santa Coloma de Gramenet, Spain

538

539 Frederic Ballester

540 Laboratori de Referència Sud

541 Hospital Sant Joan de Reus

542 Av. Dr Josep Laporte, 2,

543 43204 Reus, Tarragona, Spain

## Meningococcal disease

- 1  
2  
3 544  
4  
5 545 Isabel Pujol  
6  
7 546 Laboratori de Referencia Sud  
8  
9 547 Hospital Sant Joan de Reus  
10  
11 548 Av. Dr Josep Laporte, 2,  
12  
13 549 43204 Reus, Tarragona, Spain  
14  
15 550  
16  
17 551 Miguel Angel Benítez  
18  
19 552 Servei de Microbiologia  
20  
21 553 CLILAB Diagnòstics  
22  
23 554 C/ Espirall, s/n  
24  
25 555 08720 Vilafranca del Penedès, Barcelona, Spain  
26  
27 556  
28  
29 557 Alba Cebollero  
30  
31 558 Servei de Microbiologia  
32  
33 559 CLILAB Diagnòstics  
34  
35 560 C/ Espirall, s/n  
36  
37 561 08720 Vilafranca del Penedès, Barcelona, Spain  
38  
39 562  
40  
41 563 Jordi Vila  
42  
43 564 Servei de Microbiologia  
44  
45 565 Hospital Clínic de Barcelona  
46  
47 566 C/ Villarroel, 170  
48  
49 567 08036 Barcelona, Spain.  
50  
51 568  
52  
53 569 Jordi Bosch  
54  
55 570 Servei de Microbiologia  
56  
57 571 Hospital Clínic de Barcelona  
58  
59  
60

## Meningococcal disease

- 1  
2  
3 572 C/ Villarroel, 170  
4  
5 573 08036 Barcelona, Spain.  
6  
7 574  
8  
9 575 Ana Calderon  
10  
11 576 Servei de Microbiologia  
12  
13 577 Hospital Municipal de Badalona  
14  
15 578 C/ Via Augusta, 9-13  
16  
17 579 08911 Badalona, Barcelona, Spain  
18  
19  
20 580  
21  
22 581 Margarida Curriu  
23  
24 582 Servei de Microbiologia  
25  
26 583 Hospital Sant Bernabé  
27  
28 584 Ctra. de Ribes, s/n  
29  
30 585 08600 Berga, Spain  
31  
32 586  
33  
34 587 M Angeles Dominguez  
35  
36 588 Hospital Universitari de Bellvitge, Universitat de Barcelona,  
37  
38 589 C/ Feixa Llarga s/n  
39  
40 590 08907 L'Hospitalet, Barcelona, Spain  
41  
42  
43 591  
44  
45 592 Fe Tubau Quintano  
46  
47 593 Hospital Universitari de Bellvitge, Universitat de Barcelona,  
48  
49 594 C/ Feixa Llarga s/n  
50  
51 595 08907 L'Hospitalet, Barcelona, Spain  
52  
53 596  
54  
55 597 Jose Manuel Ramirez  
56  
57 598 Àrea de Microbiologia, Laboratori Clínic - Institut Català de la Salut Girona  
58  
59 599 Hospital Universitari Dr. Josep Trueta



## Meningococcal disease

- 1  
2  
3 600 Av. França, s/n  
4  
5 601 17007 Girona, Spain  
6  
7 602  
8  
9 603 M<sup>a</sup> Jose Fusté  
10  
11 604 Servei de Microbiologia  
12  
13 605 Clínica Terres de l'Ebre  
14  
15 606 Pl. De Joaquim Bau, 6-8  
16  
17 607 43500 Tortosa, Tarragona, Spain  
18  
19 608  
20  
21 609 Carme Gallés  
22  
23 610 Unitat de Microbiologia, Servei d'Anàlisis Clíniques  
24  
25 611 Corporació de Salut del Maresme i la Selva  
26  
27 612 C/ Sant Jaume, 209-217  
28  
29 613 08370 Calella, Barcelona, Spain  
30  
31 614  
32  
33 615 Pilar Hernandez Pérez  
34  
35 616 Unitat de Microbiologia, Servei d'Anàlisis Clíniques  
36  
37 617 Corporació de Salut del Maresme i la Selva.  
38  
39 618 C/ Sant Jaume, 209-217  
40  
41 619 08370 Calella, Barcelona, Spain  
42  
43 620  
44  
45 621 Elisenda Capdevila Gil de Bernabe  
46  
47 622 Unitat de Microbiologia, Servei d'Anàlisis Clíniques  
48  
49 623 Corporació de Salut del Maresme i la Selva.  
50  
51 624 C/ Sant Jaume, 209-217  
52  
53 625 08370 Calella, Barcelona, Spain  
54  
55 626  
56  
57 627 Paula Gassiot  
58  
59  
60

## Meningococcal disease

- 1  
2  
3 628 Àrea de Microbiologia, Laboratori d'Anàlisi Clíniques  
4  
5 629 Hospital de Figueres  
6  
7 630 Rda. Rector Arolas, s/n  
8  
9 631 17600 Figueres, Girona, Spain  
10  
11 632  
12  
13 633 Frederic Gómez-Bertomeu  
14  
15 634 Àrea de Microbiologia, Laboratori Clínic ICS - Camp de Tarragona  
16  
17 635 Hospital Joan XXIII  
18  
19 636 C/ Dr. Mallafrè Guasch, 4  
20  
21 637 43005 Tarragona, Spain  
22  
23 638  
24  
25 639 Araceli González-Cuevas  
26  
27 640 Laboratori de Microbiologia  
28  
29 641 Hospital General del Parc Sanitari Sant Joan de Déu  
30  
31 642 Camí Vell de la Colònia, 25  
32  
33 643 08830 Sant Boi de Llobregat, Barcelona, Spain  
34  
35 644  
36  
37 645 Marius Juanpere  
38  
39 646 Servei de Microbiologia  
40  
41 647 Hospital Comarcal Móra d'Ebre  
42  
43 648 C/ de Benet Messeguer, s/n  
44  
45 649 43770 Móra d'Ebre, Tarragona, Spain  
46  
47 650  
48  
49 651 Carmen Muñoz-Almagro  
50  
51 652 Hospital Universitari Sant Joan de Déu  
52  
53 653 Pg. Sant Joan de Déu 2  
54  
55 654 08950 Esplugues, Barcelona, Spain  
56  
57  
58  
59  
60 655

## Meningococcal disease

- 1  
2  
3 656 Amaresch Perez Arguello  
4  
5 657 Hospital Universitari Sant Joan de Déu  
6  
7 658 Pg. Sant Joan de Déu 2  
8  
9 659 08950 Esplugues, Barcelona, Spain  
10  
11 660  
12  
13 661 Carmina Martí  
14  
15 662 Laboratori de Microbiologia  
16  
17 663 Hospital General de Granollers  
18  
19 664 Av. Francesc Ribas, s/n  
20  
21 665 08402 Granollers, Barcelona, Spain  
22  
23 666  
24  
25 667 Nuria Margall  
26  
27 668 Servei de Microbiologia  
28  
29 669 Hospital Santa Creu i Sant Pau  
30  
31 670 C/ de Sant Quintí, 89  
32  
33 671 08041 Barcelona, Spain  
34  
35 672  
36  
37 673 Lurdes Matas  
38  
39 674 Laboratori clínic Metropolitana Nord  
40  
41 675 Hospital Universitari Germans Trias i Pujol  
42  
43 676 Ctra. de Canyet, s/n  
44  
45 677 08916 Badalona, Barcelona, Spain  
46  
47 678  
48  
49 679 Montserrat Giménez  
50  
51 680 Laboratori clínic Metropolitana Nord  
52  
53 681 Hospital Universitari Germans Trias i Pujol  
54  
55 682 Ctra. de Canyet, s/n  
56  
57 683 08916 Badalona, Barcelona, Spain  
58  
59  
60

## Meningococcal disease

- 1  
2  
3 684  
4  
5 685 Montserrat Morta  
6  
7 686 Servei de Microbiologia  
8  
9 687 Hospital Sant Joan de Déu. Fundació ALTHAIA  
10  
11 688 C/ Dr. Joan Soler, s/n  
12  
13 689 08243 Manresa, Barcelona, Spain  
14  
15 690  
16  
17 691 Gloria Trujillo  
18  
19 692 Servei de Microbiologia  
20  
21 693 Hospital Sant Joan de Déu. Fundació ALTHAIA  
22  
23 694 C/ Dr. Joan Soler, s/n  
24  
25 695 08243 Manresa, Barcelona, Spain  
26  
27 696  
28  
29 697 Silvia Noguer  
30  
31 698 Hospital del vendrell  
32  
33 699 Ctra. Barcelona, s/n,  
34  
35 700 43700 El Vendrell, Tarragona, Spain  
36  
37 701  
38  
39 702 Montserrat Olsina  
40  
41 703 Laboratori d'Anàlisis Clínic, Microbiologia  
42  
43 704 Hospital General de Catalunya  
44  
45 705 C/ Pedro i Pons, 1  
46  
47 706 08190 Sant Cugat del Vallès, Barcelona, Spain  
48  
49 707  
50  
51 708 Amaia Oteiza Ubanell  
52  
53 709 Laboratori d'Anàlisis Clínic  
54  
55 710 Hospital de Palamós  
56  
57  
58  
59  
60

## Meningococcal disease

- 1  
2  
3 711 C/ Hospital, 36,  
4  
5 712 17230 Palamós, Spain  
6  
7 713  
8  
9 714 Pepa Perez  
10  
11 715 Departament de Microbiologia, Catlab - Centre Analítiques Terrassa, AIE  
12  
13 716 Parc Logístic de Salut  
14  
15 717 Vial Sant Jordi, s/n  
16  
17 718 08232 Viladecavalls, Barcelona, Spain  
18  
19 719  
20  
21  
22 720 Mar Olga Pérez-Moreno  
23  
24 721 Àrea de Microbiologia, Laboratori Clínic ICS - Terres de l'Ebre  
25  
26 722 Hospital Verge de la Cinta  
27  
28 723 C/ de les Esplanetes, 14  
29  
30 724 43500 Tortosa, Tarragona, Spain  
31  
32 725  
33  
34 726 Tomas Pumarola  
35  
36 727 Servei de Microbiologia  
37  
38 728 Hospital Universitari Vall d'Hebron  
39  
40 729 Pg. De la Vall d'Hebron, 119-129  
41  
42 730 08035 Barcelona, Spain  
43  
44 731  
45  
46 732 Juanjo Gonzales  
47  
48 733 Servei de Microbiologia  
49  
50 734 Hospital Universitari Vall d'Hebron  
51  
52 735 Pg. De la Vall d'Hebron, 119-129  
53  
54 736 08035 Barcelona, Spain  
55  
56 737  
57  
58 738 Xavier Raga  
59  
60

## Meningococcal disease

- 1  
2  
3 739 Laboratori de Microbiologia  
4  
5 740 Hospital Sant Pau i Santa Tecla  
6  
7 741 Rambla Vella, 14  
8  
9 742 43003 Tarragona, Spain  
10  
11 743  
12  
13 744 Mercè Garcia  
14  
15 745 Secció Microbiologia, Servei d'Anàlisis Clíniques  
16  
17 746 Hospital Universitari Arnau de Vilanova de Lleida  
18  
19 747 Av. Rovira Roure, 80  
20  
21 748 25198 Lleida, Barcelona, Spain  
22  
23 749  
24  
25 750 Mercè Ribelles  
26  
27 751 Secció Microbiologia, Servei d'Anàlisis Clíniques  
28  
29 752 Hospital Universitari Arnau de Vilanova de Lleida  
30  
31 753 Av. Rovira Roure, 80  
32  
33 754 25198 Lleida, Barcelona, Spain  
34  
35 755  
36  
37 756 Esther Sanfeliu  
38  
39 757 Servei d'Anàlisis Clíniques, Secció de Microbiologia  
40  
41 758 Hospital d'Olot Comarcal de la Garrotxa  
42  
43 759 Av. dels Països Catalans, 86  
44  
45 760 17800 Olot, Girona, Spain  
46  
47 761  
48  
49 762 Goretti Sauca  
50  
51 763 Servei d'Anàlisis clíniques, secció de Microbiologia  
52  
53 764 Hospital de Mataró  
54  
55 765 Ctra. de Cirera, 230  
56  
57 766 08304 Mataró, Barcelona, Spain  
58  
59  
60

## Meningococcal disease

- 1  
2  
3 767  
4  
5 768 Dionisia Fontanals  
6  
7 769 Secció de Microbiologia  
8  
9 770 Parc Taulí Hospital Universitari, Institut d'Investigació i Innovació Parc Taulí I3PT, UAB  
10  
11 771 C/ Parc del Taulí, 1  
12  
13 772 08208 Sabadell, Barcelona, Spain  
14  
15 773 Isabel Sanfeliu  
16  
17 774 Secció de Microbiologia  
18  
19 775 Parc Taulí Hospital Universitari, Institut d'Investigació i Innovació Parc Taulí I3PT, UAB  
20  
21 776 C/ Parc del Taulí, 1  
22  
23 777 08208 Sabadell, Barcelona, Spain  
24  
25  
26 778  
27  
28 779 Anna Vilamala  
29  
30 780 Servei de Microbiologia  
31  
32 781 Consorci Hospitalari de Vic  
33  
34 782 C/ Francesc Pla 'El Vigatà', 1  
35  
36 783 08500 Vic, Barcelona, Spain  
37  
38 784  
39  
40  
41 785 **The Working Group of the Epidemiological Surveillance Network of Catalonia is composed**  
42  
43 786 **by:**  
44  
45 787 César Arias  
46  
47 788 Servei de Vigilància Epidemiològica i Resposta a Emergències de Salut Pública al Vallès  
48  
49 789 Occidental i Vallès Oriental  
50  
51 790 Carretera de Vallvidrera, 38 (CAP Turó de Can Mates)  
52  
53 791 08173 Sant Cugat del Vallès, Spain  
54  
55 792  
56  
57 793 Irene Barrabeig  
58  
59 794 Servei de Vigilància Epidemiològica i Resposta a Emergències de Salut Pública a Barcelona Sud  
60

## Meningococcal disease

- 1  
2  
3 795 Carrer de la Feixa Llarga, s/n, Antiga Escola d'Infermeria, 3a. planta (Hospital Universitari de  
4  
5 796 Bellvitge)  
6  
7 797 08907 L'Hospitalet de Llobregat, Spain  
8  
9 798  
10  
11 799 Neus Camps  
12  
13 800 Servei de Vigilància Epidemiològica i Resposta a Emergències de Salut Pública a Girona  
14  
15 801 Plaça de Pompeu Fabra, 1  
16  
17 802 17002 Girona, Spain  
18  
19  
20 803  
21  
22 804 Mònica Carol  
23  
24 805 Servei de Vigilància Epidemiològica i Resposta a Emergències de Salut Pública a la Catalunya  
25  
26 806 Central  
27  
28 807 Carrer Muralla de Sant Francesc, 49 4a planta - Edifici Pere III  
29  
30 808 08241 Manresa, Spain  
31  
32 809  
33  
34 810 Núria Follia  
35  
36 811 Servei de Vigilància Epidemiològica i Resposta a Emergències de Salut Pública a Girona  
37  
38 812 Plaça de Pompeu Fabra, 1  
39  
40 813 17002 Girona, Spain  
41  
42  
43 814  
44  
45 815 Pere Godoy  
46  
47 816 Servei de Vigilància Epidemiològica i Resposta a Emergències de Salut Pública a Lleida i Alt  
48  
49 817 Pirineu i Aran  
50  
51 818 Avinguda de l'Alcalde Rovira Roure, 2  
52  
53 819 25006 Lleida, Spain  
54  
55 820  
56  
57 821 Ana Martínez  
58  
59 822 Sub-direcció General de Vigilància i Resposta a Emergències de Salut Pública  
60



## Meningococcal disease

- 1  
2  
3 823 Agència de Salut Pública de Catalunya, Generalitat de Catalunya  
4  
5 824 C/ Roc Boronat, 81-95  
6  
7 825 08005 Barcelona, Spain  
8  
9 826  
10  
11 827 Sofia Minguell  
12  
13 828 Servei de Vigilància Epidemiològica i Resposta a Emergències de Salut Pública al Camp de  
14  
15 829 Tarragona i Terres de l'Ebre  
16  
17 830 Avinguda de la Reina Maria Cristina, 54  
18  
19 831 43002 Tarragona, Spain  
20  
21  
22 832  
23  
24 833 Ignasi Parron  
25  
26 834 Servei de Vigilància Epidemiològica i Resposta a Emergències de Salut Pública al Barcelonès  
27  
28 835 Nord i Maresme  
29  
30 836 C/ Roc Boronat, 81-95  
31  
32 837 08005 Barcelona, Spain  
33  
34 838  
35  
36 839 M<sup>a</sup> Rosa Sala-Farré  
37  
38 840 Servei de Vigilància Epidemiològica i Resposta a Emergències de Salut Pública al Vallès  
39  
40 841 Occidental i Vallès Oriental  
41  
42 842 Carretera de Vallvidrera, 38 (CAP Turó de Can Mates)  
43  
44 843 08173 Sant Cugat del Vallès, Spain  
45  
46 844  
47  
48 845 Ariadna Rovira  
49  
50 846 Servei de Vigilància Epidemiològica i Resposta a Emergències de Salut Pública a Barcelona Sud  
51  
52 847 Carrer de la Feixa Llarga, s/n, Antiga Escola d'Infermeria, 3a. planta (Hospital Universitari de  
53  
54 848 Bellvitge)  
55  
56 849 08907 L'Hospitalet de Llobregat, Spain  
57  
58  
59  
60 850

## Meningococcal disease

1  
2  
3 851 Cristina Rius  
4  
5 852 Agència de Salut Pública de Barcelona  
6  
7 853 Plaça de Lesseps, 1  
8  
9 854 08023 Barcelona, Spain  
10

11 855  
12  
13

14 856 **References**  
15

- 16  
17 857 1. World Health Organization. Laboratory methods for the diagnosis of meningitis caused  
18  
19 858 by *Neisseria meningitidis*, *Streptococcus pneumoniae*, and *Haemophilus influenzae*:  
20  
21 859 WHO manual, 2nd ed. Geneva: WHO, 2011.  
22  
23 860 2. European Center for Disease Control. Surveillance atlas on infectious diseases, 2018.  
24  
25 Available at: [https://www.ecdc.europa.eu/en/meningococcal-disease/surveillance-and-](https://www.ecdc.europa.eu/en/meningococcal-disease/surveillance-and-disease-data/atlas)  
26 861 [disease-data/atlas](https://www.ecdc.europa.eu/en/meningococcal-disease/surveillance-and-disease-data/atlas)  
27 862  
28  
29 863 3. Centro Nacional de Epidemiología. Enfermedades de declaración obligatoria. España  
30  
31 864 2018. Available at:  
32  
33 [https://www.isciii.es/QueHacemos/Servicios/VigilanciaSaludPublicaRENAVE/Enferme-](https://www.isciii.es/QueHacemos/Servicios/VigilanciaSaludPublicaRENAVE/EnfermedadesTransmisibles/Documents/INFORMES/INFORMESRENAVE/RENAVE_cierre_EDO_2018.pdf)  
34 865 [dadesTransmisibles/Documents/INFORMES/INFORMES](https://www.isciii.es/QueHacemos/Servicios/VigilanciaSaludPublicaRENAVE/EnfermedadesTransmisibles/Documents/INFORMES/INFORMESRENAVE/RENAVE_cierre_EDO_2018.pdf)  
35 866 [RENAVE/RENAVE\\_cierre\\_EDO\\_2018.pdf](https://www.isciii.es/QueHacemos/Servicios/VigilanciaSaludPublicaRENAVE/EnfermedadesTransmisibles/Documents/INFORMES/INFORMESRENAVE/RENAVE_cierre_EDO_2018.pdf)  
36 867  
37  
38 868 4. Stephens DS. *Neisseria meningitidis*. In: Bennet JE, Dolin R, Blaser MJ, editors.  
39  
40 Principles and practice of infectious diseases. 9th ed. Philadelphia: Elsevier :2585-607.  
41 869  
42  
43 870 5. Nuttens C, Findlow J, Balmer P, Swerdlow DL, Htar MTT. Evolution of meningococcal  
44  
45 disease epidemiology in Europe, 2008 to 2017. *Euro Surv* 2022; 27: 2002075.  
46 871  
47  
48 872 6. Wang CB, Santoreneos R, Giles L, Ali Afzali HH, Marshall H. Case fatality rates of  
49  
50 invasive meningococcal disease by serogroup and age: A systematic review and meta-  
51 873 analysis. *Vaccine* 2019; 37:2768-82.  
52 874  
53  
54 875 7. Beebeejaun K, Parikh SR, Campbell H, et al. Invasive meningococcal disease: Timing  
55  
56 and cause of death in England, 2008–2015. *J Infection* 2020; 80: 286-90.  
57 876  
58  
59  
60

## Meningococcal disease

- 1  
2  
3 877 8. Loenenbach AD, van der Ende A, de Melker HE, Sanders EAM, Knol MJ. The clinical  
4  
5 878 picture and severity of invasive meningococcal disease serogroup W compared with other  
6  
7 879 serogroups in the Netherlands, 2015–2018. *Clin Infect Dis* 2020; 70:2036–44.  
8  
9 880 9. Acevedo R, Bai X, Borrow R, et al. The global meningococcal initiative meeting on  
10  
11 881 prevention of meningococcal disease worldwide: epidemiology, surveillance,  
12  
13 882 hypervirulent strains, antibiotic resistance and high risk populations. *Expert Rev*  
14  
15 883 *Vaccines* 2019; 18: 15-30.  
16  
17 884 10. Salama M, Kopel B, Jaffe J, et al. Surveillance of invasive meningococcal disease in the  
18  
19 885 Tel Aviv District, Israel, 2007–2017. *Vaccine* 2019; 37: 6186-91.  
20  
21 886 11. Van CP, Nguyen TT, Bui ST, et al. Invasive meningococcal disease remains a health  
22  
23 887 threat in Vietnam people’s army. *Infect Drug Resist* 2021; 14: 5261-9.  
24  
25 888 12. Red Nacional de Vigilancia Epidemiológica. Enfermedad meningocócica. Vigilancia de  
26  
27 889 la temporada 2017-2018. Available at:  
28  
29  
30  
31 890 <https://www.isciii.es/QueHacemos/Servicios/VigilanciaSaludPublicaRENAVE/Enferme>  
32  
33 891 <dadesTransmisibles/Documents/archivos%20A->  
34  
35 892 [Z/Enfer\\_Meningoc%C3%B3cica/RENAVE\\_EMI-2017-18.pdf](Z/Enfer_Meningoc%C3%B3cica/RENAVE_EMI-2017-18.pdf)  
36  
37  
38 893 13. Igidbashian S, Bertizzolo I, Tognetto A, et al. Invasive meningococcal disease in Italy:  
39  
40 894 from analysis of national data to an evidence-based vaccination strategy. *J Prev Med Hyg*  
41  
42 895 2020; 61: e152-e161.  
43  
44 896 14. Olbrich KJ, Müller D, Schumacher S, Beck E, Meszaros K, Koerber F. Systematic review  
45  
46 897 of invasive meningococcal disease: sequelae and quality of life impact on patients and  
47  
48 898 their caregivers. *Infect Dis Ther* 2018; 7: 421–38.  
49  
50 899 15. CDC Guidelines Working Group. Updated guidelines for evaluating public health  
51  
52 900 surveillance systems. *Morb Mortal Wkly Rep* 2001; 50:1–35.  
53  
54 901 16. WHO. Protocol for the evaluation of epidemiological surveillance systems.  
55  
56 902 <https://apps.who.int/iris/handle/10665/63639> (Last accessed 6 September 2020).  
57  
58  
59  
60

## Meningococcal disease

- 1  
2  
3 903 17. Romaguera RA, German RR, Klaucke DN. Evaluating public health surveillance. In:  
4  
5 904 Teutsch SM, Churchill RE, eds. Principles and practice of public health surveillance. New  
6  
7 905 York: Oxford University Press, 2000: 176–193.  
8  
9 906 18. Generalitat de Catalunya. Decret 2013/2015, de 15 de setembre, pel qual es crea la Xarxa  
10  
11 907 de Vigilància Epidemiològica i es regulen els sistemes de notificació de malalties de  
12  
13 908 declaració obligatòria i els brots epidèmics. DOGC 2015; 6958:1-19.  
14  
15 909 19. Laska EM. The use of capture-recapture methods in public health. Bull World Health  
16  
17 910 Organ 2002; 80:845.  
18  
19 911 20. Freixa Blanxart M, Guàrdia Olmos J, Honrubia Serrano ML, Però Cebollero. Validation  
20  
21 912 of the capture –recapture method. Psicotema 2000; 12(Suppl 2):231-5.  
22  
23 913 21. Statistical Institute of Catalonia. Statistical Institute of Catalonia. 2015.  
24  
25 914 <https://www.idescat.cat> (Last accessed 18 January 2019).  
26  
27 915 22. Generalitat de Catalunya. Manual de notificació per als declarants al sistema de  
28  
29 916 notificació de malalties de declaració obligatòria (MDO). 2016.  
30  
31 917 [https://canalsalut.gencat.cat/web/.content/Professionals/Vigilancia\\_epidemiologica/do](https://canalsalut.gencat.cat/web/.content/Professionals/Vigilancia_epidemiologica/documentos/arxius/MANUAL_MDO_2016.pdf)  
32  
33 918 [cuments/arxius/MANUAL\\_MDO\\_2016.pdf](https://canalsalut.gencat.cat/web/.content/Professionals/Vigilancia_epidemiologica/documentos/arxius/MANUAL_MDO_2016.pdf) (Last accessed 27 January 2021).  
34  
35 919 23. Generalitat de Catalunya. Manual de procediment de notificació microbiològica  
36  
37 920 obligatòria (SNMC). 2016.  
38  
39 921 [https://canalsalut.gencat.cat/web/.content/Professionals/Vigilancia\\_epidemiologica/do](https://canalsalut.gencat.cat/web/.content/Professionals/Vigilancia_epidemiologica/documentos/arxius/manual_procediment.pdf)  
40  
41 922 [cuments/arxius/manual\\_procediment.pdf](https://canalsalut.gencat.cat/web/.content/Professionals/Vigilancia_epidemiologica/documentos/arxius/manual_procediment.pdf) (last accessed 27 January 2021).  
42  
43 923 24. Ciruela P, Izquierdo C, Broner S et al. Epidemiology of invasive pneumococcal disease  
44  
45 924 in Catalonia Report 2012-2016. Generalitat de Catalunya 2018.  
46  
47 925 [https://canalsalut.gencat.cat/web/.content/Professionals/Vigilancia\\_epidemiologica/do](https://canalsalut.gencat.cat/web/.content/Professionals/Vigilancia_epidemiologica/documentos/arxius/invasive_pneumococcal_2012_2016_ang.pdf)  
48  
49 926 [cuments/arxius/invasive\\_pneumococcal\\_2012\\_2016\\_ang.pdf](https://canalsalut.gencat.cat/web/.content/Professionals/Vigilancia_epidemiologica/documentos/arxius/invasive_pneumococcal_2012_2016_ang.pdf) (Last accessed 27 January  
50  
51 927 2021).  
52  
53 928 25. Chapman DG. Some properties of the hypergeometric distribution with applications to  
54  
55 929 zoological sample censuses. Berkeley: University of California Press, 1951.  
56  
57  
58  
59  
60

## Meningococcal disease

- 1  
2  
3 930 26. Ballivet S, Salmi LR, Dubourdieu D. Capture-recapture method to determine the best  
4  
5 931 design of surveillance system. Application to a thyroid cancer registry. *Eur J Epidemiol*  
6  
7 932 2000; 16:147-53.  
8  
9 933 27. Tilling K, Sterne JAC, Wolfe CDA. Estimation of the incidence of stroke using a capture-  
10  
11 934 recapture model including covariates. *Int J Epidemiol* 2001; 30:1351-9.  
12  
13 935 28. Yee TW, Stoklosa J, Huggins RM. The VGAM Package for Capture-Recapture Data  
14  
15 936 Using the Conditional Likelihood. *Journal of Statistical Software*. 2015; Volume 65, Issue  
16  
17 937 5: 1-33. <http://www.jstatsoft.org/>  
18  
19 938 29. Maldonado G, Greenland S. Simulation study of confounder-selection strategies. *Am J*  
20  
21 939 *Epidemiol* 1993; 138:923-36.  
22  
23 940 30. LaPorte RE, Dearwater SR, Chang Y-F et al. Efficiency and accuracy of disease  
24  
25 941 monitoring systems: Applications of capture-recapture methods to injury monitoring. *Am*  
26  
27 942 *J Epidemiol* 1995; 142:1069-77.  
28  
29 943 31. -Andrianou XD, Riccardo F, Caporali MG, et al. Evaluation of the national surveillance  
30  
31 944 System for invasive meningococcal disease, Italy, 2015–2018. *PLoS ONE* 16(1):  
32  
33 945 e0244889.  
34  
35 946 32. Baldovin T, Lazzari R, Cocchio S et al. Invasive meningococcal disease in the Veneto  
36  
37 947 region of Italy: a capture-recapture analysis for assessing the effectiveness of an  
38  
39 948 integrated surveillance system. *BMJ Open* 2017; 7:e012478.  
40  
41 949 33. Jansson A, Arneborn M, Ekdahl K. Sensitivity of the Swedish statutory surveillance  
42  
43 950 system for communicable diseases 1998-2002, assessed by the capture-recapture  
44  
45 951 method. *Epidemiol Infect* 2005; 133:401-7.  
46  
47 952 34. Berghold C, Berghold A, Fülöp G, Heuberger S, Strauss R, Zenz W. Invasive  
48  
49 953 meningococcal disease in Austria 2002: assessment of completeness of notification by  
50  
51 954 comparison of two independent data sources. *Wien Klin Wochenschr* 2006; 118:31-5.  
52  
53 955 35. Gibson A, Jorm L, McIntyre P. Using linked birth, notification, hospital and mortality  
54  
55 956 data to examine false-positive meningococcal disease reporting and adjust disease  
56  
57  
58  
59  
60

## Meningococcal disease

- 1  
2  
3 957 incidence estimates for children in New South Wales, Australia. *Epidemiol Infect* 2015;  
4  
5 958 143:2570-9.  
6  
7 959 36. Vázquez J A, Taha M K, Findlow J, Gupta S, Borrow R. Global Meningococcal  
8  
9 960 initiative: guidelines for diagnosis and confirmation of invasive meningococcal disease.  
10  
11 961 *Epidemiol Infect* 2016; 144:3052-7.  
12  
13 962 37. Ratnayake R, Allard R. Challenges to the surveillance of meningococcal disease in an era  
14  
15 963 of declining incidence in Montréal, Quebec. *Can J Public Health* 2013; 104:e335–e339.  
16  
17 964 38. O'Lorcain P, Bennett DE, Morgan SL et al. A retrospective assessment of the  
18  
19 965 completeness and timeliness of meningococcal disease notifications in the Republic of  
20  
21 966 Ireland over a 16-year period, 1999-2015. *Public Health* 2018; 156:44-51.  
22  
23 967 39. Carmona G, Vilaró M, Ciruela P et al. Hepatitis A surveillance: sensitivity of two  
24  
25 968 information sources. *BMC Infect Dis* 2018; 18:633.  
26  
27 969 40. Gómez JA, Malbrán W, Vidal G, Seoane M, Giglio ND. Estimation of the real burden  
28  
29 970 of invasive meningococcal disease in Argentina. *Epidemiol Infect* 2019; 147: e311: 1-10.  
30  
31 971  
32  
33  
34  
35  
36 972  
37  
38  
39 973  
40  
41  
42 974  
43  
44  
45 975  
46  
47  
48 976  
49  
50  
51 977  
52  
53  
54 978  
55  
56 979  
57  
58 980  
59  
60

**Figure 1. Venn diagram of the capture–recapture analysis of two datasets to estimate the total number of invasive meningococcal disease cases, Catalonia 2011-2015**

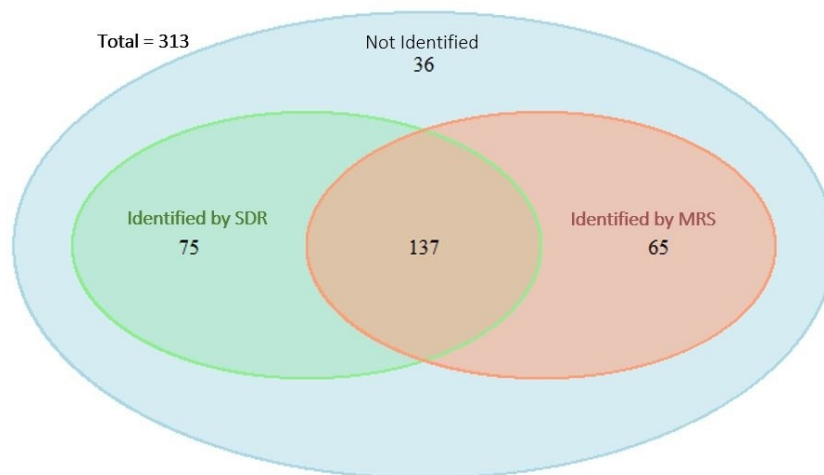

Venn diagram of the capture–recapture analysis of two datasets to estimate the total number of invasive meningococcal disease cases, Catalonia 2011-2015

189x117mm (144 x 144 DPI)

1  
2  
3  
4  
5  
6  
7  
8  
9  
10  
11  
12  
13  
14  
15  
16  
17  
18  
19  
20  
21  
22  
23  
24  
25  
26  
27  
28  
29  
30  
31  
32  
33  
34  
35  
36  
37  
38  
39  
40  
41  
42  
43  
44  
45  
46  
47  
48  
49  
50  
51  
52  
53  
54  
55  
56  
57  
58  
59  
60



Figure 2. Sensitivities of the SDR and MRS stratified by age groups. Catalonia 2011-2015

176x172mm (96 x 96 DPI)



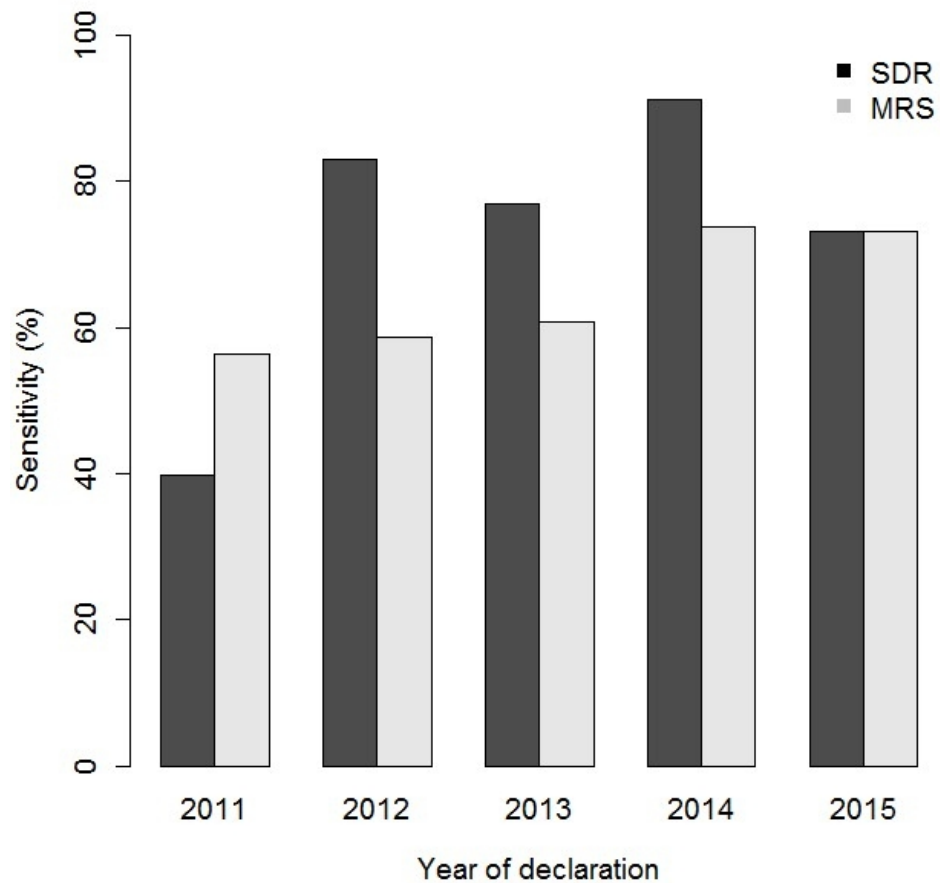

Figure 3. Sensitivities of the SDR and MRS stratified by year of reporting, Catalonia 2011-2015

172x172mm (96 x 96 DPI)

Supplementary table 1. Capture–recapture analysis of serogroup B meningococcal invasive disease reported to the SDR and MRS stratified by different characteristics, Catalonia 2011-2015

|                                | No. records in SDR | No. records in MRS | Matched records | Calculated unreported cases | Estimated total no. of cases (95% CI) | Sensitivity SDR (%) (95% CI) | Sensitivity MRS (%) (95% CI) | Difference in sensitivities (%) | p-value          |
|--------------------------------|--------------------|--------------------|-----------------|-----------------------------|---------------------------------------|------------------------------|------------------------------|---------------------------------|------------------|
| <b>All cases</b>               | 164                | 153                | 114             | 17                          | 220 (209, 232)                        | 74.6 (68.8, 80.3)            | 69.6 (63.5, 75.6)            | 5.0                             | <b>&lt;0.001</b> |
| <b>Age group</b>               |                    |                    |                 |                             |                                       |                              |                              |                                 |                  |
| <15 years                      | 110                | 110                | 78              | 13                          | 155 (146, 165)                        | 71.0 (63.8, 78.1)            | 71.0 (63.8, 78.1)            | 0.0                             | 0.656            |
| ≥15 years                      | 53                 | 42                 | 35              | 4                           | 64 (59, 69)                           | 83.5 (74.3, 92.6)            | 66.1 (54.5, 77.8)            | 17.3                            |                  |
| <b>Sex</b>                     |                    |                    |                 |                             |                                       |                              |                              |                                 |                  |
| Male                           | 86                 | 76                 | 62              | 6                           | 106 (100, 112)                        | 81.7 (74.3, 89.1)            | 72.2 (63.6, 80.7)            | 9.5                             | 0.099            |
| Female                         | 78                 | 77                 | 52              | 13                          | 116 (106, 126)                        | 67.7 (59.1, 76.2)            | 66.8 (58.2, 75.4)            | 0.9                             |                  |
| <b>Year of report</b>          |                    |                    |                 |                             |                                       |                              |                              |                                 |                  |
| 2011-2013                      | 95                 | 91                 | 60              | 18                          | 144 (132, 157)                        | 66.1 (58.3, 73.8)            | 63.3 (55.4, 71.2)            | 2.8                             | 0.002            |
| 2014-2015                      | 69                 | 62                 | 54              | 3                           | 80 (76, 83)                           | 87.1 (79.7, 94.5)            | 78.3 (69.2, 87.4)            | 8.8                             |                  |
| <b>Size of municipality</b>    |                    |                    |                 |                             |                                       |                              |                              |                                 |                  |
| <10,000 people                 | 22                 | 24                 | 20              | 1                           | 27 (26, 28)                           | 83.3 (69.1, 97.6)            | 90.9 (79.9, 100.0)           | -7.6                            | 0.059            |
| ≥10,000 people                 | 137                | 114                | 91              | 12                          | 172 (163, 181)                        | 79.9 (73.9, 85.9)            | 66.5 (59.4, 73.5)            | 13.4                            |                  |
| <b>Country of birth</b>        |                    |                    |                 |                             |                                       |                              |                              |                                 |                  |
| Spain                          | 152                | 144                | 107             | 16                          | 205 (194, 215)                        | 74.4 (68.4, 80.4)            | 70.4 (64.2, 76.7)            | 3.9                             | 0.631            |
| Other countries                | 12                 | 9                  | 7               | 2                           | 16 (13, 19)                           | 78.9 (58.4, 99.5)            | 59.2 (34.5, 83.9)            | 19.7                            |                  |
| <b>Number of hospital beds</b> |                    |                    |                 |                             |                                       |                              |                              |                                 |                  |
| <200                           | 49                 | 52                 | 33              | 9                           | 77 (69, 86)                           | 63.7 (53.0, 74.5)            | 67.6 (57.2, 78.1)            | -3.9                            | 0.095            |

|                                 |     |     |     |    |                |                   |                   |      |              |
|---------------------------------|-----|-----|-----|----|----------------|-------------------|-------------------|------|--------------|
| <b>&gt;=200</b>                 | 113 | 101 | 81  | 8  | 141 (134, 148) | 80.3 (73.7, 86.8) | 71.7 (64.3, 79.2) | 8.5  |              |
| <b>Clinical form</b>            |     |     |     |    |                |                   |                   |      |              |
| <b>Meningitis</b>               | 91  | 100 | 70  | 9  | 130 (122, 138) | 70.1 (62.2, 77.9) | 77.0 (69.7, 84.2) | -6.9 | <i>0.972</i> |
| <b>Septicaemia</b>              | 66  | 51  | 43  | 5  | 79 (73, 84)    | 84.4 (76.4, 92.4) | 65.2 (54.7, 75.8) | 19.2 |              |
| <b>Type of reporting centre</b> |     |     |     |    |                |                   |                   |      |              |
| <b>Private</b>                  | 14  | 1   | 1   | 0  | 14 (14, 14)    | 100 (100, 100)    | 7.1 (-6.4, 20.6)  | 92.9 | <i>0.004</i> |
| <b>Public</b>                   | 149 | 152 | 113 | 13 | 201 (192, 210) | 74.4 (68.4, 80.4) | 75.9 (70, 81.8)   | -1.5 |              |

SDR: Statutory disease reporting; MDR: Microbiological reporting system

Supplementary table 2. Capture–recapture analysis of serogroup C meningococcal invasive disease reported to the SDR and MRS stratified by different characteristics, Catalonia 2011-2015

|                                | No. records in SDR | No. records in MRS | Matched records | Calculated unreported cases | Estimated total no. of cases (95% CI) | Sensitivity SDR (%) (95% CI) | Sensitivity MRS (%) (95% CI) | Difference in sensitivities (%) | <i>p</i> -value |
|--------------------------------|--------------------|--------------------|-----------------|-----------------------------|---------------------------------------|------------------------------|------------------------------|---------------------------------|-----------------|
| <b>All cases</b>               | 26                 | 21                 | 16              | 3                           | 34 (30, 39)                           | 76.7 (62.5, 90.9)            | 62.0 (45.6, 78.3)            | 14.8                            | <b>0.035</b>    |
| <b>Age group</b>               |                    |                    |                 |                             |                                       |                              |                              |                                 |                 |
| <15 years                      | 4                  | 4                  | 4               | 0                           | 4 (4, 4)                              | 100.0 (100.0, 100.0)         | 100.0 (100.0, 100.0)         | 0.0                             | 0.992           |
| ≥15 years                      | 22                 | 17                 | 12              | 4                           | 31 (25, 37)                           | 71.4 (55.5, 87.4)            | 55.2 (37.6, 72.8)            | 16.2                            |                 |
| <b>Sex</b>                     |                    |                    |                 |                             |                                       |                              |                              |                                 |                 |
| Male                           | 13                 | 11                 | 7               | 3                           | 20 (15, 26)                           | 65.0 (44.1, 85.9)            | 55.0 (33.2, 76.8)            | 10.0                            | 0.368           |
| Female                         | 13                 | 10                 | 9               | 1                           | 15 (13, 16)                           | 90.3 (75.0, 100.0)           | 69.4 (45.7, 93.2)            | 20.8                            |                 |
| <b>Year of report</b>          |                    |                    |                 |                             |                                       |                              |                              |                                 |                 |
| 2011-2013                      | 12                 | 10                 | 6               | 4                           | 20 (14, 26)                           | 61.9 (40.2, 83.5)            | 51.6 (29.3, 73.8)            | 10.3                            | 0.110           |
| 2014-2015                      | 14                 | 11                 | 10              | 1                           | 16 (14, 17)                           | 90.9 (76.6, 100.0)           | 71.4 (48.9, 94.0)            | 19.5                            |                 |
| <b>Size of municipality</b>    |                    |                    |                 |                             |                                       |                              |                              |                                 |                 |
| <10,000 people                 | 3                  | 2                  | 2               | 0                           | 3 (3, 3)                              | 100.0 (100.0, 100.0)         | 66.7 (13.3, 100.0)           | 33.3                            | 0.591           |
| ≥10,000 people                 | 21                 | 15                 | 12              | 3                           | 27 (23, 30)                           | 80.5 (65.3, 95.7)            | 57.5 (38.5, 76.4)            | 23.0                            |                 |
| <b>Country of birth</b>        |                    |                    |                 |                             |                                       |                              |                              |                                 |                 |
| Spain                          | 22                 | 19                 | 14              | 3                           | 30 (26, 35)                           | 74.1 (58.3, 89.8)            | 64.0 (46.7, 81.2)            | 10.1                            | 0.945           |
| Other countries                | 4                  | 2                  | 2               | 0                           | 4 (4, 4)                              | 100.0 (100.0, 100.0)         | 50.0 (1.0, 99.0)             | 50.0                            |                 |
| <b>Number of hospital beds</b> |                    |                    |                 |                             |                                       |                              |                              |                                 |                 |

|                                 |    |    |    |   |             |                      |                    |      |              |
|---------------------------------|----|----|----|---|-------------|----------------------|--------------------|------|--------------|
| <b>&lt;200</b>                  | 7  | 5  | 5  | 0 | 7 (7, 7)    | 100.0 (100.0, 100.0) | 71.4 (38.0, 104.9) | 28.6 | <i>0.283</i> |
| <b>≥200</b>                     | 18 | 16 | 11 | 3 | 26 (22, 31) | 69.5 (51.8, 87.2)    | 61.8 (43.1, 80.5)  | 7.7  |              |
| <b>Clinical form</b>            |    |    |    |   |             |                      |                    |      |              |
| <b>Meningitis</b>               | 16 | 16 | 11 | 3 | 24 (20, 27) | 69.3 (50.4, 88.1)    | 69.3 (50.4, 88.1)  | 0.0  | <i>0.908</i> |
| <b>Septicaemia</b>              | 8  | 4  | 4  | 0 | 8 (8, 8)    | 100.0 (100.0, 100.0) | 50.0 (15.4, 84.7)  | 50.0 |              |
| <b>Type of reporting centre</b> |    |    |    |   |             |                      |                    |      |              |
| <b>Private</b>                  | 4  | 0  | 0  | 0 | 4 (4, 4)    | 100.0 (100.0, 100.0) | 0 (0.0, 0.0)       | 100  | <i>0.992</i> |
| <b>Public</b>                   | 22 | 21 | 16 | 2 | 29 (26, 33) | 76.4 (60.9, 91.9)    | 72.9 (56.7, 89.2)  | 3.5  |              |

SDR: Statutory disease reporting; MDR: Microbiological reporting system

Supplementary table 3. Capture–recapture analysis of all deaths due to meningococcal invasive disease reported to the SDR and MRS stratified by different characteristics, Catalonia 2011-2015

|                                | No. records in SDR | No. records in MRS | Matched records | Calculated unreported cases | Estimated total no. of cases (95% CI) | Sensitivity SDR (%) (95% CI) | Sensitivity MRS (%) (95% CI) | Difference in sensitivities (%) | p-value |
|--------------------------------|--------------------|--------------------|-----------------|-----------------------------|---------------------------------------|------------------------------|------------------------------|---------------------------------|---------|
| <b>All cases</b>               | 22                 | 11                 | 11              | 0                           | 22 (22, 22)                           | 100.0 (100.0, 100.0)         | 50.0 (29.1, 70.9)            | 50.0                            | 0.104   |
| <b>Age group</b>               |                    |                    |                 |                             |                                       |                              |                              |                                 |         |
| <15 years                      | 6                  | 4                  | 4               | 0                           | 6 (6, 6)                              | 100.0 (100.0, 100.0)         | 66.7 (28.9, 100.0)           | 33.3                            | 0.346   |
| ≥15 years                      | 16                 | 7                  | 7               | 0                           | 16 (16, 16)                           | 100.0 (100.0, 100.0)         | 43.8 (19.4, 68.1)            | 56.3                            |         |
| <b>Sex</b>                     |                    |                    |                 |                             |                                       |                              |                              |                                 |         |
| Male                           | 16                 | 7                  | 7               | 0                           | 16 (16, 16)                           | 100.0 (100.0, 100.0)         | 43.8 (19.4, 68.1)            | 56.2                            | 0.346   |
| Female                         | 6                  | 4                  | 4               | 0                           | 6 (6, 6)                              | 100.0 (100.0, 100.0)         | 66.7 (29.0, 100.0)           | 33.3                            |         |
| <b>Year of report</b>          |                    |                    |                 |                             |                                       |                              |                              |                                 |         |
| 2011-2013                      | 16                 | 6                  | 6               | 0                           | 16 (16, 16)                           | 100.0 (100.0, 100.0)         | 31.3 (8.5, 54.0)             | 68.8                            | 0.080   |
| 2014-2015                      | 6                  | 5                  | 5               | 0                           | 6 (6, 6)                              | 100.0 (100.0, 100.0)         | 83.3 (53.5, 100.0)           | 16.7                            |         |
| <b>Size of municipality</b>    |                    |                    |                 |                             |                                       |                              |                              |                                 |         |
| <10,000 people                 | 3                  | 3                  | 3               | 0                           | 3 (3, 3)                              | 100.0 (100.0, 100.0)         | 100.0 (100.0, 100.0)         | 0.0                             | 0.991   |
| ≥10,000 people                 | 19                 | 8                  | 8               | 0                           | 19 (19, 19)                           | 100.0 (100.0, 100.0)         | 42.1 (19.9, 64.3)            | 57.9                            |         |
| <b>Country of birth</b>        |                    |                    |                 |                             |                                       |                              |                              |                                 |         |
| Spain                          | 20                 | 10                 | 10              | 0                           | 20 (20, 20)                           | 100.0 (100.0, 100.0)         | 50.0 (28.1, 71.9)            | 50.0                            | 1.000   |
| Other countries                | 2                  | 1                  | 1               | 0                           | 2 (2, 2)                              | 100.0 (100.0, 100.0)         | 50.0 (0.0, 100.0)            | 50.0                            |         |
| <b>Number of hospital beds</b> |                    |                    |                 |                             |                                       |                              |                              |                                 |         |
| <200                           | 4                  | 2                  | 2               | 0                           | 4 (4, 4)                              | 100.0 (100.0, 100.0)         | 50.0 (1.0, 99.0)             | 50.0                            | 0.822   |
| ≥200                           | 16                 | 9                  | 9               | 0                           | 16 (16, 16)                           | 100.0 (100.0, 100.0)         | 56.3 (31.9, 80.6)            | 43.7                            |         |
| <b>Clinical form</b>           |                    |                    |                 |                             |                                       |                              |                              |                                 |         |
| Meningitis                     | 7                  | 4                  | 4               | 0                           | 7 (7, 7)                              | 100.0 (100.0, 100.0)         | 57.1 (20.5, 93.8)            | 42.9                            | 0.648   |
| Septicaemia                    | 15                 | 7                  | 7               | 0                           | 15 (15, 15)                           | 100.0 (100.0, 100.0)         | 46.7 (21.4, 71.9)            | 53.3                            |         |

|                                 |    |    |    |   |             |                      |                   |      |       |
|---------------------------------|----|----|----|---|-------------|----------------------|-------------------|------|-------|
| <b>Type of reporting centre</b> |    |    |    |   |             |                      |                   |      |       |
| <b>Private</b>                  | 2  | 0  | 0  | 0 | 2 (2, 2)    | 100.0 (100.0, 100.0) | 0 (0.0, 0.0)      | 100  | 0.992 |
| <b>Public</b>                   | 20 | 11 | 11 | 0 | 20 (20, 20) | 100.0 (100.0, 100.0) | 55 (33.2, 76.8)   | 45   |       |
| <b>Serogrup</b>                 |    |    |    |   |             |                      |                   |      |       |
| <b>B</b>                        | 17 | 9  | 9  | 0 | 17 (17, 17) | 100.0 (100.0, 100.0) | 52.9 (29.2, 76.7) | 47.1 | 0.332 |
| <b>C</b>                        | 4  | 1  | 1  | 0 | 4 (4, 4)    | 100.0 (100.0, 100.0) | 25.0 (0.0, 67.4)  | 75.0 |       |

SDR: Statutory disease reporting; MDR: Microbiological reporting system

## STROBE Statement—checklist of items that should be included in reports of observational studies

|                              | Item No | Recommendation                                                                                                                                                                                                                                                                                                                                                                                                                                                         | Page No |
|------------------------------|---------|------------------------------------------------------------------------------------------------------------------------------------------------------------------------------------------------------------------------------------------------------------------------------------------------------------------------------------------------------------------------------------------------------------------------------------------------------------------------|---------|
| <b>Title and abstract</b>    | 1       | (a) Indicate the study's design with a commonly used term in the title or the abstract                                                                                                                                                                                                                                                                                                                                                                                 | 1       |
|                              |         | (b) Provide in the abstract an informative and balanced summary of what was done and what was found                                                                                                                                                                                                                                                                                                                                                                    | 5       |
| <b>Introduction</b>          |         |                                                                                                                                                                                                                                                                                                                                                                                                                                                                        |         |
| Background/rationale         | 2       | Explain the scientific background and rationale for the investigation being reported                                                                                                                                                                                                                                                                                                                                                                                   | 6       |
| Objectives                   | 3       | State specific objectives, including any prespecified hypotheses                                                                                                                                                                                                                                                                                                                                                                                                       | 7       |
| <b>Methods</b>               |         |                                                                                                                                                                                                                                                                                                                                                                                                                                                                        |         |
| Study design                 | 4       | Present key elements of study design early in the paper                                                                                                                                                                                                                                                                                                                                                                                                                | 7       |
| Setting                      | 5       | Describe the setting, locations, and relevant dates, including periods of recruitment, exposure, follow-up, and data collection                                                                                                                                                                                                                                                                                                                                        | 7,8     |
| Participants                 | 6       | (a) <i>Cohort study</i> —Give the eligibility criteria, and the sources and methods of selection of participants. Describe methods of follow-up<br><i>Case-control study</i> —Give the eligibility criteria, and the sources and methods of case ascertainment and control selection. Give the rationale for the choice of cases and controls<br><i>Cross-sectional study</i> —Give the eligibility criteria, and the sources and methods of selection of participants | 7,8     |
|                              |         | (b) <i>Cohort study</i> —For matched studies, give matching criteria and number of exposed and unexposed<br><i>Case-control study</i> —For matched studies, give matching criteria and the number of controls per case                                                                                                                                                                                                                                                 |         |
| Variables                    | 7       | Clearly define all outcomes, exposures, predictors, potential confounders, and effect modifiers. Give diagnostic criteria, if applicable                                                                                                                                                                                                                                                                                                                               | 8,9     |
| Data sources/<br>measurement | 8*      | For each variable of interest, give sources of data and details of methods of assessment (measurement). Describe comparability of assessment methods if there is more than one group                                                                                                                                                                                                                                                                                   | 8,9     |
| Bias                         | 9       | Describe any efforts to address potential sources of bias                                                                                                                                                                                                                                                                                                                                                                                                              | 9       |
| Study size                   | 10      | Explain how the study size was arrived at                                                                                                                                                                                                                                                                                                                                                                                                                              | 8       |
| Quantitative<br>variables    | 11      | Explain how quantitative variables were handled in the analyses. If applicable, describe which groupings were chosen and why                                                                                                                                                                                                                                                                                                                                           | 8       |
| Statistical methods          | 12      | (a) Describe all statistical methods, including those used to control for confounding                                                                                                                                                                                                                                                                                                                                                                                  | 8,9     |
|                              |         | (b) Describe any methods used to examine subgroups and interactions                                                                                                                                                                                                                                                                                                                                                                                                    |         |
|                              |         | (c) Explain how missing data were addressed                                                                                                                                                                                                                                                                                                                                                                                                                            |         |
|                              |         | (d) <i>Cohort study</i> —If applicable, explain how loss to follow-up was addressed<br><i>Case-control study</i> —If applicable, explain how matching of cases and controls was addressed<br><i>Cross-sectional study</i> —If applicable, describe analytical methods taking account of sampling strategy                                                                                                                                                              |         |
|                              |         | (e) Describe any sensitivity analyses                                                                                                                                                                                                                                                                                                                                                                                                                                  |         |

Continued on next page



| <b>Results</b>           |     |                                                                                                                                                                                                                                                                                                                                                                                                               |          |
|--------------------------|-----|---------------------------------------------------------------------------------------------------------------------------------------------------------------------------------------------------------------------------------------------------------------------------------------------------------------------------------------------------------------------------------------------------------------|----------|
| Participants             | 13* | (a) Report numbers of individuals at each stage of study—eg numbers potentially eligible, examined for eligibility, confirmed eligible, included in the study, completing follow-up, and analysed<br>(b) Give reasons for non-participation at each stage<br>(c) Consider use of a flow diagram                                                                                                               | 10       |
| Descriptive data         | 14* | (a) Give characteristics of study participants (eg demographic, clinical, social) and information on exposures and potential confounders<br>(b) Indicate number of participants with missing data for each variable of interest<br>(c) <i>Cohort study</i> —Summarise follow-up time (eg, average and total amount)                                                                                           | 10       |
| Outcome data             | 15* | <i>Cohort study</i> —Report numbers of outcome events or summary measures over time<br><i>Case-control study</i> —Report numbers in each exposure category, or summary measures of exposure<br><i>Cross-sectional study</i> —Report numbers of outcome events or summary measures                                                                                                                             | 10       |
| Main results             | 16  | (a) Give unadjusted estimates and, if applicable, confounder-adjusted estimates and their precision (eg, 95% confidence interval). Make clear which confounders were adjusted for and why they were included<br>(b) Report category boundaries when continuous variables were categorized<br>(c) If relevant, consider translating estimates of relative risk into absolute risk for a meaningful time period | 10,11,12 |
| Other analyses           | 17  | Report other analyses done—eg analyses of subgroups and interactions, and sensitivity analyses                                                                                                                                                                                                                                                                                                                |          |
| <b>Discussion</b>        |     |                                                                                                                                                                                                                                                                                                                                                                                                               |          |
| Key results              | 18  | Summarise key results with reference to study objectives                                                                                                                                                                                                                                                                                                                                                      | 12,13    |
| Limitations              | 19  | Discuss limitations of the study, taking into account sources of potential bias or imprecision. Discuss both direction and magnitude of any potential bias                                                                                                                                                                                                                                                    | 15       |
| Interpretation           | 20  | Give a cautious overall interpretation of results considering objectives, limitations, multiplicity of analyses, results from similar studies, and other relevant evidence                                                                                                                                                                                                                                    | 14       |
| Generalisability         | 21  | Discuss the generalisability (external validity) of the study results                                                                                                                                                                                                                                                                                                                                         | 5,14,15  |
| <b>Other information</b> |     |                                                                                                                                                                                                                                                                                                                                                                                                               |          |
| Funding                  | 22  | Give the source of funding and the role of the funders for the present study and, if applicable, for the original study on which the present article is based                                                                                                                                                                                                                                                 | 16       |

\*Give information separately for cases and controls in case-control studies and, if applicable, for exposed and unexposed groups in cohort and cross-sectional studies.

**Note:** An Explanation and Elaboration article discusses each checklist item and gives methodological background and published examples of transparent reporting. The STROBE checklist is best used in conjunction with this article (freely available on the Web sites of PLoS Medicine at <http://www.plosmedicine.org/>, Annals of Internal Medicine at <http://www.annals.org/>, and Epidemiology at <http://www.epidem.com/>). Information on the STROBE Initiative is available at [www.strobe-statement.org](http://www.strobe-statement.org).

# BMJ Open

## Estimation of the incidence of invasive meningococcal disease using a capture-recapture model based on two independent surveillance systems, in Catalonia, Spain

|                                 |                                                                                                                                                                                                                                                                                                                                                                                                                                                                                                                                                                                                                           |
|---------------------------------|---------------------------------------------------------------------------------------------------------------------------------------------------------------------------------------------------------------------------------------------------------------------------------------------------------------------------------------------------------------------------------------------------------------------------------------------------------------------------------------------------------------------------------------------------------------------------------------------------------------------------|
| Journal:                        | <i>BMJ Open</i>                                                                                                                                                                                                                                                                                                                                                                                                                                                                                                                                                                                                           |
| Manuscript ID                   | bmjopen-2021-058003.R2                                                                                                                                                                                                                                                                                                                                                                                                                                                                                                                                                                                                    |
| Article Type:                   | Original research                                                                                                                                                                                                                                                                                                                                                                                                                                                                                                                                                                                                         |
| Date Submitted by the Author:   | 16-May-2022                                                                                                                                                                                                                                                                                                                                                                                                                                                                                                                                                                                                               |
| Complete List of Authors:       | Ciruela, Pilar; Public Health Agency of Catalonia; CIBERESP<br>Vilaró, Marta; Universitat de Barcelona, Departament de Medicina; CIBERESP, Epidemiology and Public Health<br>Carmona, Gloria; Public Health Agency of Catalonia<br>Jané, Mireia; Public Health Agency of Catalonia, Public Health Surveillance<br>Soldevila, Núria; CIBERESP; Universitat de Barcelona, Departament de Medicina<br>Garcia, Tomás; Generalitat de Catalunya<br>Hernández, Sergi; Generalitat de Catalunya<br>Ruiz, Laura; Generalitat de Catalunya<br>Dominguez, Angela; CIBERESP, Epidemiologia y Salud Publica; Universitat de Barcelona |
| <b>Primary Subject Heading</b>: | Epidemiology                                                                                                                                                                                                                                                                                                                                                                                                                                                                                                                                                                                                              |
| Secondary Subject Heading:      | Infectious diseases, Public health                                                                                                                                                                                                                                                                                                                                                                                                                                                                                                                                                                                        |
| Keywords:                       | Diagnostic microbiology < INFECTIOUS DISEASES, Epidemiology < INFECTIOUS DISEASES, Molecular diagnostics < INFECTIOUS DISEASES, Infection control < INFECTIOUS DISEASES                                                                                                                                                                                                                                                                                                                                                                                                                                                   |
|                                 |                                                                                                                                                                                                                                                                                                                                                                                                                                                                                                                                                                                                                           |

SCHOLARONE™  
Manuscripts



I, the Submitting Author has the right to grant and does grant on behalf of all authors of the Work (as defined in the below author licence), an exclusive licence and/or a non-exclusive licence for contributions from authors who are: i) UK Crown employees; ii) where BMJ has agreed a CC-BY licence shall apply, and/or iii) in accordance with the terms applicable for US Federal Government officers or employees acting as part of their official duties; on a worldwide, perpetual, irrevocable, royalty-free basis to BMJ Publishing Group Ltd ("BMJ") its licensees and where the relevant Journal is co-owned by BMJ to the co-owners of the Journal, to publish the Work in this journal and any other BMJ products and to exploit all rights, as set out in our [licence](#).

The Submitting Author accepts and understands that any supply made under these terms is made by BMJ to the Submitting Author unless you are acting as an employee on behalf of your employer or a postgraduate student of an affiliated institution which is paying any applicable article publishing charge ("APC") for Open Access articles. Where the Submitting Author wishes to make the Work available on an Open Access basis (and intends to pay the relevant APC), the terms of reuse of such Open Access shall be governed by a Creative Commons licence – details of these licences and which [Creative Commons](#) licence will apply to this Work are set out in our licence referred to above.

Other than as permitted in any relevant BMJ Author's Self Archiving Policies, I confirm this Work has not been accepted for publication elsewhere, is not being considered for publication elsewhere and does not duplicate material already published. I confirm all authors consent to publication of this Work and authorise the granting of this licence.

1  
2  
3 1 **Estimation of the incidence of invasive meningococcal disease using a capture-recapture**  
4 **model based on two independent surveillance systems, in Catalonia, Spain**  
5  
6  
7

8 3  
9  
10 4 Pilar Ciruela,<sup>1,2\*</sup> Marta Vilaró,<sup>2,3</sup> Gloria Carmona,<sup>1</sup> Mireia Jané,<sup>1,2,3</sup> Núria Soldevila,<sup>2,3</sup> Tomás  
11  
12 5 Garcia,<sup>1</sup> Sergi Hernández,<sup>1</sup> Laura Ruiz,<sup>1</sup> Angela Domínguez,<sup>2,3</sup> Working Group of the  
13  
14 6 Microbiological Reporting System of Catalonia and Working Group of the Epidemiological  
15  
16 7 Surveillance Network of Catalonia  
17  
18  
19 8

20  
21 9 <sup>1</sup> Public Health Agency of Catalonia (ASPCAT), Barcelona, Spain

22  
23 10 <sup>2</sup> CIBER Epidemiología y Salud Pública (CIBERESP), Madrid, Spain

24  
25 11 <sup>3</sup> Departament de Medicina, Universitat de Barcelona  
26  
27 12

28  
29 13

30  
31 14

32  
33 15

34  
35 16

36 16 **Corresponding author:**

37 17 Pilar Ciruela

38  
39 18 [pilar.ciruela@gencat.cat](mailto:pilar.ciruela@gencat.cat)

40  
41 19 Roc Boronat, 81-95

42  
43 20 08005 Barcelona, Spain

44  
45 21 Phone: +34935513680  
46  
47 22

48  
49 23

50  
51 24

52  
53 25

54  
55 26

56  
57 27

58  
59 27  
60

1  
2  
3 28 Pilar Ciruela<sup>1,2</sup>  
4  
5 29 <sup>1</sup> Agència de Salut Pública de Catalunya, Generalitat de Catalunya  
6  
7 30 C/ Roc Boronat, 81-95  
8  
9 31 08005 Barcelona, Spain  
10  
11 32 <sup>2</sup> CIBER de Epidemiología y Salud Pública (CIBERESP)  
12  
13 33 Instituto de Salud Carlos III  
14  
15 34 C/ Monforte de Lemos, 3-5  
16  
17 35 28029 Madrid, Spain  
18  
19 36 [pilar.ciruela@gencat.cat](mailto:pilar.ciruela@gencat.cat)  
20  
21  
22 37  
23  
24 38  
25  
26 39 Marta Vilaró<sup>2,3</sup>  
27  
28 40 <sup>2</sup>Departament de Medicina, Universitat de Barcelona  
29  
30 41 C/ Casanova, 143  
31  
32 42 08036 Barcelona, Spain  
33  
34 43 <sup>3</sup>CIBER de Epidemiología y Salud Pública (CIBERESP)  
35  
36 44 Instituto de Salud Carlos III  
37  
38 45 C/ Monforte de Lemos, 3-5  
39  
40 46 28029 Madrid, Spain  
41  
42 47 [marta.vilarpa@gmail.com](mailto:marta.vilarpa@gmail.com)  
43  
44  
45 48  
46  
47 49 Gloria Carmona  
48  
49 50 Agència de Salut Pública de Catalunya, Generalitat de Catalunya  
50  
51 51 C/ Roc Boronat, 81-95  
52  
53 52 08005 Barcelona, Spain  
54  
55 53 [gloria.carmona@gencat.cat](mailto:gloria.carmona@gencat.cat)  
56  
57  
58 54  
59  
60 55

1  
2  
3 56 Mireia Jané<sup>1,2</sup>  
4  
5 57 <sup>1</sup> Agència de Salut Pública de Catalunya, Generalitat de Catalunya  
6  
7 58 C/ Roc Boronat, 81-95  
8  
9 59 08005 Barcelona, Spain  
10  
11 60 <sup>2</sup> CIBER de Epidemiología y Salud Pública (CIBERESP)  
12  
13 61 Instituto de Salud Carlos III  
14  
15 62 C/ Monforte de Lemos, 3-5  
16  
17 63 28029 Madrid, Spain  
18  
19 64 [mireia.jane@gencat.cat](mailto:mireia.jane@gencat.cat)  
20  
21  
22 65  
23  
24 66 Núria Soldevila<sup>2,3</sup>  
25  
26 67 <sup>2</sup> Departament de Medicina, Universitat de Barcelona  
27  
28 68 C/ Casanova, 143  
29  
30 69 08036 Barcelona, Spain  
31  
32 70 <sup>3</sup> CIBER de Epidemiología y Salud Pública (CIBERESP)  
33  
34 71 Instituto de Salud Carlos III  
35  
36 72 C/ Monforte de Lemos, 3-5  
37  
38 73 28029 Madrid, Spain  
39  
40 74 [nsoldevila@ub.edu](mailto:nsoldevila@ub.edu)  
41  
42  
43 75  
44  
45 76 Tomás Garcia  
46  
47 77 Agència de Salut Pública de Catalunya, Generalitat de Catalunya  
48  
49 78 C/ Roc Boronat, 81-95  
50  
51 79 08005 Barcelona, Spain  
52  
53 80 [tgarala@alumnes.ub.edu](mailto:tgarala@alumnes.ub.edu)  
54  
55  
56 81  
57  
58 82 Sergi Hernández  
59  
60 83 Agència de Salut Pública de Catalunya, Generalitat de Catalunya

1  
2  
3 84 C/ Roc Boronat, 81-95  
4  
5 85 08005 Barcelona, Spain  
6  
7 86 [snmc@gencat.cat](mailto:snmc@gencat.cat)  
8  
9 87  
10  
11 88 Laura Ruiz  
12  
13 89 Agència de Salut Pública de Catalunya, Generalitat de Catalunya  
14  
15 90 C/ Roc Boronat, 81-95  
16  
17 91 08005 Barcelona, Spain  
18  
19 92 [laura.ruiz\\_ext@gencat.cat](mailto:laura.ruiz_ext@gencat.cat)  
20  
21  
22 93  
23  
24 94 Angela Domínguez<sup>2,3</sup>  
25  
26 95 <sup>2</sup>Departament de Medicina, Universitat de Barcelona  
27  
28 96 C/ Casanova, 143  
29  
30 97 08036 Barcelona, Spain  
31  
32 98 <sup>3</sup>CIBER de Epidemiología y Salud Pública (CIBERESP)  
33  
34 99 Instituto de Salud Carlos III  
35  
36 100 C/ Monforte de Lemos, 3-5  
37  
38 101 28029 Madrid, Spain  
39  
40 102 [angela.dominguez@ub.edu](mailto:angela.dominguez@ub.edu)  
41  
42  
43 103  
44  
45 104  
46  
47 105  
48  
49 106  
50  
51 107  
52  
53 108  
54  
55 109  
56  
57 110  
58  
59 111  
60

1  
2  
3 112 **ABSTRACT**  
4

5 113 **Objectives:** Invasive meningococcal disease (IMD) is an urgent notifiable disease and its early  
6  
7 114 notification is essential to prevent cases. The objective of the study was to assess the sensitivity  
8  
9 115 of two independent surveillance systems, and to estimate the incidence of IMD.  
10

11 116 **Design:** We used capture-recapture model based on two independent surveillance systems, the  
12  
13 117 statutory disease reporting system (SDR) and the microbiological reporting system (MRS) of  
14  
15 118 the Public Health Agency of Catalonia, between 2011 and 2015. The capture-recapture analysis  
16  
17 119 and 95% confidence intervals were calculated using the Chapman formula. Multivariate vector  
18  
19 120 generalized linear model was performed for adjusted estimation.  
20  
21

22 121 **Measures:** The variables collected were age, sex, year of report, size of municipality (< 10,000  
23  
24 122 and  $\geq 10,000$ ), clinical form, death, serogroup, country of birth and type of reporting centre  
25  
26 123 (private and public).  
27

28 124 **Results:** The sensitivity of the two combined surveillance systems was 88.5% (85.0-92.0). SDR  
29  
30 125 had greater sensitivity than the MRS (67.9%; 62.7-73.1 vs. 64.7%; 59.4-70.0). In 2014-2015,  
31  
32 126 the sensitivity of both systems was higher (80.6%; 73.2-87.9 vs. 73.4%; 65.2-81.6) than in  
33  
34 127 2011-2013 (59.3%; 52.6-66.0 vs. 58.3%; 51.6-65.1). In private centres, the sensitivity was  
35  
36 128 higher for SDR than for MRS (100%; 100-100 vs. 4.8%; -4.4-13.9). The adjusted estimate of  
37  
38 129 IMD cases was lower than that obtained using the Chapman formula (279; 266-296 vs. 313;  
39  
40 130 295-330). The estimated adjusted incidence of IMD was 0.7/100,000 persons-year.  
41  
42

43 131 **Conclusions:** The sensitivity of enhanced surveillance through the combination of two  
44  
45 132 complementary sources was higher than for the sources individually. Factors associated with  
46  
47 133 under-reporting in different systems should be analysed to improve IMD surveillance.  
48

49 134

50  
51 135 **Keywords:**

52  
53 136 Meningococcal disease, Capture-recapture, estimated incidence, surveillance systems.  
54  
55

56 137

57  
58 138 **Strengths and limitations of this study**  
59

60 139



- 1  
2  
3 140 • The use of two surveillance sources as universal statutory disease reporting (SDR) system  
4  
5 141 based on passive reporting and sentinel microbiological reporting system (MRS) covering  
6  
7 142 83% of acute hospital beds, offer a wide coverage.  
8  
9 143 • The independence of the two sources was demonstrated by complying with the premise of  
10  
11 144 the capture-recapture method.  
12  
13 145 • Not all centres participate in the MRS, thus not all cases diagnosed had the same probability  
14  
15 146 of being selected from a given source.  
16  
17 147 • The role of the automated electronic reporting of data that might be associated to a greater  
18  
19 148 sensitivity was not analysed.  
20  
21  
22  
23 149

## 25 **BACKGROUND**

26  
27 151 Invasive meningococcal disease (IMD) continues to be an important cause of morbidity and  
28  
29 152 mortality, mainly in children aged < 4 years and adolescents. [1]  
30  
31 153 In the European regions, the incidence rate of confirmed IMD cases was 0.62/100,000 persons-  
32  
33 154 year in 2018, [2] and in Spain it was 0.86/100,000 persons. [3] Six serogroups (A, B, C, W, X,  
34  
35 155 Y) currently cause almost all cases of this life-threatening disease worldwide. Case fatality rate  
36  
37 156 is about 10% in developed countries [4-6], and 40-65% present with meningitis, but  
38  
39 157 meningococemia and pneumonia are also frequent [4], being the serogroup involved related  
40  
41 158 both with the case fatality rate [7] and the predominant clinical form. [8] Serogroup B causes  
42  
43 159 more than a third part of IMD [4,9] but in some countries or population groups the proportion is  
44  
45 160 even higher. [10,11] In Spain, from 2009 to 2018, serogroup B accounted for 64% of IMD  
46  
47 161 cases. [12] A high proportion, up to 60% [13] of IMD cases, are affected by a range of sequelae  
48  
49 162 and health related impairment in the quality of life of survivors and their families. [14]  
50  
51 163 IMD is an urgent notifiable disease and its early notification is essential to provide an adequate  
52  
53 164 public health response in patients and their close contacts to prevent further cases.  
54  
55 165 Epidemiological surveillance allows monitoring of the impact of public health interventions,  
56  
57 166 including vaccination programmes. Therefore, a robust epidemiological and microbiological  
58  
59  
60

1  
2  
3 167 system with timely and accurate surveillance providing information on the frequency of cases  
4  
5 168 and the distribution of circulating serogroups is crucial.

6  
7 169 Evaluations of surveillance systems should be conducted regularly to increase their utility. [15-  
8  
9 170 17] There are two reporting systems for the epidemiological surveillance of communicable  
10  
11 171 disease in Catalonia: the statutory disease reporting system (SDR) and the microbiological  
12  
13 172 reporting system (MRS). [18]

14  
15 173 The capture-recapture method is a statistical method for estimating the real incidence of  
16  
17 174 diseases in a population with two or more information sources. [19, 20] The method is valid if  
18  
19 175 four conditions are met: 1) the population under study has to be closed, i.e., there should be no  
20  
21 176 changes during the study period; 2) there must be a method of determining whether an  
22  
23 177 individual identified by one source is the same as an individual identified by the other; 3) each  
24  
25 178 individual must have the same probability of being captured by either system; 4) the systems  
26  
27 179 must be independent.

28  
29  
30 180 The aim of this study was to assess the sensitivity of the two surveillance systems in Catalonia  
31  
32 181 (SDR and MRS) using the capture-recapture method and to estimate the incidence of IMD.

33  
34 182

## 35 36 183 **METHODS**

### 37 38 184 **Information sources**

39  
40 185 Catalonia is a region in the northeast of Spain with a population of 7,508,106 in 2015. [21]

41  
42 186 The SDR is a passive surveillance system through which health professionals report all  
43  
44 187 infectious diseases subject to surveillance. The reporting of cases to the Public Health Agency  
45  
46 188 of Catalonia (PHAC) is mandatory and includes confirmed cases of IMD and is regulated by a  
47  
48 189 Decree. [18, 22]

49  
50  
51 190 The MRS is a surveillance system that consists of microbiologists notifying laboratory  
52  
53 191 confirmed microorganisms that cause infectious diseases. The main objectives of the MRS are  
54  
55 192 to confirm suspected cases of infectious diseases through the identification of the  
56  
57 193 microorganisms and serogroups involved and to determine trends and changes in  
58  
59 194 epidemiological patterns and microbiological resistance. [23]

1  
2  
3 195 The MRS was non-compulsory until 2015 and involved 50 health care centres representing over  
4  
5 196 83% of acute hospital beds. [24] Confirmed IMD cases were reported by microbiologists  
6  
7 197 including sex, age, clinical presentation (meningitis, bacteraemia of unknown focus and other  
8  
9 198 clinical presentations), serogroup and diagnostic method.  
10  
11 199 Both systems belong to the PHAC epidemiological surveillance network and, since 2014,  
12  
13 200 transfer information automatically, but the independence of the sources is maintained.  
14  
15  
16 201

### 17 18 202 **Cases definition, inclusion, and exclusion criteria**

19  
20 203 A confirmed case of IMD was defined as laboratory confirmed if at least one of the following  
21  
22 204 criteria was fulfilled: isolation in cultures or detection of *Neisseria meningitidis* DNA by PCR  
23  
24 205 in a normally sterile site, detection of gram-negative diplococci or *N. meningitidis* antigen in  
25  
26 206 cerebrospinal fluid.  
27  
28 207

### 29 30 208 **Data collection**

31  
32 209 We made a retrospective study of confirmed IMD cases in Catalonia from January 2011 to  
33  
34 210 December 2015. We extracted all IMD records from the MRS and SDR and linked the  
35  
36 211 databases using the personal identification code (PIC). When the PIC was not available, data on  
37  
38 212 notification, age and sex were used to identify duplicates between the two sources. In cases with  
39  
40 213 inconclusive matching, the hospital was used as a fifth matching criterion.  
41  
42 214 Estimates were made for the entire 5-year period and by age, sex, year of report, size of  
43  
44 215 municipality (<10,000 and  $\geq$ 10,000), country of birth, number of hospital beds, clinical form  
45  
46 216 (meningitis, with or without sepsis, sepsis, and others), serogroup, death and reporting centre  
47  
48 217 (private or public).  
49  
50 218

### 51 52 219 **Ethics statement**

53  
54 220 The study was not submitted for research ethics approval as the activities described were  
55  
56 221 conducted as part of the legislated mandate of the Health Department of Catalonia, the  
57  
58 222 competent authority for surveillance of communicable diseases according to Decree 203/2015  
59  
60

1  
2  
3 223 of the 15 September which created the epidemiological surveillance network of Catalonia. [18]  
4  
5 224 All the study activities formed part of public health surveillance and did not require informed  
6  
7 225 consent. Personal data were used only for the matching process and measures to protect the  
8  
9 226 confidentiality of personal data were applied (access to the data restricted to the personnel  
10  
11 227 involved in data analysis, and removal of personal data from the datasets after matching).  
12  
13  
14 228

### 15 229 *Patient and public involvement*

16  
17  
18 230 No patient involved  
19  
20 231

### 21 232 *Statistical methods*

22  
23  
24 233 The total number of IMD cases was estimated using the two-source capture-recapture method,  
25  
26 234 which uses Chapman's formula, [25] developed to reduce bias due to small samples:

$$27$$

$$28$$

$$29 \quad N = \frac{(L1 + 1)(L2 + 1)}{a + 1} - 1$$

$$30$$

$$31$$

$$32 \quad 95\%CI = N \pm 1.96 \sqrt{\frac{(L1 + 1)(L2 + 1)(L1 - a)(L2 - a)}{(a + 1)^2(a + 2)}}$$

$$33$$

$$34$$

35 237  
36  
37 238 where L1 is the number of cases in the SDR dataset, L2 is the number of cases reported to MRS,  
38  
39 239 and **a** is the number of cases captured by both systems. The sensitivity (Se) of case  
40  
41 240 ascertainment by the two sources was also calculated as the proportion of true cases detected by  
42  
43 241 each source, i.e. Se (1) =L1/N for source 1 and Se (2) =L2/N for source 2. The sensitivity of  
44  
45 242 both sources combined was calculated as the proportion of cases detected by one of the two  
46  
47 243 sources or both, i.e., Se (1, 2) =(L1+L2-a)/N.

48  
49 244 The independence of the sources was considered when applying the capture-recapture method.  
50  
51 245 [26, 27] In the two-by-two table, where **a** represents cases reported by two sources or  
52  
53 246 combinations of sources, **b** and **c** cases reported exclusively by either of the two sources and **x**  
54  
55 247 the estimated non-reported cases by either of the sources, the odds ratio (OR = ax/bc) should not  
56  
57 248 differ from one.  
58  
59  
60

1  
2  
3 249 As a multivariate model, a vector generalized linear model (VGLM) from the generalized  
4  
5 250 additive model (GAM) framework [28] was used to evaluate patient characteristics and the  
6  
7 251 probability of capture by the different sources taking into account the covariates: age (<15 vs  
8  
9 252  $\geq 15$ ), gender, year of notification (2011-2013 vs 2014-2015), size of the municipality (<10,000  
10  
11 253 vs  $\geq 10,000$ ), country of birth (Spain vs other), number of hospital beds (<200 vs  $\geq 200$ ) and  
12  
13 254 diagnosis (meningitis vs septicæmia). The outcome for the model is a two column matrix with  
14  
15 255 0 and 1 indicating if the record is identified by SDR or MRS. We used a backwards stepwise  
16  
17 256 procedure (using likelihood ratio tests, with a p-value  $> 0.2$  as the criterion for removing  
18  
19 257 variables from the model) [29, 30] to eliminate covariates, starting with a full model including  
20  
21 258 all described covariates, and we used the parameter estimates from the model to estimate the  
22  
23 259 sizes of population subgroups and calculate incidence rates. The 95% confidence intervals (CI)  
24  
25 260 were calculated, allowing for uncertainty in the total number of cases estimated. For each of the  
26  
27 261 described covariates, VLGGM with source notification as outcome was used to test differences in  
28  
29 262 sensitivities. All analyses were made using R software version 3.0.1.  
30  
31  
32  
33

## 34 264 **RESULTS**

### 35 265 **Patient characteristics**

36  
37  
38 266 Patient characteristics by source are shown in Table 1. From 2011 to 2015, 212 IMD cases were  
39  
40 267 reported to the SDR and 202 cases to the MRS, representing an incidence of 0.56 and 0.54  
41  
42 268 /100,000 persons-year, respectively. IMD due to serogroup B was the most-frequently reported  
43  
44 269 serogroup (77.4% and 75.7% in the SDR and MRS, respectively). Around 63% of patients were  
45  
46 270 aged < 15 years; the mean age was 21.4 for the SDR and 20.5 years for the MRS. Male sex was  
47  
48 271 more frequent in the SDR (52.4%) than in the MRS (49%). The SDR presented the most cases  
49  
50 272 in 2015 (48 cases; 22.6%) and the MRS (61 cases; 30.2%) in 2011. The SDR reported that 84%  
51  
52 273 of patients lived in a municipality of  $\geq 10,000$  people compared with 73% in the MRS. In both  
53  
54 274 sources, the number of cases declared in a hospital of  $\geq 200$  beds were around 70%. The main  
55  
56 275 clinical form in both sources was meningitis (54.7% and 64.8%, respectively) and sepsis (38.7%  
57  
58 276 and 32.7%, respectively). Reports from private centres represented 10% of cases in the SDR and  
59  
60

277 0.5% in the MRS. Twenty-two cases (10.4%) cases reported by the SDR died compared with 11  
 278 cases (5.4%) reported by the MRS.

279

280 **Table 1. Sociodemographic, clinical and microbiological characteristics of invasive**  
 281 **meningococcal disease cases reported to the SDR and MRS, Catalonia 2011-2015**

|                                       | SDR (n=212) | MRS (n=202) |
|---------------------------------------|-------------|-------------|
| <b>Age groups</b>                     |             |             |
| Mean (SD)                             | 21.4 (27.9) | 20.5 (26.7) |
| Median (IQR)                          | 6 (36)      | 6 (32.3)    |
| <2 years, n (%)                       | 62 (29.8%)  | 61 (30.7%)  |
| 2 - 4 years, n (%)                    | 35 (16.8%)  | 30 (15.1%)  |
| 5 - 14 years, n (%)                   | 34 (16.3%)  | 35 (17.6%)  |
| 15 - 24 years, n (%)                  | 12 (5.8%)   | 12 (6.0%)   |
| 25 - 34 years, n (%)                  | 12 (5.8%)   | 9 (4.5%)    |
| 35 - 44 years, n (%)                  | 10 (4.8%)   | 12 (6.0%)   |
| 45 - 54 years, n (%)                  | 9 (4.3%)    | 7 (3.5%)    |
| >55 years, n (%)                      | 34 (16.3%)  | 33 (16.6%)  |
| NAs                                   | 1 (0.5%)    | 2 (1.0%)    |
| <b>Sex, n (%)</b>                     |             |             |
| Male                                  | 111 (52.4%) | 99 (49.0%)  |
| Female                                | 101 (47.6%) | 103 (51.0%) |
| <b>Year of report, n (%)</b>          |             |             |
| 2011                                  | 43 (20.3%)  | 61 (30.2%)  |
| 2012                                  | 41 (19.3%)  | 29 (14.4%)  |
| 2013                                  | 38 (17.9%)  | 30 (14.9%)  |
| 2014                                  | 42 (19.8%)  | 34 (16.8%)  |
| 2015                                  | 48 (22.6%)  | 48 (23.8%)  |
| <b>Size of municipality, n (%)</b>    |             |             |
| <10,000 people                        | 27 (12.7%)  | 28 (13.9%)  |
| ≥10,000 people                        | 177 (83.5%) | 148 (73.3%) |
| NAs                                   | 8 (3.8%)    | 26 (12.9%)  |
| <b>Country of birth, n (%)</b>        |             |             |
| Spain                                 | 194 (91.5%) | 188 (93.1%) |
| Other countries                       | 18 (8.5%)   | 14 (6.9%)   |
| <b>Number of hospital beds, n (%)</b> |             |             |
| <200                                  | 60 (28.3%)  | 65 (32.2%)  |
| ≥200                                  | 149 (70.3%) | 137 (67.8%) |
| NAs                                   | 3 (1.4%)    | 0 (0.0%)    |
| <b>Clinical form, n (%)</b>           |             |             |
| Meningitis                            | 116 (54.7%) | 131 (64.8%) |
| Septicaemia                           | 82 (38.7%)  | 66 (32.7%)  |
| Other forms                           | 14 (6.6%)   | 4 (2.0%)    |
| NAs                                   | 0 (0.0%)    | 1 (0.5%)    |
| <b>Serogroup, n (%)</b>               |             |             |
| A                                     | 0 (0.0%)    | 2 (1.0%)    |
| B                                     | 164 (77.4%) | 153 (75.7%) |
| C                                     | 26 (12.3%)  | 21 (10.4%)  |
| W135                                  | 4 (1.9%)    | 6 (3.0%)    |
| Y                                     | 5 (2.4%)    | 2 (1.0%)    |
| Y/ W135                               | 1 (0.5%)    | 1 (0.5%)    |
| Non-groupable                         | 6 (2.8%)    | 4 (2.0%)    |

|                                 |             |             |
|---------------------------------|-------------|-------------|
| NAs                             | 6 (2.8%)    | 13 (6.4%)   |
| <b>Type of reporting centre</b> |             |             |
| Private                         | 21 (10.0%)  | 1 (0.5%)    |
| Public                          | 190 (90.0%) | 201 (99.5%) |

282

283

NAs: Not available; SDR: Statutory disease reporting; MDR: Microbiological reporting system

284

### 285 Capture-recapture analysis

286 The odds ratio (OR) was 1.01 (95%CI 0.62-1.66), reinforcing the independence of the two  
287 sources.

288 During the period studied, 212 and 202 IMD cases were reported by the SDR and MRS,  
289 respectively. One hundred thirty-seven cases (43.8%) coincided in both sources and 36 cases  
290 (11.5%) were not reported to either source. The estimated number of cases was 313 (95% CI  
291 295–330) (Figure 1) and the estimated incidence rate was 0.83/100,000 persons-year.

292 The sensitivity of the SDR was 67.9% (95%CI 62.7-73.1) and that of the MRS was 64.7%  
293 (95%CI 59.4-70.0) (P<0.001) (Table 2). The sensitivity increased to 88.5% (95%CI 85.0-92.0)  
294 when the datasets were combined.

295

296 **Table 2. Capture–recapture analysis of all invasive meningococcal disease cases reported to the SDR and MRS stratified by characteristics, Catalonia**  
 297 **2011-2015**

|                                 | No. records in SDR | No. records in MRS | Matched records | Calculated unreported cases | Estimated total no. of cases (95% CI) | Sensitivity SDR (%) (95% CI) | Sensitivity MRS (%) (95% CI) | Difference in sensitivities (%) | P-value          |
|---------------------------------|--------------------|--------------------|-----------------|-----------------------------|---------------------------------------|------------------------------|------------------------------|---------------------------------|------------------|
| <b>All cases</b>                | 212                | 202                | 137             | 36                          | 313 (295, 330)                        | 67.9 (62.7, 73.1)            | 64.7 (59.4, 70.0)            | 3.2                             | <b>&lt;0.001</b> |
| <b>Age group</b>                |                    |                    |                 |                             |                                       |                              |                              |                                 |                  |
| <15 years                       | 131                | 126                | 87              | 20                          | 190 (177, 203)                        | 69.1 (62.6, 75.7)            | 66.5 (59.8, 73.2)            | 2.6                             | 0.468            |
| ≥15 years                       | 80                 | 74                 | 49              | 16                          | 121 (109, 133)                        | 66.4 (58.0, 74.8)            | 61.4 (52.7, 70.1)            | 5.0                             |                  |
| <b>Sex</b>                      |                    |                    |                 |                             |                                       |                              |                              |                                 |                  |
| Male                            | 111                | 99                 | 71              | 16                          | 155 (144, 166)                        | 71.8 (64.7, 78.9)            | 64.0 (56.5, 71.6)            | 7.8                             | 0.588            |
| Female                          | 101                | 103                | 66              | 20                          | 158 (145, 171)                        | 64.2 (56.7, 71.7)            | 65.5 (58.1, 72.9)            | -1.3                            |                  |
| <b>Year of report</b>           |                    |                    |                 |                             |                                       |                              |                              |                                 |                  |
| 2011-2013                       | 122                | 120                | 71              | 35                          | 206 (187, 226)                        | 59.3 (52.6, 66.0)            | 58.3 (51.6, 65.1)            | 1.0                             | <b>&lt;0.001</b> |
| 2014-2015                       | 90                 | 82                 | 66              | 6                           | 112 (106, 118)                        | 80.6 (73.2, 87.9)            | 73.4 (65.2, 81.6)            | 7.2                             |                  |
| <b>Size of municipality</b>     |                    |                    |                 |                             |                                       |                              |                              |                                 |                  |
| <10,000 people                  | 27                 | 28                 | 22              | 2                           | 35 (32, 37)                           | 78.7 (65.0, 92.4)            | 81.6 (68.7, 94.6)            | -2.9                            | 0.100            |
| ≥10,000 people                  | 177                | 148                | 110             | 23                          | 238 (225, 252)                        | 74.4 (68.9, 80.0)            | 62.2 (56.1, 68.4)            | 12.2                            |                  |
| <b>Country of birth</b>         |                    |                    |                 |                             |                                       |                              |                              |                                 |                  |
| Spain                           | 194                | 188                | 127             | 32                          | 287 (271, 304)                        | 67.6 (62.2, 73.0)            | 65.5 (60.0, 71.0)            | 2.1                             | 0.696            |
| Other countries                 | 18                 | 14                 | 10              | 3                           | 25 (20, 30)                           | 72.3 (54.7, 89.9)            | 56.2 (36.7, 75.7)            | 16.1                            |                  |
| <b>Number of hospital beds</b>  |                    |                    |                 |                             |                                       |                              |                              |                                 |                  |
| <200                            | 60                 | 65                 | 40              | 13                          | 97 (87, 108)                          | 61.7 (52.1, 71.4)            | 66.9 (57.5, 76.2)            | -5.1                            | 0.514            |
| ≥200                            | 149                | 137                | 97              | 22                          | 210 (197, 224)                        | 70.9 (64.7, 77.0)            | 65.2 (58.7, 71.6)            | 5.7                             |                  |
| <b>Clinical form</b>            |                    |                    |                 |                             |                                       |                              |                              |                                 |                  |
| Meningitis                      | 116                | 131                | 84              | 18                          | 181 (169, 193)                        | 64.2 (57.2, 71.2)            | 72.5 (66.0, 79.0)            | -8.3                            | 0.936            |
| Sepsis                          | 82                 | 66                 | 50              | 10                          | 108 (99, 117)                         | 75.9 (67.9, 84.0)            | 61.1 (51.9, 70.3)            | 14.8                            |                  |
| <b>Type of reporting centre</b> |                    |                    |                 |                             |                                       |                              |                              |                                 |                  |
| Private                         | 21                 | 1                  | 1               | 0                           | 21 (21, 21)                           | 100 (100, 100)               | 4.8 (-4.4, 13.9)             | 95.2                            | <b>0.002</b>     |
| Public                          | 190                | 201                | 136             | 26                          | 281 (267, 295)                        | 67.7 (62.2, 73.2)            | 71.6 (66.4, 76.9)            | -3.9                            |                  |
| <b>Serogrup</b>                 |                    |                    |                 |                             |                                       |                              |                              |                                 |                  |
| B                               | 164                | 153                | 114             | 17                          | 220 (209, 231)                        | 74.6 (68.8, 80.3)            | 69.6 (63.5, 75.6)            | 5.0                             | 0.636            |



1  
2  
3  
4  
5  
6  
7  
8  
9  
10  
11  
12  
13  
14  
15  
16  
17  
18  
19  
20  
21  
22  
23  
24  
25  
26  
27  
28  
29  
30  
31  
32  
33  
34  
35  
36  
37  
38  
39  
40  
41  
42  
43  
44  
45  
46

|   |    |    |    |   |             |                   |                   |      |  |
|---|----|----|----|---|-------------|-------------------|-------------------|------|--|
| C | 26 | 21 | 16 | 3 | 34 (29, 39) | 76.7 (62.5, 90.9) | 61.9 (45.6, 78.3) | 14.8 |  |
|---|----|----|----|---|-------------|-------------------|-------------------|------|--|

298 SDR: Statutory disease reporting; MDR: Microbiological reporting system

For peer review only

1  
2  
3 299 There were no differences in sensitivity between in <15 years and  $\geq 15$  years age group (P-  
4 value=0.468) in either source although it was higher in the <15 years (69.1%;  
5 300 95%CI 62.6-75.7 in the SDR and 66.5%; 95%CI 59.8-73.2 in the MRS). The age groups with  
6 301 the highest sensitivity were 2-4 years in the SDR, with 80.3% (95%CI 68.5-92.1), and 35-44  
7 302 years in the MRS, with 80.5% (95%CI 60.4-100.0) (Figure 2).  
8 303  
9 304 In 2011-2013, sensitivity for the SDR and the MRS were 59.3% (95%CI 52.6-66) and 58.3%  
10 305 (95%CI 51.6-65.1), respectively, lower than that in 2014-2015 (80.6%; 95%CI 73.2-87.9, for  
11 306 the SDR and 73.4%; 95%CI 65.2-81.6, for the MRS (P<0.001)) (Table 2). 2014 showed the  
12 307 highest sensitivity for both sources: 91.3% (95%CI 83.2-99.4) for the SDR and 73.9% (95%CI  
13 308 61.2-86.6) for the MRS (Figure 3). 2011 was the only year in which the MRS had a higher  
14 309 sensitivity than the SDR (56.4%; 95%CI 47.1-65.8 and 39.8%; 95%CI 30.6-49.0, respectively).  
15 310 In private centres the sensitivity of the SDR was 100% (95%CI 100-100) and that of the MRS  
16 311 was 4.8% (95%CI -4.4-13.9). No differences were found in other characteristics analysed.  
17 312 For meningitis, 116 and 131 cases were reported by the SDR and the MRS, respectively. The  
18 313 estimated number of meningitis cases was 181, and 18 cases were not reported by either source.  
19 314 The highest sensitivity was detected in the MRS (72.5%; 95% CI 66-79) compared with the  
20 315 SDR (64.2%; 95%CI 57.2-71.2) (P<0.001) (Table 3). 2014-2015 showed a higher sensitivity in  
21 316 both sources compared with 2011-2013: 82.4% (95%CI 72.7-92) in the MRS and 75.6%  
22 317 (95%CI 64.7-86.5) in the SDR. Public centres had a higher sensitivity in the MRS (77.7%;  
23 318 95%CI 71.4-84.0) and in the SDR (63.9%; 95%CI 56.6-71.2) (P<0.037).  
24 319  
25  
26  
27  
28  
29  
30  
31  
32  
33  
34  
35  
36  
37  
38  
39  
40  
41  
42  
43  
44  
45  
46  
47  
48  
49  
50  
51  
52  
53  
54  
55  
56  
57  
58  
59  
60

320 Table 3. Capture–recapture analysis of meningococcal meningitis reported to the SDR and MRS stratified by characteristics, Catalonia 2011-2015

321

|                                 | No. records in SDR | No. records in MRS | Matched records | Calculated unreported cases | Estimated total no. of cases (95% CI) | Sensitivity SDR (%) (95% CI) | Sensitivity MRS (%) (95% CI) | Difference in sensitivities (%) | P-value          |
|---------------------------------|--------------------|--------------------|-----------------|-----------------------------|---------------------------------------|------------------------------|------------------------------|---------------------------------|------------------|
| <b>All cases</b>                | 116                | 131                | 84              | 18                          | 181 (169, 193)                        | 64.2 (57.2, 71.2)            | 72.5 (66.0, 79.0)            | -8.3                            | <b>&lt;0.001</b> |
| <b>Age group</b>                |                    |                    |                 |                             |                                       |                              |                              |                                 |                  |
| <15 years                       | 72                 | 81                 | 51              | 13                          | 115 (104, 125)                        | 63.1 (54.3, 72.0)            | 71.0 (62.7, 79.3)            | -7.9                            | 0.682            |
| ≥15 years                       | 43                 | 49                 | 32              | 6                           | 66 (60, 73)                           | 65.5 (53.9, 77.0)            | 74.6 (64.1, 85.1)            | -9.1                            |                  |
| <b>Sex</b>                      |                    |                    |                 |                             |                                       |                              |                              |                                 |                  |
| Male                            | 62                 | 69                 | 47              | 7                           | 91 (84, 98)                           | 68.2 (58.6, 77.8)            | 75.9 (67.1, 84.7)            | -7.7                            | 0.245            |
| Female                          | 54                 | 62                 | 37              | 12                          | 91 (81, 101)                          | 59.9 (49.8, 70.0)            | 68.7 (59.2, 78.3)            | -8.9                            |                  |
| <b>Year of report</b>           |                    |                    |                 |                             |                                       |                              |                              |                                 |                  |
| 2011-2013                       | 71                 | 82                 | 47              | 18                          | 124 (111, 137)                        | 57.5 (48.8, 66.2)            | 66.4 (58.1, 74.7)            | -8.9                            | <b>0.013</b>     |
| 2014-2015                       | 45                 | 49                 | 37              | 3                           | 60 (56, 64)                           | 75.6 (64.7, 86.5)            | 82.4 (72.7, 92.0)            | -6.7                            |                  |
| <b>Size of municipality</b>     |                    |                    |                 |                             |                                       |                              |                              |                                 |                  |
| <10,000 people                  | 19                 | 20                 | 16              | 1                           | 24 (22, 26)                           | 80.2 (64.1, 96.2)            | 84.4 (69.8, 99.0)            | -4.2                            | 0.165            |
| ≥10,000 people                  | 93                 | 93                 | 65              | 12                          | 133 (124, 143)                        | 70.0 (62.2, 77.8)            | 70.0 (62.2, 77.8)            | 0.0                             |                  |
| <b>Country of birth</b>         |                    |                    |                 |                             |                                       |                              |                              |                                 |                  |
| Spain                           | 107                | 120                | 77              | 17                          | 167 (155, 179)                        | 64.3 (57.0, 71.5)            | 72.1 (65.3, 78.9)            | -7.8                            | 0.862            |
| Other countries                 | 9                  | 11                 | 7               | 1                           | 14 (12, 17)                           | 64.3 (39.2, 89.4)            | 78.6 (57.1, 100.0)           | -14.3                           |                  |
| <b>Number of hospital beds</b>  |                    |                    |                 |                             |                                       |                              |                              |                                 |                  |
| <200                            | 31                 | 40                 | 23              | 6                           | 54 (47, 61)                           | 57.7 (44.5, 70.9)            | 74.5 (62.8, 86.2)            | -16.8                           | 0.516            |
| ≥200                            | 84                 | 91                 | 61              | 11                          | 126 (116, 135)                        | 67.1 (58.9, 75.4)            | 72.7 (64.9, 80.5)            | -5.6                            |                  |
| <b>Type of reporting centre</b> |                    |                    |                 |                             |                                       |                              |                              |                                 |                  |
| Private                         | 9                  | 1                  | 1               | 0                           | 9 (9, 9)                              | 100.0 (100.0, 100.0)         | 11.1 (-9.4, 31.6)            | 88.9                            | <b>0.037</b>     |
| Public                          | 107                | 130                | 83              | 14                          | 168 (158, 178)                        | 63.9 (56.6, 71.2)            | 77.7 (71.4, 84.0)            | -13.7                           |                  |
| <b>Serogrup</b>                 |                    |                    |                 |                             |                                       |                              |                              |                                 |                  |
| B                               | 91                 | 100                | 70              | 9                           | 130 (122, 138)                        | 70.1 (62.2, 77.9)            | 77.0 (69.7, 84.2)            | -6.9                            | 0.641            |
| C                               | 16                 | 16                 | 11              | 2                           | 23 (19, 27)                           | 69.3 (50.4, 88.1)            | 69.3 (50.4, 88.1)            | 0                               |                  |

322 SDR: Statutory disease reporting; MDR: Microbiological reporting system

1  
2  
3 323 For septicaemia, 82 cases and 66 cases were reported by the SDR and the MRS, respectively.  
4  
5 324 The sensitivity was higher for the SDR (75.9%; 95%CI 67.9-84) than the MRS (61.1%; 95%CI  
6  
7 325 51.9-70.3) (Table 4). There were 108 estimated cases and 10 cases were not reported by either  
8  
9 326 source. The sensitivity was higher in the <15 years than in the  $\geq 15$  years in both sources, but  
10  
11 327 higher in the SDR (81.1%; 95%CI 71.1-91.1 versus 71%; 95%CI 59.4-82.5 for the MRS;  
12  
13 328  $P=0.036$ ), and higher in 2014-2015 than in 2011-2013 (87.6%; 95%CI 78-97.3 for the SDR and  
14  
15 329 71.9%; 95%CI 58.7-85.1 for the MRS) ( $P<0.015$ ).  
16  
17 330 Serogroup B (Supplementary Table 1) showed the sensitivity of the SDR was higher than that of  
18  
19 331 the MRS (74.6%; 95%CI 68.8-80.3 and 69.6%; 95%CI 63.5-75.6, respectively). There were  
20  
21 332 differences according to the period and the type of centre. In 2014-2015, the sensitivity was  
22  
23 333 87.1% (95%CI 79.7-94.5) for the SDR and 78.3% (95%CI 69.2-87.4) for the MRS ( $P<0.002$ ).  
24  
25 334 In private centres, the sensitivity in SDR was 100% compared with 7.1% (95%CI -6.4-20.6)  
26  
27 335 ( $P=0.004$ ) in MRS. The sensitivity was higher for IMD serogroup C cases in SDR than in MRS  
28  
29 336 (76.7%; 95%CI 62.5-90.9 and 62%; 95%CI 45.6-78.3, respectively) (Supplementary Table 2).  
30  
31 337 All 22 deaths were reported in the SDR (CFR: 10.4%), and the sensitivity of the SDR was  
32  
33 338 higher than that of the MRS (100%; 95CI% 100-100 vs 50%; 95%CI 29.1-70.9,  $P=0.104$ ). No  
34  
35 339 differences were found in other characteristics analysed (Supplementary Table 3).  
36  
37  
38  
39  
40  
41  
42  
43  
44  
45  
46  
47  
48  
49  
50  
51  
52  
53  
54  
55  
56  
57  
58  
59  
60

340 Table 4. Capture–recapture analysis of meningococcal septicaemia reported to the SDR and MRS stratified by characteristics, Catalonia 2011-2015

341

|                            | No. records in SDR | No. records in MRS | Matched records | Calculated unreported cases | Estimated total no. of cases (95% CI) | Sensitivity SDR (%) (95% CI) | Sensitivity MRS (%) (95% CI) | Difference in sensitivities (%) | P-value |
|----------------------------|--------------------|--------------------|-----------------|-----------------------------|---------------------------------------|------------------------------|------------------------------|---------------------------------|---------|
| All cases                  | 82                 | 66                 | 50              | 10                          | 108 (99, 117)                         | 75.9 (67.9, 84.0)            | 61.1 (51.9, 70.3)            | 14.8                            | <0.001  |
| Age at notification, years |                    |                    |                 |                             |                                       |                              |                              |                                 |         |
| <15 years                  | 48                 | 42                 | 34              | 4                           | 60 (55, 64)                           | 81.1 (71.1, 91.1)            | 71.0 (59.4, 82.5)            | 10.1                            | 0.036   |
| ≥15 years                  | 34                 | 23                 | 16              | 8                           | 49 (40, 58)                           | 70.3 (57.4, 83.1)            | 47.5 (33.4, 61.6)            | 22.7                            |         |
| Sex                        |                    |                    |                 |                             |                                       |                              |                              |                                 |         |
| Male                       | 43                 | 27                 | 22              | 5                           | 53 (47, 59)                           | 81.8 (71.3, 92.2)            | 51.3 (37.8, 64.8)            | 30.4                            | 0.315   |
| Female                     | 39                 | 39                 | 28              | 5                           | 55 (49, 60)                           | 72.0 (60.0, 83.9)            | 72.0 (60.0, 83.9)            | 0.0                             |         |
| Year of report             |                    |                    |                 |                             |                                       |                              |                              |                                 |         |
| 2011-2013                  | 43                 | 34                 | 22              | 11                          | 66 (56, 77)                           | 65.2 (53.6, 76.7)            | 51.5 (39.5, 63.6)            | 13.6                            | 0.015   |
| 2014-2015                  | 39                 | 32                 | 28              | 2                           | 45 (42, 48)                           | 87.6 (78.0, 97.3)            | 71.9 (58.7, 85.1)            | 15.7                            |         |
| Size of municipality       |                    |                    |                 |                             |                                       |                              |                              |                                 |         |
| <10,000 people             | 7                  | 7                  | 5               | 1                           | 10 (8, 12)                            | 72.2 (44.0, 100.0)           | 72.2 (44.0, 100.0)           | 0.0                             | 0.918   |
| ≥10,000 people             | 71                 | 52                 | 43              | 6                           | 86 (80, 93)                           | 82.9 (74.9, 90.8)            | 60.7 (50.3, 71.0)            | 22.2                            |         |
| Country of birth           |                    |                    |                 |                             |                                       |                              |                              |                                 |         |
| Spain                      | 73                 | 63                 | 47              | 9                           | 98 (90, 106)                          | 74.7 (66.1, 83.3)            | 64.5 (55.0, 74.0)            | 10.2                            | 0.275   |
| Other countries            | 9                  | 3                  | 3               | 0                           | 9 (9, 9)                              | 100.0 (100.0, 100.0)         | 33.3 (2.5, 64.1)             | 66.7                            |         |
| Number of hospital beds    |                    |                    |                 |                             |                                       |                              |                              |                                 |         |
| <200                       | 25                 | 23                 | 16              | 4                           | 36 (31, 42)                           | 70.0 (55.0, 85.1)            | 64.4 (48.7, 80.1)            | 5.6                             | 0.831   |
| ≥200                       | 56                 | 43                 | 34              | 6                           | 71 (65, 78)                           | 79.2 (69.7, 88.7)            | 60.8 (49.4, 72.2)            | 18.4                            |         |
| Type of reporting centre   |                    |                    |                 |                             |                                       |                              |                              |                                 |         |
| Private                    | 9                  | 0                  | 0               | 0                           | 9 (9, 9)                              | 100.0 (100.0, 100.0)         | 0 (0.0, 0.0)                 | 100                             | 0.988   |
| Public                     | 73                 | 66                 | 50              | 8                           | 97 (89, 104)                          | 75.9 (67.3, 84.4)            | 68.6 (59.3, 77.9)            | 7.3                             |         |
| Serogrup                   |                    |                    |                 |                             |                                       |                              |                              |                                 |         |
| B                          | 66                 | 51                 | 43              | 4                           | 78 (73, 84)                           | 84.4 (76.4, 92.4)            | 65.2 (54.7, 75.8)            | 19.2                            | 0.661   |
| C                          | 8                  | 4                  | 4               | 0                           | 8 (8, 8)                              | 100 (100, 100)               | 50.0 (15.4, 84.7)            | 50.0                            |         |

342

1  
2  
3  
4  
5  
6  
7  
8  
9  
10  
11  
12  
13  
14  
15  
16  
17  
18  
19  
20  
21  
22  
23  
24  
25  
26  
27  
28  
29  
30  
31  
32  
33  
34  
35  
36  
37  
38  
39  
40  
41  
42  
43  
44  
45  
46

343 SDR: Statutory disease reporting; MDR: Microbiological reporting system

344

For peer review only

1  
2  
3 345 The results of the multivariate model for all cases are shown in Table 5. The variables  
4  
5 346 considered to define the sensitivity of the two sources were year of report (2011-2013 versus  
6  
7 347 2014-2015) and size of municipality. With these variables in the model, the adjusted estimate of  
8  
9 348 the total number of cases was 279 cases (95%CI 266-296) and the estimated incidence rate was  
10  
11 349 0.7/100,000 persons-year.

12  
13  
14 350

15  
16 351 **Table 5. Variables defining the sensitivity of the SDR and MRS in detecting invasive**  
17 352 **meningococcal diseases cases. Multivariate model.**

18 353  
19 354

|                                                               | <b>OR (95%CI)</b> | <b><i>p-value</i></b> |
|---------------------------------------------------------------|-------------------|-----------------------|
| <b>Year of report (2014-2015)</b>                             | 2.29 (1.35, 3.89) | <b>0.002</b>          |
| <b>Size of municipality (<math>\geq 10,000</math> people)</b> | 0.51 (0.23, 1.12) | 0.093                 |

20  
21  
22  
23 355 OR: odds ratio; n estimate: 279 (266, 296)

24  
25 356

## 26 27 357 **DISCUSSION**

28  
29 358 The sensitivity obtained by combining the two surveillance system for IMD cases was 88.5%,  
30  
31 359 greater than for each source. Globally, the SDR showed higher sensitivity than the MDR,  
32  
33 360 mainly for cases of sepsis, serogroup B and serogroup C, although for meningitis the sensitivity  
34  
35 361 of the MDR was higher than that of the SDR.

36  
37 362 Sensitivity of SDR was 67.9%, very close to that of 66.5% found by Andrianou et al. in Italy in  
38  
39 363 a study carried out in 2018 using the hospital discharge records system as the external source.  
40  
41 364 [31]

42  
43 365 Other studies found greater sensitivities by combining data systems than we did. Baldovin et al.  
44  
45 366 [32] in Italy, reported an overall sensitivity of 94.7% by combining four data sources  
46  
47 367 (mandatory notification system, laboratory surveillance, invasive bacterial surveillance and  
48  
49 368 hospital discharge). Jansson et al. [33], in Sweden, found a global sensitivity of 98.7%, 91.1%  
50  
51 369 for clinical notification and 85.4% for laboratory reporting. In Austria a good agreement  
52  
53 370 between the National Reference Center for meningococci and the hospital discharge was found,  
54  
55 371 although a clinical review of hospital discharge data was necessary to detect false positive cases  
56  
57 372 recorded. [34]

1  
2  
3 373 Globally, the sensitivity was similar in children aged <15 years than in persons aged  $\geq$ 15 years  
4  
5 374 in both sources (69.1% for the SDR and 66.5% for the MRS;  $P=0.468$ ). The differences could  
6  
7 375 be because there is greater sensibilization to declare pediatric cases than adult cases or because  
8  
9 376 there are differences on IMD incidence according to age. [9] Gibson et al., [35] in Australia,  
10  
11 377 analysed IMD sensitivity in children aged < 15 years in three sources: notifiable system,  
12  
13 378 hospitalized patients and mortality data. They found a greater sensitivity (99.5%) than we did,  
14  
15 379 although 15% of hospitalized children were false-positive cases.  
16  
17 380 Sensitivity was higher in 2014-2015 than in 2011-2013 for both sources (SDR and MRS). SDR  
18  
19 381 had overall higher sensitivity for IMD cases, septicaemia cases as well as serogroup B and C  
20  
21 382 cases, but not for meningitis cases for which MRS had higher sensitivity. The improvement in  
22  
23 383 notification in the years 2014-2015 may be due to different causes, one could be that there is  
24  
25 384 greater awareness for the notification of infectious diseases to public health surveillance  
26  
27 385 systems, although it should be analysed in subsequent studies. In a different way, Andrianou et  
28  
29 386 al [31] compared the surveillance of the Italian IMD with the registry of hospital discharges, and  
30  
31 387 found a lower sensitivity in 2018 compared to 2015-2017. This yearly evaluation allows the  
32  
33 388 detection of problems in the notification process.  
34  
35 389 We found a greater sensitivity for meningitis in the MRS than in the SDR (72.5% vs 64.2%) but  
36  
37 390 not for septicaemia (61.1% vs 75.9%). Multiple reasons could explain this fact. A possible  
38  
39 391 explanation is that meningitis has a specific section in MRS for reporting while septicaemia is  
40  
41 392 reported in bacteraemia of unknown focus section and it could be confused. It is important to  
42  
43 393 determine the reason for this lower sensitivity to septicaemia in order to improve the  
44  
45 394 completeness of MRS reporting. It is difficult to compare our results with those of other studies,  
46  
47 395 since other sources of information were used or the independence of data sources was presumed  
48  
49 396 but not demonstrated, [34] which is essential when using the capture-recapture method.  
50  
51 397 Notification of confirmed cases of IMD by laboratories is essential in epidemiological  
52  
53 398 surveillance. [36] Molecular information on circulating serogroups that is required to implement  
54  
55 399 public health measures such as vaccination is essential to control the disease [37] and evaluate  
56  
57 400 the impact of available vaccines.  
58  
59  
60



1  
2  
3 401 In the absence of automated electronic reporting, monitoring and increasing the speed of  
4  
5 402 laboratory reports may allow the public health department to administer chemoprophylaxis and  
6  
7 403 vaccination to contacts. [27] Although a higher sensitivity has been reported for electronic  
8  
9 404 reporting than for paper-based reports by some authors, [38] during the study period, automated  
10  
11 405 electronic reporting was used in the SDR but not in the MDR, which may explain, at least in  
12  
13 406 part, why the MDR had a lower sensitivity than the SDR. [39]  
14  
15 407 In the multivariate model, the 2014-2015 period and the size of the municipality show a higher  
16  
17 408 sensitivity in the SDR, suggesting that IMD was well recorded in the two surveillance systems,  
18  
19 409 although 36 cases (11.5%) were not captured by either source. This suggests there was  
20  
21 410 underreporting, despite the clinical severity of the disease. Other authors have also found  
22  
23 411 underreporting of this disease. [40] It is very important to improve reporting by all physicians  
24  
25 412 and microbiologists to the SDR and MDR to assess the impact of interventions such as  
26  
27 413 immunization.  
28  
29 414 The estimated IMD incidence rate of 0.7/100,000 persons-year found in the multivariate model  
30  
31 415 is less than that found using capture-recapture (0.83/100,000 persons-year) but higher than that  
32  
33 416 calculated using the SDR (0.56/100,000 persons-year) or MDR data (0.54/100,000 persons-  
34  
35 417 year). Other European studies showed incidence rates of between 0.39 [32] and 1.18/100,000  
36  
37 418 persons-year. [34]  
38  
39 419 The sensitivity of the two sources were intermediate (67.9% for the SDR and 64.7% for the  
40  
41 420 MRS). The lower sensitivity of the MRS may be due to the fact that the MRS is a sentinel  
42  
43 421 system with a coverage of 83% of acute hospital beds and without private centres. In our series,  
44  
45 422 21 cases (10%) included in the SDR were reported by private centres, while only one case  
46  
47 423 (0.5%) was reported to the MSR; this patient was finally transferred to a public hospital. The  
48  
49 424 inclusion of cases that have an equal probability of selection in one source might lead to an  
50  
51 425 overestimation. Other authors have reported this limitation when the hospital discharge data set  
52  
53 426 includes probable cases which are not included in the reference centre. [34]  
54  
55 427 Death was registered in 22 cases (10.5%), similar to that reported in other European countries  
56  
57 428 [2] but slightly lower than that observed in Italy (14%) using the capture-recapture method. [32]

1  
2  
3 429 All cases were reported to the SDR but only 50% were reported to the MRS, indicating that  
4  
5 430 clinical data are better in the SDR than in the MRS. Other authors have used mortality data for  
6  
7 431 capture-recapture analysis and concluded that all deaths were reported in notifiable systems.  
8  
9 432 [34]

10  
11 433 The sensitivity of the sources studied for the surveillance of IMD cannot be generalized to other  
12  
13 434 diseases because physicians' or microbiologists' perception of the importance of IMD differs  
14  
15 435 from that of other diseases. [38]

16  
17 436 The main strength of this study is that the two sources had wide coverage. The SDR is a  
18  
19 437 universal epidemiological surveillance source and, unlike the MDR, is a sentinel source, with a  
20  
21 438 high coverage of 83%. Cases with PIC accounted for 85.5% of all cases reported to detect  
22  
23 439 whether cases were coincident or not. In addition, the independence of the two sources was  
24  
25 440 demonstrated, complying with the premise of the capture-recapture method.

26  
27 441 A limitation of the study was that not all cases had the same probability of being selected from a  
28  
29 442 given source. Cases diagnosed in private centres or public centres that did not participate in the  
30  
31 443 MRS could not be reported by this system and this may explain, at least in part, the lower  
32  
33 444 sensitivity than the SDR. This highlights the importance of including public and private centres  
34  
35 445 to increase the robustness of the MRS. Another limitation was that we did not analyse the role  
36  
37 446 of the electronic surveillance system, although a previous study detected greater sensitivity of  
38  
39 447 the SDR when electronic surveillance was introduced. [39]

40  
41  
42  
43 448

#### 44 449 **CONCLUSIONS**

45  
46 450 The sensitivity of enhanced surveillance through the combination of two complementary  
47  
48 451 sources (statutory reporting by physicians and microbiological reporting by microbiologists)  
49  
50 452 was higher than that of the individual sources. These systems are complementary and constitute  
51  
52 453 the basic sources of information necessary for adequate epidemiological surveillance of IMD.  
53  
54 454 Specific studies to estimate the factors associated with under-reporting are needed to reinforce  
55  
56 455 epidemiological surveillance of this disease.  
57  
58  
59  
60 456

1  
2  
3 457  
4  
5

6 458 **DECLARATIONS**  
7

8  
9 459 **Ethics approval and consent to participate**

10  
11  
12 460 Not applicable  
13

14  
15 461 **Consent of publication**

16  
17  
18 462 Not applicable  
19

20  
21 463 **Availability of data and materials**  
22

23  
24 464 The datasets used and analysed during the current study available from the corresponding author  
25  
26 465 on reasonable request.

27  
28 466 **Competing interests**

29  
30 467 The authors declare that they have no competing interests.  
31

32 468 **Funding**  
33

34  
35 469 This work was supported partially by CIBER of Epidemiology and Public Health (CIBERESP),  
36  
37 470 Carlos III Health Institute and the Catalan Agency for the Management of Grants for University  
38  
39 471 Research [AGAUR Grant Number 2017 / SGR 1342]. The funding sources played no part in the  
40  
41 472 design of the study and collection, analysis, and interpretation of data and in writing the  
42  
43 473 manuscript.  
44

45  
46 474 **Author contributions**  
47

48  
49 475 PC analyzed and interpreted data, studied conception and design of the study and writes the  
50  
51 476 manuscript; MV and NS did statistical analysis; GC revised and collected data; TG,SH,LR  
52  
53 477 collected data; MJ revised the study and AD did critical revision and got funding.  
54

55  
56 478 **Acknowledgements**  
57  
58  
59  
60

1  
2  
3 **479 The Working Group of the Microbiological Reporting System of Catalonia is composed**

4  
5 **480 by:**

6  
7  
8 481 M. Teresa Bastida (Fundació Hospital Esperit Sant); Frederic Ballester; Isabel Pujol (Hospital  
9  
10 482 Universitari de Sant Joan de Reus); Miguel Ángel Benítez, Alba Cebollero (Consorti de  
11  
12 483 Laboratoris Intercomarcal de l'Alt Penedès); Jordi Vila, Jordi Bosch, (Hospital Clínic); Ana  
13  
14 484 Calderón (Hospital Municipal de Badalona); Margarida Curriu (Hospital Comarcal de Sant  
15  
16 485 Bernabé); M. Ángeles Domínguez, Fe Tubau Quintano (Hospital Universitari de Bellvitge);  
17  
18 486 Jose Manuel Ramírez (Hospital Universitari de Girona Dr. Josep Trueta); Ma José Fusté  
19  
20 487 (Clínica de Terres de l'Ebre); Carme Gallés, Pilar Hernández Pérez, Elisenda Capdevila Gil de  
21  
22 488 Bernabé Corporació de Salut del Maresme i La Selva); Paula Gassiot (Hospital de Figueres);  
23  
24 489 Frederic Gómez (Hospital Universitari de Tarragona Joan XXIII); Araceli González-Cuevas  
25  
26 490 (Hospital General del Parc Sanitari Sant Joan de Déu); Marius Juanpere (Hospital Móra  
27  
28 491 d'Ebre); Carmen Muñoz-Almagro, Amaresh Pérez-Argüello (Hospital Sant Joan de Déu.  
29  
30 492 Esplugues de Llobregat); Carmina Martí (Hospital General de Granollers); Núria Margall  
31  
32 493 (Hospital de la Santa Creu i Sant Pau); Lurdes Matas, Montserrat Gimenez (Hospital  
33  
34 494 Universitari Germans Trias i Pujol); Montserrat Morta, Glòria Trujillo (Hospital Sant Joan de  
35  
36 495 Déu. Manresa-Fundació Althaia); Sílvia Noguer (Hospital del Vendrell); Montserrat Olsina  
37  
38 496 (Hospital General de Catalunya); Amaia Oteiza (H. Palamós); Pepa Pérez (Catlab-Centre  
39  
40 497 Analítiques Terrassa); Mar Olga Pérez-Moreno (Hospital Verge de la Cinta de Tortosa); Tomás  
41  
42 498 Pumarola, Juanjo González (Hospital Universitari Vall d'Hebron); Xavier Raga (Hospital de  
43  
44 499 Sant Pau i Santa Tecla); Mercè Garcia, Mercè Ribelles (Hospital Universitari Arnau de  
45  
46 500 Vilanova de Lleida); Esther Sanfeliu (Hospital d'Olot Comarcal de la Garrotxa); Goretti Sauca  
47  
48 501 (Hospital de Mataró); Dionisia Fontanals, Isabel Sanfeliu (Corporació Sanitaria Parc Taulí,  
49  
50 502 Sabadell) i Anna Vilamala (Hospital General de Vic).

51  
52  
53  
54  
55 **503 The Working Group of the Epidemiological Surveillance Network of Catalonia is**

56  
57 **504 composed by:**  
58  
59  
60

1  
2  
3 505 César Arias, Irene Barrabeig, Neus Camps, Mònica Carol, Núria Follia, Pere Godoy, Ana  
4  
5 506 Martínez, Sofia Minguell, Ignasi Parron, M<sup>a</sup> Rosa Sala-Farré, Ariadna Rovira (Agència de Salut  
6  
7 507 Pública de Catalunya), Cristina Rius (Agència de Salut Pública de Barcelona).  
8  
9

10 508  
11  
12

13 509 **Working Group of the Microbiological Reporting System of Catalonia and Working**

14  
15 510 **Group of the Epidemiological Surveillance Network of Catalonia**  
16

17 511  
18

19 512 Maria Teresa Bastida  
20

21 513 Laboratori de Microbiologia  
22

23 514 Fundació Hospital Esperit Sant  
24

25 515 C/ Pons i Rabadà s/n  
26

27 516 08923 Santa Coloma de Gramenet, Spain  
28  
29

30 517  
31

32 518 Frederic Ballester  
33

34 519 Laboratori de Referencia Sud  
35

36 520 Hospital Sant Joan de Reus  
37

38 521 Av. Dr Josep Laporte, 2,  
39

40 522 43204 Reus, Tarragona, Spain  
41

42 523  
43

44 524 Isabel Pujol  
45

46 525 Laboratori de Referencia Sud  
47

48 526 Hospital Sant Joan de Reus  
49

50 527 Av. Dr Josep Laporte, 2,  
51

52 528 43204 Reus, Tarragona, Spain  
53  
54

55 529  
56

57 530 Miguel Angel Benítez  
58

59 531 Servei de Microbiologia  
60

1  
2  
3 532 CLILAB Diagnòstics  
4  
5 533 C/ Espirall, s/n  
6  
7 534 08720 Vilafranca del Penedès, Barcelona, Spain  
8  
9 535  
10  
11 536 Alba Cebollero  
12  
13 537 Servei de Microbiologia  
14  
15 538 CLILAB Diagnòstics  
16  
17 539 C/ Espirall, s/n  
18  
19 540 08720 Vilafranca del Penedès, Barcelona, Spain  
20  
21  
22 541  
23  
24 542 Jordi Vila  
25  
26 543 Servei de Microbiologia  
27  
28 544 Hospital Clínic de Barcelona  
29  
30 545 C/ Villarroel, 170  
31  
32 546 08036 Barcelona, Spain.  
33  
34 547  
35  
36 548 Jordi Bosch  
37  
38 549 Servei de Microbiologia  
39  
40 550 Hospital Clínic de Barcelona  
41  
42 551 C/ Villarroel, 170  
43  
44 552 08036 Barcelona, Spain.  
45  
46 553  
47  
48 554 Ana Calderon  
49  
50 555 Servei de Microbiologia  
51  
52 556 Hospital Municipal de Badalona  
53  
54 557 C/ Via Augusta, 9-13  
55  
56 558 08911 Badalona, Barcelona, Spain  
57  
58  
59  
60 559

1  
2  
3 560 Margarida Curriu  
4  
5 561 Servei de Microbiologia  
6  
7 562 Hospital Sant Bernabé  
8  
9 563 Ctra. de Ribes, s/n  
10  
11 564 08600 Berga, Spain  
12  
13 565  
14  
15 566 M Angeles Dominguez  
16  
17 567 Hospital Universitari de Bellvitge, Universitat de Barcelona,  
18  
19 568 C/ Feixa Llarga s/n  
20  
21 569 08907 L'Hospitalet, Barcelona, Spain  
22  
23 570  
24  
25 571 Fe Tubau Quintano  
26  
27 572 Hospital Universitari de Bellvitge, Universitat de Barcelona,  
28  
29 573 C/ Feixa Llarga s/n  
30  
31 574 08907 L'Hospitalet, Barcelona, Spain  
32  
33 575  
34  
35 576 Jose Manuel Ramirez  
36  
37 577 Àrea de Microbiologia, Laboratori Clínic - Institut Català de la Salut Girona  
38  
39 578 Hospital Universitari Dr. Josep Trueta  
40  
41 579 Av. França, s/n  
42  
43 580 17007 Girona, Spain  
44  
45 581  
46  
47 582 M<sup>a</sup> Jose Fusté  
48  
49 583 Servei de Microbiologia  
50  
51 584 Clínica Terres de l'Ebre  
52  
53 585 Pl. De Joaquim Bau, 6-8  
54  
55 586 43500 Tortosa, Tarragona, Spain  
56  
57 587  
58  
59  
60

- 1  
2  
3 588 Carme Gallés  
4  
5 589 Unitat de Microbiologia, Servei d'Anàlisis Clíniques  
6  
7 590 Corporació de Salut del Maresme i la Selva  
8  
9 591 C/ Sant Jaume, 209-217  
10  
11 592 08370 Calella, Barcelona, Spain  
12  
13 593  
14  
15 594 Pilar Hernandez Pérez  
16  
17 595 Unitat de Microbiologia, Servei d'Anàlisis Clíniques  
18  
19 596 Corporació de Salut del Maresme i la Selva.  
20  
21 597 C/ Sant Jaume, 209-217  
22  
23 598 08370 Calella, Barcelona, Spain  
24  
25 599  
26  
27 600 Elisenda Capdevila Gil de Bernabe  
28  
29 601 Unitat de Microbiologia, Servei d'Anàlisis Clíniques  
30  
31 602 Corporació de Salut del Maresme i la Selva.  
32  
33 603 C/ Sant Jaume, 209-217  
34  
35 604 08370 Calella, Barcelona, Spain  
36  
37 605  
38  
39 606 Paula Gassiot  
40  
41 607 Àrea de Microbiologia, Laboratori d'Anàlisis Clíniques  
42  
43 608 Hospital de Figueres  
44  
45 609 Rda. Rector Arolas, s/n  
46  
47 610 17600 Figueres, Girona, Spain  
48  
49 611  
50  
51 612 Frederic Gómez-Bertomeu  
52  
53 613 Àrea de Microbiologia, Laboratori Clínic ICS - Camp de Tarragona  
54  
55 614 Hospital Joan XXIII  
56  
57 615 C/ Dr. Mallafrè Guasch, 4  
58  
59  
60



1  
2  
3 616 43005 Tarragona, Spain  
4  
5 617  
6  
7 618 Araceli González-Cuevas  
8  
9 619 Laboratori de Microbiologia  
10  
11 620 Hospital General del Parc Sanitari Sant Joan de Déu  
12  
13 621 Camí Vell de la Colònia, 25  
14  
15 622 08830 Sant Boi de Llobregat, Barcelona, Spain  
16  
17 623  
18  
19 624 Marius Juanpere  
20  
21 625 Servei de Microbiologia  
22  
23 626 Hospital Comarcal Móra d'Ebre  
24  
25 627 C/ de Benet Messeguer, s/n  
26  
27 628 43770 Móra d'Ebre, Tarragona, Spain  
28  
29 629  
30  
31 630 Carmen Muñoz-Almagro  
32  
33 631 Hospital Universitari Sant Joan de Déu  
34  
35 632 Pg. Sant Joan de Déu 2  
36  
37 633 08950 Esplugues, Barcelona, Spain  
38  
39 634  
40  
41 635 Amaresch Perez Arguello  
42  
43 636 Hospital Universitari Sant Joan de Déu  
44  
45 637 Pg. Sant Joan de Déu 2  
46  
47 638 08950 Esplugues, Barcelona, Spain  
48  
49 639  
50  
51 640 Carmina Martí  
52  
53 641 Laboratori de Microbiologia  
54  
55 642 Hospital General de Granollers  
56  
57 643 Av. Francesc Ribas, s/n  
58  
59  
60

1  
2  
3 644 08402 Granollers, Barcelona, Spain  
4  
5 645  
6  
7 646 Nuria Margall  
8  
9 647 Servei de Microbiologia  
10  
11 648 Hospital Santa Creu i Sant Pau  
12  
13 649 C/ de Sant Quintí, 89  
14  
15 650 08041 Barcelona, Spain  
16  
17 651  
18  
19 652 Lurdes Matas  
20  
21 653 Laboratori clínic Metropolitana Nord  
22  
23 654 Hospital Universitari Germans Trias i Pujol  
24  
25 655 Ctra. de Canyet, s/n  
26  
27 656 08916 Badalona, Barcelona, Spain  
28  
29 657  
30  
31 658 Montserrat Giménez  
32  
33 659 Laboratori clínic Metropolitana Nord  
34  
35 660 Hospital Universitari Germans Trias i Pujol  
36  
37 661 Ctra. de Canyet, s/n  
38  
39 662 08916 Badalona, Barcelona, Spain  
40  
41 663  
42  
43 664 Montserrat Morta  
44  
45 665 Servei de Microbiologia  
46  
47 666 Hospital Sant Joan de Déu. Fundació ALTHAIA  
48  
49 667 C/ Dr. Joan Soler, s/n  
50  
51 668 08243 Manresa, Barcelona, Spain  
52  
53 669  
54  
55 670 Gloria Trujillo  
56  
57 671 Servei de Microbiologia  
58  
59  
60

- 1  
2  
3 672 Hospital Sant Joan de Déu. Fundació ALTHAIA  
4  
5 673 C/ Dr. Joan Soler, s/n  
6  
7 674 08243 Manresa, Barcelona, Spain  
8  
9 675  
10  
11 676 Silvia Noguer  
12  
13 677 Hospital del vendrell  
14  
15 678 Ctra. Barcelona, s/n,  
16  
17 679 43700 El Vendrell, Tarragona, Spain  
18  
19  
20 680  
21  
22  
23 681 Montserrat Olsina  
24  
25 682 Laboratori d'Anàlisis Clínics, Microbiologia  
26  
27 683 Hospital General de Catalunya  
28  
29 684 C/ Pedro i Pons, 1  
30  
31 685 08190 Sant Cugat del Vallès, Barcelona, Spain  
32  
33  
34 686  
35  
36 687 Amaia Oteiza Ubanell  
37  
38 688 Laboratori d'Anàlisis Clíniques  
39  
40 689 Hospital de Palamós  
41  
42 690 C/ Hospital, 36,  
43  
44 691 17230 Palamós, Spain  
45  
46 692  
47  
48 693 Pepa Perez  
49  
50 694 Departament de Microbiologia, Catlab - Centre Analítiques Terrassa, AIE  
51  
52 695 Parc Logístic de Salut  
53  
54 696 Vial Sant Jordi, s/n  
55  
56 697 08232 Viladecavalls, Barcelona, Spain  
57  
58  
59 698  
60

- 1  
2  
3 699 Mar Olga Pérez-Moreno  
4  
5 700 Àrea de Microbiologia, Laboratori Clínic ICS - Terres de l'Ebre  
6  
7 701 Hospital Verge de la Cinta  
8  
9 702 C/ de les Esplanetes, 14  
10  
11 703 43500 Tortosa, Tarragona, Spain  
12  
13 704  
14  
15 705 Tomas Pumarola  
16  
17 706 Servei de Microbiologia  
18  
19 707 Hospital Universitari Vall d'Hebron  
20  
21 708 Pg. De la Vall d'Hebron, 119-129  
22  
23 709 08035 Barcelona, Spain  
24  
25 710  
26  
27 711 Juanjo Gonzales  
28  
29 712 Servei de Microbiologia  
30  
31 713 Hospital Universitari Vall d'Hebron  
32  
33 714 Pg. De la Vall d'Hebron, 119-129  
34  
35 715 08035 Barcelona, Spain  
36  
37 716  
38  
39 717 Xavier Raga  
40  
41 718 Laboratori de Microbiologia  
42  
43 719 Hospital Sant Pau i Santa Tecla  
44  
45 720 Rambla Vella, 14  
46  
47 721 43003 Tarragona, Spain  
48  
49 722  
50  
51 723 Mercè Garcia  
52  
53 724 Secció Microbiologia, Servei d'Anàlisis Clíniques  
54  
55 725 Hospital Universitari Arnau de Vilanova de Lleida  
56  
57 726 Av. Rovira Roure, 80  
58  
59  
60

- 1  
2  
3 727 25198 Lleida, Barcelona, Spain  
4  
5 728  
6  
7 729 Mercè Ribelles  
8  
9 730 Secció Microbiologia, Servei d'Anàlisis Clíniques  
10  
11 731 Hospital Universitari Arnau de Vilanova de Lleida  
12  
13 732 Av. Rovira Roure, 80  
14  
15 733 25198 Lleida, Barcelona, Spain  
16  
17 734  
18  
19  
20 735 Esther Sanfeliu  
21  
22 736 Servei d'Anàlisis Clíniques, Secció de Microbiologia  
23  
24 737 Hospital d'Olot Comarcal de la Garrotxa  
25  
26 738 Av. dels Països Catalans, 86  
27  
28 739 17800 Olot, Girona, Spain  
29  
30 740  
31  
32 741 Goretti Sauca  
33  
34 742 Servei d'Anàlisis clíniques, secció de Microbiologia  
35  
36 743 Hospital de Mataró  
37  
38 744 Ctra. de Cirera, 230  
39  
40 745 08304 Mataró, Barcelona, Spain  
41  
42 746  
43  
44  
45 747 Dionisia Fontanals  
46  
47 748 Secció de Microbiologia  
48  
49 749 Parc Taulí Hospital Universitari, Institut d'Investigació i Innovació Parc Taulí I3PT, UAB  
50  
51 750 C/ Parc del Taulí, 1  
52  
53 751 08208 Sabadell, Barcelona, Spain  
54  
55 752 Isabel Sanfeliu  
56  
57 753 Secció de Microbiologia  
58  
59 754 Parc Taulí Hospital Universitari, Institut d'Investigació i Innovació Parc Taulí I3PT, UAB  
60

- 1  
2  
3 755 C/ Parc del Taulí, 1  
4  
5 756 08208 Sabadell, Barcelona, Spain  
6  
7 757  
8  
9 758 Anna Vilamala  
10  
11 759 Servei de Microbiologia  
12  
13 760 Consorci Hospitalari de Vic  
14  
15 761 C/ Francesc Pla 'El Vigatà', 1  
16  
17 762 08500 Vic, Barcelona, Spain  
18  
19 763  
20  
21  
22 764 **The Working Group of the Epidemiological Surveillance Network of Catalonia is**  
23  
24 765 **composed by:**  
25  
26 766 César Arias  
27  
28 767 Servei de Vigilància Epidemiològica i Resposta a Emergències de Salut Pública al Vallès  
29  
30 768 Occidental i Vallès Oriental  
31  
32 769 Carretera de Vallvidrera, 38 (CAP Turó de Can Mates)  
33  
34 770 08173 Sant Cugat del Vallès, Spain  
35  
36 771  
37  
38 772 Irene Barrabeig  
39  
40 773 Servei de Vigilància Epidemiològica i Resposta a Emergències de Salut Pública a Barcelona  
41  
42 774 Sud  
43  
44 775 Carrer de la Feixa Llarga, s/n, Antiga Escola d'Infermeria, 3a. planta (Hospital Universitari de  
45  
46 776 Bellvitge)  
47  
48 777 08907 L'Hospitalet de Llobregat, Spain  
49  
50 778  
51  
52 779 Neus Camps  
53  
54 780 Servei de Vigilància Epidemiològica i Resposta a Emergències de Salut Pública a Girona  
55  
56 781 Plaça de Pompeu Fabra, 1  
57  
58 782 17002 Girona, Spain  
59  
60

- 1  
2  
3 783  
4  
5 784 Mònica Carol  
6  
7 785 Servei de Vigilància Epidemiològica i Resposta a Emergències de Salut Pública a la Catalunya  
8  
9 786 Central  
10  
11 787 Carrer Muralla de Sant Francesc, 49 4a planta - Edifici Pere III  
12  
13 788 08241 Manresa, Spain  
14  
15  
16 789  
17  
18 790 Núria Follia  
19  
20 791 Servei de Vigilància Epidemiològica i Resposta a Emergències de Salut Pública a Girona  
21  
22 792 Plaça de Pompeu Fabra, 1  
23  
24 793 17002 Girona, Spain  
25  
26 794  
27  
28 795 Pere Godoy  
29  
30 796 Servei de Vigilància Epidemiològica i Resposta a Emergències de Salut Pública a Lleida i Alt  
31  
32 797 Pirineu i Aran  
33  
34 798 Avinguda de l'Alcalde Rovira Roure, 2  
35  
36 799 25006 Lleida, Spain  
37  
38  
39 800  
40  
41 801 Ana Martínez  
42  
43 802 Sub-direcció General de Vigilància i Resposta a Emergències de Salut Pública  
44  
45 803 Agència de Salut Pública de Catalunya, Generalitat de Catalunya  
46  
47 804 C/ Roc Boronat, 81-95  
48  
49 805 08005 Barcelona, Spain  
50  
51 806  
52  
53 807 Sofia Minguell  
54  
55 808 Servei de Vigilància Epidemiològica i Resposta a Emergències de Salut Pública al Camp de  
56  
57 809 Tarragona i Terres de l'Ebre  
58  
59 810 Avinguda de la Reina Maria Cristina, 54  
60

- 1  
2  
3 811 43002 Tarragona, Spain  
4  
5 812  
6  
7 813 Ignasi Parron  
8  
9 814 Servei de Vigilància Epidemiològica i Resposta a Emergències de Salut Pública al Barcelonès  
10  
11 815 Nord i Maresme  
12  
13 816 C/ Roc Boronat, 81-95  
14  
15 817 08005 Barcelona, Spain  
16  
17 818  
18  
19 819 M<sup>a</sup> Rosa Sala-Farré  
20  
21 820 Servei de Vigilància Epidemiològica i Resposta a Emergències de Salut Pública al Vallès  
22  
23 821 Occidental i Vallès Oriental  
24  
25 822 Carretera de Vallvidrera, 38 (CAP Turó de Can Mates)  
26  
27 823 08173 Sant Cugat del Vallès, Spain  
28  
29 824  
30  
31 825 Ariadna Rovira  
32  
33 826 Servei de Vigilància Epidemiològica i Resposta a Emergències de Salut Pública a Barcelona  
34  
35 827 Sud  
36  
37 828 Carrer de la Feixa Llarga, s/n, Antiga Escola d'Infermeria, 3a. planta (Hospital Universitari de  
38  
39 829 Bellvitge)  
40  
41 830 08907 L'Hospitalet de Llobregat, Spain  
42  
43 831  
44  
45 832 Cristina Rius  
46  
47 833 Agència de Salut Pública de Barcelona  
48  
49 834 Plaça de Lesseps, 1  
50  
51 835 08023 Barcelona, Spain  
52  
53 836  
54  
55  
56  
57  
58 837 **References**  
59  
60



- 1  
2  
3 838 1. World Health Organization. Laboratory methods for the diagnosis of meningitis caused  
4  
5 839 by *Neisseria meningitidis*, *Streptococcus pneumoniae*, and *Haemophilus influenzae*:  
6  
7 840 WHO manual, 2nd ed. Geneva: WHO, 2011.
- 8  
9 841 2. European Center for Disease Prevention and Control. Surveillance atlas on infectious  
10  
11 842 diseases, 2018. Available at: [https://www.ecdc.europa.eu/en/meningococcal-](https://www.ecdc.europa.eu/en/meningococcal-disease/surveillance-and-disease-data/atlas)  
12  
13 843 [disease/surveillance-and-disease-data/atlas](https://www.ecdc.europa.eu/en/meningococcal-disease/surveillance-and-disease-data/atlas)
- 14  
15 844 3. Centro Nacional de Epidemiología. Enfermedades de declaración obligatoria. España  
16  
17 845 2018. Available at:  
18  
19 846 <https://www.isciii.es/QueHacemos/Servicios/VigilanciaSaludPublicaRENAVE/Enferme>  
20  
21 847 [dadesTransmisibles/Documents/INFORMES/INFORMES](https://www.isciii.es/QueHacemos/Servicios/VigilanciaSaludPublicaRENAVE/Enferme)  
22  
23 848 [RENAVE/RENAVE\\_cierre\\_EDO\\_2018.pdf](https://www.isciii.es/QueHacemos/Servicios/VigilanciaSaludPublicaRENAVE/Enferme)
- 24  
25 849 4. Stephens DS. *Neisseria meningitidis*. In: Bennet JE, Dolin R, Blaser MJ, editors.  
26  
27 850 Principles and practice of infectious diseases. 9th ed. Philadelphia: Elsevier: 2585-607.
- 28  
29 851 5. Nuttens C, Findlow J, Balmer P, Swerdlow DL, Htar MTT. Evolution of meningococcal  
30  
31 852 disease epidemiology in Europe, 2008 to 2017. *Euro Surveill* 2022; 27: 2002075.
- 32  
33 853 6. Wang CB, Santoreneos R, Giles L, Ali Afzali HH, Marshall H. Case fatality rates of  
34  
35 854 invasive meningococcal disease by serogroup and age: A systematic review and meta-  
36  
37 855 analysis. *Vaccine* 2019; 37:2768-82.
- 38  
39 856 7. Beebeejaun K, Parikh SR, Campbell H, *et al*. Invasive meningococcal disease: Timing  
40  
41 857 and cause of death in England, 2008–2015. *J Infect* 2020; 80: 286-90.
- 42  
43 858 8. Loenenbach AD, van der Ende A, de Melker HE, Sanders EAM, Knol MJ. The clinical  
44  
45 859 picture and severity of invasive meningococcal disease serogroup W compared with  
46  
47 860 other serogroups in the Netherlands, 2015–2018. *Clin Infect Dis* 2020; 70:2036–44.
- 48  
49 861 9. Acevedo R, Bai X, Borrow R, *et al*. The global meningococcal initiative meeting on  
50  
51 862 prevention of meningococcal disease worldwide: epidemiology, surveillance,  
52  
53 863 hypervirulent strains, antibiotic resistance and high-risk populations. *Expert Rev*  
54  
55 864 *Vaccines* 2019; 18: 15-30.

- 1  
2  
3 865 10. Salama M, Kopel B, Jaffe J, *et al.* Surveillance of invasive meningococcal disease in the  
4  
5 866 Tel Aviv District, Israel, 2007–2017. *Vaccine* 2019; 37: 6186-91.  
6  
7 867 11. Van CP, Nguyen TT, Bui ST, *et al.* Invasive meningococcal disease remains a health  
8  
9 868 threat in Vietnam people’s army. *Infect Drug Resist* 2021; 14: 5261-9.  
10  
11 869 12. Red Nacional de Vigilancia Epidemiológica. Enfermedad meningocócica. Vigilancia de  
12  
13 870 la temporada 2017-2018. Available at:  
14  
15  
16 871 <https://www.isciii.es/QueHacemos/Servicios/VigilanciaSaludPublicaRENAVE/Enferme>  
17  
18 872 [dadesTransmisibles/Documents/archivos%20A-](https://www.isciii.es/QueHacemos/Servicios/VigilanciaSaludPublicaRENAVE/Enferme)  
19  
20 873 [Z/Enfer\\_Meningoc%C3%B3cica/RENAVE\\_EMI-2017-18.pdf](https://www.isciii.es/QueHacemos/Servicios/VigilanciaSaludPublicaRENAVE/Enferme)  
21  
22  
23 874 13. Igidbashian S, Bertizzolo I, Tognetto A, *et al.* Invasive meningococcal disease in Italy:  
24  
25 875 from analysis of national data to an evidence-based vaccination strategy. *J Prev Med*  
26  
27 876 *Hyg* 2020; 61: e152-e161.  
28  
29 877 14. Olbrich KJ, Müller D, Schumacher S, Beck E, Meszaros K, Koerber F. Systematic  
30  
31 878 review of invasive meningococcal disease: sequelae and quality of life impact on  
32  
33 879 patients and their caregivers. *Infect Dis Ther* 2018; 7: 421–38.  
34  
35 880 15. CDC Guidelines Working Group. Updated guidelines for evaluating public health  
36  
37 881 surveillance systems. *Morb Mortal Wkly Rep* 2001; 50:1–35.  
38  
39 882 16. World Health Organization. Protocol for the evaluation of epidemiological surveillance  
40  
41 883 systems. <https://apps.who.int/iris/handle/10665/63639> (Last accessed 6 September  
42  
43 884 2020).  
44  
45 885 17. Romaguera RA, German RR, Klaucke DN. Evaluating public health surveillance. In:  
46  
47 886 Teutsch SM, Churchill RE, eds. Principles and practice of public health surveillance.  
48  
49 887 New York: Oxford University Press, 2000: 176–93.  
50  
51 888 18. Generalitat de Catalunya. Decret 2013/2015, de 15 de setembre, pel qual es crea la  
52  
53 889 Xarxa de Vigilància Epidemiològica i es regulen els sistemes de notificació de malalties  
54  
55 890 de declaració obligatòria i els brots epidèmics. DOGC 2015; 6958:1-19.  
56  
57  
58  
59  
60

- 1  
2  
3 891 19. Laska EM. The use of capture-recapture methods in public health. *Bull World Health*  
4  
5 892 *Organ* 2002; 80:845.  
6  
7 893 20. Freixa Blanxart M, Guàrdia Olmos J, Honrubia Serrano ML, Però Cebollero M.  
8  
9 894 Validation of the capture –recapture method. *Psichotema* 2000; 12(Suppl 2):231-5.  
10  
11 895 21. Statistical Institute of Catalonia. Population at 1 January, 2015.  
12  
13 896 <https://www.idescat.cat/pub/?id=pmh&n=446&lang=en> (Last accessed 18 April 2022).  
14  
15 897 22. Generalitat de Catalunya. Manual de notificació per als declarants al sistema de  
16  
17 898 notificació de malalties de declaració obligatòria (MDO). 2016.  
19  
20 899 [https://canalsalut.gencat.cat/web/.content/\\_Professionals/Vigilancia\\_epidemiologica/do](https://canalsalut.gencat.cat/web/.content/_Professionals/Vigilancia_epidemiologica/documents/arxius/MANUAL_MDO_2016.pdf)  
21  
22 900 [cuments/arxius/MANUAL\\_MDO\\_2016.pdf](https://canalsalut.gencat.cat/web/.content/_Professionals/Vigilancia_epidemiologica/documents/arxius/MANUAL_MDO_2016.pdf) (Last accessed 27 January 2021).  
23  
24 901 23. Generalitat de Catalunya. Manual de procediment de notificació microbiològica  
25  
26 902 obligatòria (SNMC). 2016.  
27  
28 903 [https://canalsalut.gencat.cat/web/.content/\\_Professionals/Vigilancia\\_epidemiologica/do](https://canalsalut.gencat.cat/web/.content/_Professionals/Vigilancia_epidemiologica/do)  
29  
30 904 [cuments/arxius/manual\\_procediment.pdf](https://canalsalut.gencat.cat/web/.content/_Professionals/Vigilancia_epidemiologica/documents/arxius/manual_procediment.pdf) (last accessed 27 January 2021).  
31  
32 905 24. Ciruela P, Izquierdo C, Broner S, *et al.* Epidemiology of invasive pneumococcal disease  
33  
34 906 in Catalonia Report 2012-2016. Generalitat de Catalunya 2018.  
35  
36 907 [https://canalsalut.gencat.cat/web/.content/\\_Professionals/Vigilancia\\_epidemiologica/do](https://canalsalut.gencat.cat/web/.content/_Professionals/Vigilancia_epidemiologica/do)  
37  
38 908 [cuments/arxius/invasive\\_pneumococcal\\_2012\\_2016\\_ang.pdf](https://canalsalut.gencat.cat/web/.content/_Professionals/Vigilancia_epidemiologica/documents/arxius/invasive_pneumococcal_2012_2016_ang.pdf) (Last accessed 27 January  
39  
40 909 2021).  
41  
42 910 25. Chapman DG. Some properties of the hypergeometric distribution with applications to  
43  
44 911 zoological sample censuses. Berkeley: University of California Press, 1951.  
45  
46 912 26. Ballivet S, Salmi LR, Dubourdieu D. Capture-recapture method to determine the best  
47  
48 913 design of surveillance system. Application to a thyroid cancer registry. *Eur J Epidemiol*  
49  
50 914 2000; 16:147-53.  
51  
52 915 27. Tilling K, Sterne JAC, Wolfe CDA. Estimation of the incidence of stroke using a  
53  
54 916 capture-recapture model including covariates. *Int J Epidemiol* 2001; 30:1351-9.  
55  
56 917 28. Yee TW, Stoklosa J, Huggins RM. The VGAM package for capture-recapture data  
57  
58 918 using the conditional likelihood. *J Stat Soft* . 2015; 65: 1-33. <http://www.jstatsoft.org/>

- 1  
2  
3 919 29. Maldonado G, Greenland S. Simulation study of confounder-selection strategies. *Am J*  
4  
5 920 *Epidemiol* 1993; 138:923-36.  
6  
7 921 30. LaPorte RE, Dearwater SR, Chang Y-F, *et al.* Efficiency and accuracy of disease  
8  
9 922 monitoring systems: Applications of capture-recapture methods to injury monitoring.  
10  
11 923 *Am J Epidemiol* 1995; 142:1069-77.  
12  
13 924 31. Andrianou XD, Riccardo F, Caporali MG, *et al.* Evaluation of the national surveillance  
14  
15 925 System for invasive meningococcal disease, Italy, 2015–2018. *PLoS ONE* 16:  
16  
17 926 e0244889.  
18  
19 927 32. Baldovin T, Lazzari R, Cocchio S, *et al.* Invasive meningococcal disease in the Veneto  
20  
21 928 region of Italy: a capture-recapture analysis for assessing the effectiveness of an  
22  
23 929 integrated surveillance system. *BMJ Open* 2017; 7:e012478.  
24  
25 930 33. Jansson A, Arneborn M, Ekdahl K. Sensitivity of the Swedish statutory surveillance  
26  
27 931 system for communicable diseases 1998-2002, assessed by the capture-recapture  
28  
29 932 method. *Epidemiol Infect* 2005; 133:401-7.  
30  
31 933 34. Berghold C, Berghold A, Fülöp G, Heuberger S, Strauss R, Zenz W. Invasive  
32  
33 934 meningococcal disease in Austria 2002: assessment of completeness of notification by  
34  
35 935 comparison of two independent data sources. *Wien Klin Wochenschr* 2006; 118:31-5.  
36  
37 936 35. Gibson A, Jorm L, McIntyre P. Using linked birth, notification, hospital and mortality  
38  
39 937 data to examine false-positive meningococcal disease reporting and adjust disease  
40  
41 938 incidence estimates for children in New South Wales, Australia. *Epidemiol Infect* 2015;  
42  
43 939 143:2570-9.  
44  
45 940 36. Vázquez J A, Taha M K, Findlow J, Gupta S, Borrow R. Global Meningococcal  
46  
47 941 Initiative: guidelines for diagnosis and confirmation of invasive meningococcal disease.  
48  
49 942 *Epidemiol Infect* 2016; 144:3052-7.  
50  
51 943 37. Ratnayake R, Allard R. Challenges to the surveillance of meningococcal disease in an  
52  
53 944 era of declining incidence in Montréal, Quebec. *Can J Public Health* 2013; 104:e335–  
54  
55 945 e339.  
56  
57  
58  
59  
60

- 1  
2  
3 946 38. O'Lorcain P, Bennett DE, Morgan SL, *et al.* A retrospective assessment of the  
4  
5 947 completeness and timeliness of meningococcal disease notifications in the Republic of  
6  
7 948 Ireland over a 16-year period, 1999-2015. *Public Health* 2018; 156:44-51.  
8  
9 949 39. Carmona G, Vilaró M, Ciruela P, *et al.* Hepatitis A surveillance: sensitivity of two  
10  
11 950 information sources. *BMC Infect Dis* 2018; 18:633.  
12  
13 951 40. Gómez JA, Malbrán W, Vidal G, Seoane M, Giglio ND. Estimation of the real burden  
14  
15 952 of invasive meningococcal disease in Argentina. *Epidemiol Infect* 2019; 147: e311: 1-  
16  
17 953 10.  
18  
19  
20  
21 954  
22  
23 955 Figure 1. Venn diagram of the capture–recapture analysis of two datasets to estimate the total  
24  
25 956 number of invasive meningococcal disease cases, Catalonia 2011-2015  
26  
27  
28 957 Figure 2. Sensitivities of the SDR and MRS stratified by age groups. Catalonia 2011-2015  
29  
30  
31 958 Figure 3. Sensitivities of the SDR and MRS stratified by year of reporting, Catalonia 2011-2015  
32  
33  
34  
35  
36  
37  
38  
39  
40  
41  
42  
43  
44  
45  
46  
47  
48  
49  
50  
51  
52  
53  
54  
55  
56  
57  
58  
59  
60

Figure 1. Venn diagram of the capture–recapture analysis of two datasets to estimate the total number of invasive meningococcal disease cases, Catalonia 2011–2015



Venn diagram of the capture–recapture analysis of two datasets to estimate the total number of invasive meningococcal disease cases, Catalonia 2011–2015

189x117mm (144 x 144 DPI)

1  
2  
3  
4  
5  
6  
7  
8  
9  
10  
11  
12  
13  
14  
15  
16  
17  
18  
19  
20  
21  
22  
23  
24  
25  
26  
27  
28  
29  
30  
31  
32  
33  
34  
35  
36  
37  
38  
39  
40  
41  
42  
43  
44  
45  
46  
47  
48  
49  
50  
51  
52  
53  
54  
55  
56  
57  
58  
59  
60



Figure 2. Sensitivities of the SDR and MRS stratified by age groups. Catalonia 2011-2015

176x172mm (96 x 96 DPI)



Figure 3. Sensitivities of the SDR and MRS stratified by year of reporting, Catalonia 2011-2015

172x172mm (96 x 96 DPI)



Supplementary table 1. Capture–recapture analysis of serogroup B meningococcal invasive disease reported to the SDR and MRS stratified by different characteristics, Catalonia 2011-2015

|                                | No. records in SDR | No. records in MRS | Matched records | Calculated unreported cases | Estimated total no. of cases (95% CI) | Sensitivity SDR (%) (95% CI) | Sensitivity MRS (%) (95% CI) | Difference in sensitivities (%) | p-value          |
|--------------------------------|--------------------|--------------------|-----------------|-----------------------------|---------------------------------------|------------------------------|------------------------------|---------------------------------|------------------|
| <b>All cases</b>               | 164                | 153                | 114             | 17                          | 220 (209, 232)                        | 74.6 (68.8, 80.3)            | 69.6 (63.5, 75.6)            | 5.0                             | <b>&lt;0.001</b> |
| <b>Age group</b>               |                    |                    |                 |                             |                                       |                              |                              |                                 |                  |
| <15 years                      | 110                | 110                | 78              | 13                          | 155 (146, 165)                        | 71.0 (63.8, 78.1)            | 71.0 (63.8, 78.1)            | 0.0                             | 0.656            |
| ≥15 years                      | 53                 | 42                 | 35              | 4                           | 64 (59, 69)                           | 83.5 (74.3, 92.6)            | 66.1 (54.5, 77.8)            | 17.3                            |                  |
| <b>Sex</b>                     |                    |                    |                 |                             |                                       |                              |                              |                                 |                  |
| Male                           | 86                 | 76                 | 62              | 6                           | 106 (100, 112)                        | 81.7 (74.3, 89.1)            | 72.2 (63.6, 80.7)            | 9.5                             | 0.099            |
| Female                         | 78                 | 77                 | 52              | 13                          | 116 (106, 126)                        | 67.7 (59.1, 76.2)            | 66.8 (58.2, 75.4)            | 0.9                             |                  |
| <b>Year of report</b>          |                    |                    |                 |                             |                                       |                              |                              |                                 |                  |
| 2011-2013                      | 95                 | 91                 | 60              | 18                          | 144 (132, 157)                        | 66.1 (58.3, 73.8)            | 63.3 (55.4, 71.2)            | 2.8                             | 0.002            |
| 2014-2015                      | 69                 | 62                 | 54              | 3                           | 80 (76, 83)                           | 87.1 (79.7, 94.5)            | 78.3 (69.2, 87.4)            | 8.8                             |                  |
| <b>Size of municipality</b>    |                    |                    |                 |                             |                                       |                              |                              |                                 |                  |
| <10,000 people                 | 22                 | 24                 | 20              | 1                           | 27 (26, 28)                           | 83.3 (69.1, 97.6)            | 90.9 (79.9, 100.0)           | -7.6                            | 0.059            |
| ≥10,000 people                 | 137                | 114                | 91              | 12                          | 172 (163, 181)                        | 79.9 (73.9, 85.9)            | 66.5 (59.4, 73.5)            | 13.4                            |                  |
| <b>Country of birth</b>        |                    |                    |                 |                             |                                       |                              |                              |                                 |                  |
| Spain                          | 152                | 144                | 107             | 16                          | 205 (194, 215)                        | 74.4 (68.4, 80.4)            | 70.4 (64.2, 76.7)            | 3.9                             | 0.631            |
| Other countries                | 12                 | 9                  | 7               | 2                           | 16 (13, 19)                           | 78.9 (58.4, 99.5)            | 59.2 (34.5, 83.9)            | 19.7                            |                  |
| <b>Number of hospital beds</b> |                    |                    |                 |                             |                                       |                              |                              |                                 |                  |
| <200                           | 49                 | 52                 | 33              | 9                           | 77 (69, 86)                           | 63.7 (53.0, 74.5)            | 67.6 (57.2, 78.1)            | -3.9                            | 0.095            |

|                                 |     |     |     |    |                |                   |                   |      |              |
|---------------------------------|-----|-----|-----|----|----------------|-------------------|-------------------|------|--------------|
| <b>&gt;=200</b>                 | 113 | 101 | 81  | 8  | 141 (134, 148) | 80.3 (73.7, 86.8) | 71.7 (64.3, 79.2) | 8.5  |              |
| <b>Clinical form</b>            |     |     |     |    |                |                   |                   |      |              |
| <b>Meningitis</b>               | 91  | 100 | 70  | 9  | 130 (122, 138) | 70.1 (62.2, 77.9) | 77.0 (69.7, 84.2) | -6.9 | <i>0.972</i> |
| <b>Septicaemia</b>              | 66  | 51  | 43  | 5  | 79 (73, 84)    | 84.4 (76.4, 92.4) | 65.2 (54.7, 75.8) | 19.2 |              |
| <b>Type of reporting centre</b> |     |     |     |    |                |                   |                   |      |              |
| <b>Private</b>                  | 14  | 1   | 1   | 0  | 14 (14, 14)    | 100 (100, 100)    | 7.1 (-6.4, 20.6)  | 92.9 | <i>0.004</i> |
| <b>Public</b>                   | 149 | 152 | 113 | 13 | 201 (192, 210) | 74.4 (68.4, 80.4) | 75.9 (70, 81.8)   | -1.5 |              |

SDR: Statutory disease reporting; MDR: Microbiological reporting system

**Supplementary table 2. Capture–recapture analysis of serogroup C meningococcal invasive disease reported to the SDR and MRS stratified by different characteristics, Catalonia 2011-2015**

|                                | No. records in SDR | No. records in MRS | Matched records | Calculated unreported cases | Estimated total no. of cases (95% CI) | Sensitivity SDR (%) (95% CI) | Sensitivity MRS (%) (95% CI) | Difference in sensitivities (%) | <i>p</i> -value |
|--------------------------------|--------------------|--------------------|-----------------|-----------------------------|---------------------------------------|------------------------------|------------------------------|---------------------------------|-----------------|
| <b>All cases</b>               | 26                 | 21                 | 16              | 3                           | 34 (30, 39)                           | 76.7 (62.5, 90.9)            | 62.0 (45.6, 78.3)            | 14.8                            | <b>0.035</b>    |
| <b>Age group</b>               |                    |                    |                 |                             |                                       |                              |                              |                                 |                 |
| <15 years                      | 4                  | 4                  | 4               | 0                           | 4 (4, 4)                              | 100.0 (100.0, 100.0)         | 100.0 (100.0, 100.0)         | 0.0                             | 0.992           |
| ≥15 years                      | 22                 | 17                 | 12              | 4                           | 31 (25, 37)                           | 71.4 (55.5, 87.4)            | 55.2 (37.6, 72.8)            | 16.2                            |                 |
| <b>Sex</b>                     |                    |                    |                 |                             |                                       |                              |                              |                                 |                 |
| Male                           | 13                 | 11                 | 7               | 3                           | 20 (15, 26)                           | 65.0 (44.1, 85.9)            | 55.0 (33.2, 76.8)            | 10.0                            | 0.368           |
| Female                         | 13                 | 10                 | 9               | 1                           | 15 (13, 16)                           | 90.3 (75.0, 100.0)           | 69.4 (45.7, 93.2)            | 20.8                            |                 |
| <b>Year of report</b>          |                    |                    |                 |                             |                                       |                              |                              |                                 |                 |
| 2011-2013                      | 12                 | 10                 | 6               | 4                           | 20 (14, 26)                           | 61.9 (40.2, 83.5)            | 51.6 (29.3, 73.8)            | 10.3                            | 0.110           |
| 2014-2015                      | 14                 | 11                 | 10              | 1                           | 16 (14, 17)                           | 90.9 (76.6, 100.0)           | 71.4 (48.9, 94.0)            | 19.5                            |                 |
| <b>Size of municipality</b>    |                    |                    |                 |                             |                                       |                              |                              |                                 |                 |
| <10,000 people                 | 3                  | 2                  | 2               | 0                           | 3 (3, 3)                              | 100.0 (100.0, 100.0)         | 66.7 (13.3, 100.0)           | 33.3                            | 0.591           |
| ≥10,000 people                 | 21                 | 15                 | 12              | 3                           | 27 (23, 30)                           | 80.5 (65.3, 95.7)            | 57.5 (38.5, 76.4)            | 23.0                            |                 |
| <b>Country of birth</b>        |                    |                    |                 |                             |                                       |                              |                              |                                 |                 |
| Spain                          | 22                 | 19                 | 14              | 3                           | 30 (26, 35)                           | 74.1 (58.3, 89.8)            | 64.0 (46.7, 81.2)            | 10.1                            | 0.945           |
| Other countries                | 4                  | 2                  | 2               | 0                           | 4 (4, 4)                              | 100.0 (100.0, 100.0)         | 50.0 (1.0, 99.0)             | 50.0                            |                 |
| <b>Number of hospital beds</b> |                    |                    |                 |                             |                                       |                              |                              |                                 |                 |

|                                 |    |    |    |   |             |                      |                    |      |              |
|---------------------------------|----|----|----|---|-------------|----------------------|--------------------|------|--------------|
| <b>&lt;200</b>                  | 7  | 5  | 5  | 0 | 7 (7, 7)    | 100.0 (100.0, 100.0) | 71.4 (38.0, 104.9) | 28.6 | <i>0.283</i> |
| <b>≥200</b>                     | 18 | 16 | 11 | 3 | 26 (22, 31) | 69.5 (51.8, 87.2)    | 61.8 (43.1, 80.5)  | 7.7  |              |
| <b>Clinical form</b>            |    |    |    |   |             |                      |                    |      |              |
| <b>Meningitis</b>               | 16 | 16 | 11 | 3 | 24 (20, 27) | 69.3 (50.4, 88.1)    | 69.3 (50.4, 88.1)  | 0.0  | <i>0.908</i> |
| <b>Septicaemia</b>              | 8  | 4  | 4  | 0 | 8 (8, 8)    | 100.0 (100.0, 100.0) | 50.0 (15.4, 84.7)  | 50.0 |              |
| <b>Type of reporting centre</b> |    |    |    |   |             |                      |                    |      |              |
| <b>Private</b>                  | 4  | 0  | 0  | 0 | 4 (4, 4)    | 100.0 (100.0, 100.0) | 0 (0.0, 0.0)       | 100  | <i>0.992</i> |
| <b>Public</b>                   | 22 | 21 | 16 | 2 | 29 (26, 33) | 76.4 (60.9, 91.9)    | 72.9 (56.7, 89.2)  | 3.5  |              |

SDR: Statutory disease reporting; MDR: Microbiological reporting system

Supplementary table 3. Capture–recapture analysis of all deaths due to meningococcal invasive disease reported to the SDR and MRS stratified by different characteristics, Catalonia 2011-2015

|                                | No. records in SDR | No. records in MRS | Matched records | Calculated unreported cases | Estimated total no. of cases (95% CI) | Sensitivity SDR (%) (95% CI) | Sensitivity MRS (%) (95% CI) | Difference in sensitivities (%) | p-value |
|--------------------------------|--------------------|--------------------|-----------------|-----------------------------|---------------------------------------|------------------------------|------------------------------|---------------------------------|---------|
| <b>All cases</b>               | 22                 | 11                 | 11              | 0                           | 22 (22, 22)                           | 100.0 (100.0, 100.0)         | 50.0 (29.1, 70.9)            | 50.0                            | 0.104   |
| <b>Age group</b>               |                    |                    |                 |                             |                                       |                              |                              |                                 |         |
| <15 years                      | 6                  | 4                  | 4               | 0                           | 6 (6, 6)                              | 100.0 (100.0, 100.0)         | 66.7 (28.9, 100.0)           | 33.3                            | 0.346   |
| ≥15 years                      | 16                 | 7                  | 7               | 0                           | 16 (16, 16)                           | 100.0 (100.0, 100.0)         | 43.8 (19.4, 68.1)            | 56.3                            |         |
| <b>Sex</b>                     |                    |                    |                 |                             |                                       |                              |                              |                                 |         |
| Male                           | 16                 | 7                  | 7               | 0                           | 16 (16, 16)                           | 100.0 (100.0, 100.0)         | 43.8 (19.4, 68.1)            | 56.2                            | 0.346   |
| Female                         | 6                  | 4                  | 4               | 0                           | 6 (6, 6)                              | 100.0 (100.0, 100.0)         | 66.7 (29.0, 100.0)           | 33.3                            |         |
| <b>Year of report</b>          |                    |                    |                 |                             |                                       |                              |                              |                                 |         |
| 2011-2013                      | 16                 | 6                  | 6               | 0                           | 16 (16, 16)                           | 100.0 (100.0, 100.0)         | 31.3 (8.5, 54.0)             | 68.8                            | 0.080   |
| 2014-2015                      | 6                  | 5                  | 5               | 0                           | 6 (6, 6)                              | 100.0 (100.0, 100.0)         | 83.3 (53.5, 100.0)           | 16.7                            |         |
| <b>Size of municipality</b>    |                    |                    |                 |                             |                                       |                              |                              |                                 |         |
| <10,000 people                 | 3                  | 3                  | 3               | 0                           | 3 (3, 3)                              | 100.0 (100.0, 100.0)         | 100.0 (100.0, 100.0)         | 0.0                             | 0.991   |
| ≥10,000 people                 | 19                 | 8                  | 8               | 0                           | 19 (19, 19)                           | 100.0 (100.0, 100.0)         | 42.1 (19.9, 64.3)            | 57.9                            |         |
| <b>Country of birth</b>        |                    |                    |                 |                             |                                       |                              |                              |                                 |         |
| Spain                          | 20                 | 10                 | 10              | 0                           | 20 (20, 20)                           | 100.0 (100.0, 100.0)         | 50.0 (28.1, 71.9)            | 50.0                            | 1.000   |
| Other countries                | 2                  | 1                  | 1               | 0                           | 2 (2, 2)                              | 100.0 (100.0, 100.0)         | 50.0 (0.0, 100.0)            | 50.0                            |         |
| <b>Number of hospital beds</b> |                    |                    |                 |                             |                                       |                              |                              |                                 |         |
| <200                           | 4                  | 2                  | 2               | 0                           | 4 (4, 4)                              | 100.0 (100.0, 100.0)         | 50.0 (1.0, 99.0)             | 50.0                            | 0.822   |
| ≥200                           | 16                 | 9                  | 9               | 0                           | 16 (16, 16)                           | 100.0 (100.0, 100.0)         | 56.3 (31.9, 80.6)            | 43.7                            |         |
| <b>Clinical form</b>           |                    |                    |                 |                             |                                       |                              |                              |                                 |         |
| Meningitis                     | 7                  | 4                  | 4               | 0                           | 7 (7, 7)                              | 100.0 (100.0, 100.0)         | 57.1 (20.5, 93.8)            | 42.9                            | 0.648   |
| Septicaemia                    | 15                 | 7                  | 7               | 0                           | 15 (15, 15)                           | 100.0 (100.0, 100.0)         | 46.7 (21.4, 71.9)            | 53.3                            |         |

|                                 |    |    |    |   |             |                      |                   |      |       |
|---------------------------------|----|----|----|---|-------------|----------------------|-------------------|------|-------|
| <b>Type of reporting centre</b> |    |    |    |   |             |                      |                   |      |       |
| <b>Private</b>                  | 2  | 0  | 0  | 0 | 2 (2, 2)    | 100.0 (100.0, 100.0) | 0 (0.0, 0.0)      | 100  | 0.992 |
| <b>Public</b>                   | 20 | 11 | 11 | 0 | 20 (20, 20) | 100.0 (100.0, 100.0) | 55 (33.2, 76.8)   | 45   |       |
| <b>Serogrup</b>                 |    |    |    |   |             |                      |                   |      |       |
| <b>B</b>                        | 17 | 9  | 9  | 0 | 17 (17, 17) | 100.0 (100.0, 100.0) | 52.9 (29.2, 76.7) | 47.1 | 0.332 |
| <b>C</b>                        | 4  | 1  | 1  | 0 | 4 (4, 4)    | 100.0 (100.0, 100.0) | 25.0 (0.0, 67.4)  | 75.0 |       |

SDR: Statutory disease reporting; MDR: Microbiological reporting system

## STROBE Statement—checklist of items that should be included in reports of observational studies

|                              | Item No | Recommendation                                                                                                                                                                                                                                                                                                                                                                                                                                                         | Page No |
|------------------------------|---------|------------------------------------------------------------------------------------------------------------------------------------------------------------------------------------------------------------------------------------------------------------------------------------------------------------------------------------------------------------------------------------------------------------------------------------------------------------------------|---------|
| <b>Title and abstract</b>    | 1       | (a) Indicate the study's design with a commonly used term in the title or the abstract                                                                                                                                                                                                                                                                                                                                                                                 | 1       |
|                              |         | (b) Provide in the abstract an informative and balanced summary of what was done and what was found                                                                                                                                                                                                                                                                                                                                                                    | 5       |
| <b>Introduction</b>          |         |                                                                                                                                                                                                                                                                                                                                                                                                                                                                        |         |
| Background/rationale         | 2       | Explain the scientific background and rationale for the investigation being reported                                                                                                                                                                                                                                                                                                                                                                                   | 6       |
| Objectives                   | 3       | State specific objectives, including any prespecified hypotheses                                                                                                                                                                                                                                                                                                                                                                                                       | 7       |
| <b>Methods</b>               |         |                                                                                                                                                                                                                                                                                                                                                                                                                                                                        |         |
| Study design                 | 4       | Present key elements of study design early in the paper                                                                                                                                                                                                                                                                                                                                                                                                                | 7       |
| Setting                      | 5       | Describe the setting, locations, and relevant dates, including periods of recruitment, exposure, follow-up, and data collection                                                                                                                                                                                                                                                                                                                                        | 7,8     |
| Participants                 | 6       | (a) <i>Cohort study</i> —Give the eligibility criteria, and the sources and methods of selection of participants. Describe methods of follow-up<br><i>Case-control study</i> —Give the eligibility criteria, and the sources and methods of case ascertainment and control selection. Give the rationale for the choice of cases and controls<br><i>Cross-sectional study</i> —Give the eligibility criteria, and the sources and methods of selection of participants | 7,8     |
|                              |         | (b) <i>Cohort study</i> —For matched studies, give matching criteria and number of exposed and unexposed<br><i>Case-control study</i> —For matched studies, give matching criteria and the number of controls per case                                                                                                                                                                                                                                                 |         |
| Variables                    | 7       | Clearly define all outcomes, exposures, predictors, potential confounders, and effect modifiers. Give diagnostic criteria, if applicable                                                                                                                                                                                                                                                                                                                               | 8,9     |
| Data sources/<br>measurement | 8*      | For each variable of interest, give sources of data and details of methods of assessment (measurement). Describe comparability of assessment methods if there is more than one group                                                                                                                                                                                                                                                                                   | 8,9     |
| Bias                         | 9       | Describe any efforts to address potential sources of bias                                                                                                                                                                                                                                                                                                                                                                                                              | 9       |
| Study size                   | 10      | Explain how the study size was arrived at                                                                                                                                                                                                                                                                                                                                                                                                                              | 8       |
| Quantitative<br>variables    | 11      | Explain how quantitative variables were handled in the analyses. If applicable, describe which groupings were chosen and why                                                                                                                                                                                                                                                                                                                                           | 8       |
| Statistical methods          | 12      | (a) Describe all statistical methods, including those used to control for confounding                                                                                                                                                                                                                                                                                                                                                                                  | 8,9     |
|                              |         | (b) Describe any methods used to examine subgroups and interactions                                                                                                                                                                                                                                                                                                                                                                                                    |         |
|                              |         | (c) Explain how missing data were addressed                                                                                                                                                                                                                                                                                                                                                                                                                            |         |
|                              |         | (d) <i>Cohort study</i> —If applicable, explain how loss to follow-up was addressed<br><i>Case-control study</i> —If applicable, explain how matching of cases and controls was addressed<br><i>Cross-sectional study</i> —If applicable, describe analytical methods taking account of sampling strategy                                                                                                                                                              |         |
|                              |         | (e) Describe any sensitivity analyses                                                                                                                                                                                                                                                                                                                                                                                                                                  |         |

Continued on next page

| <b>Results</b>           |     |                                                                                                                                                                                                                                                                                                                                                                                                               |          |
|--------------------------|-----|---------------------------------------------------------------------------------------------------------------------------------------------------------------------------------------------------------------------------------------------------------------------------------------------------------------------------------------------------------------------------------------------------------------|----------|
| Participants             | 13* | (a) Report numbers of individuals at each stage of study—eg numbers potentially eligible, examined for eligibility, confirmed eligible, included in the study, completing follow-up, and analysed<br>(b) Give reasons for non-participation at each stage<br>(c) Consider use of a flow diagram                                                                                                               | 10       |
| Descriptive data         | 14* | (a) Give characteristics of study participants (eg demographic, clinical, social) and information on exposures and potential confounders<br>(b) Indicate number of participants with missing data for each variable of interest<br>(c) <i>Cohort study</i> —Summarise follow-up time (eg, average and total amount)                                                                                           | 10       |
| Outcome data             | 15* | <i>Cohort study</i> —Report numbers of outcome events or summary measures over time<br><i>Case-control study</i> —Report numbers in each exposure category, or summary measures of exposure<br><i>Cross-sectional study</i> —Report numbers of outcome events or summary measures                                                                                                                             | 10       |
| Main results             | 16  | (a) Give unadjusted estimates and, if applicable, confounder-adjusted estimates and their precision (eg, 95% confidence interval). Make clear which confounders were adjusted for and why they were included<br>(b) Report category boundaries when continuous variables were categorized<br>(c) If relevant, consider translating estimates of relative risk into absolute risk for a meaningful time period | 10,11,12 |
| Other analyses           | 17  | Report other analyses done—eg analyses of subgroups and interactions, and sensitivity analyses                                                                                                                                                                                                                                                                                                                |          |
| <b>Discussion</b>        |     |                                                                                                                                                                                                                                                                                                                                                                                                               |          |
| Key results              | 18  | Summarise key results with reference to study objectives                                                                                                                                                                                                                                                                                                                                                      | 12,13    |
| Limitations              | 19  | Discuss limitations of the study, taking into account sources of potential bias or imprecision. Discuss both direction and magnitude of any potential bias                                                                                                                                                                                                                                                    | 15       |
| Interpretation           | 20  | Give a cautious overall interpretation of results considering objectives, limitations, multiplicity of analyses, results from similar studies, and other relevant evidence                                                                                                                                                                                                                                    | 14       |
| Generalisability         | 21  | Discuss the generalisability (external validity) of the study results                                                                                                                                                                                                                                                                                                                                         | 5,14,15  |
| <b>Other information</b> |     |                                                                                                                                                                                                                                                                                                                                                                                                               |          |
| Funding                  | 22  | Give the source of funding and the role of the funders for the present study and, if applicable, for the original study on which the present article is based                                                                                                                                                                                                                                                 | 16       |

\*Give information separately for cases and controls in case-control studies and, if applicable, for exposed and unexposed groups in cohort and cross-sectional studies.

**Note:** An Explanation and Elaboration article discusses each checklist item and gives methodological background and published examples of transparent reporting. The STROBE checklist is best used in conjunction with this article (freely available on the Web sites of PLoS Medicine at <http://www.plosmedicine.org/>, Annals of Internal Medicine at <http://www.annals.org/>, and Epidemiology at <http://www.epidem.com/>). Information on the STROBE Initiative is available at [www.strobe-statement.org](http://www.strobe-statement.org).
