# Supplementary material for: Estimation of the incidence of invasive meningococcal disease using a capture–recapture model based on two independent surveillance systems in Catalonia, Spain
Source: PubMed Central journal article supplement — BMJ Open. 2022 Jun 21;12(6):e058003. doi: 10.1136/bmjopen-2021-058003 (PMC9214402; doi:10.1136/bmjopen-2021-058003), 2022-06-21
Supplement: bmjopen-2021-058003supp001.pdf [file bmjopen-2021-058003supp001.pdf]

**Supplementary table 1. Capture–recapture analysis of serogroup B meningococcal invasive disease reported to the SDR and MRS stratified by different characteristics, Catalonia 2011–2015**

|                                | No. records in SDR | No. records in MRS | Matched records | Calculated unreported cases | Estimated total no. of cases (95% CI) | Sensitivity SDR (%) (95% CI) | Sensitivity MRS (%) (95% CI) | Difference in sensitivities (%) | p-value          |
|--------------------------------|--------------------|--------------------|-----------------|-----------------------------|---------------------------------------|------------------------------|------------------------------|---------------------------------|------------------|
| <b>All cases</b>               | 164                | 153                | 114             | 17                          | 220 (209, 232)                        | 74.6 (68.8, 80.3)            | 69.6 (63.5, 75.6)            | 5.0                             | <b>&lt;0.001</b> |
| <b>Age group</b>               |                    |                    |                 |                             |                                       |                              |                              |                                 |                  |
| <15 years                      | 110                | 110                | 78              | 13                          | 155 (146, 165)                        | 71.0 (63.8, 78.1)            | 71.0 (63.8, 78.1)            | 0.0                             | 0.656            |
| ≥15 years                      | 53                 | 42                 | 35              | 4                           | 64 (59, 69)                           | 83.5 (74.3, 92.6)            | 66.1 (54.5, 77.8)            | 17.3                            |                  |
| <b>Sex</b>                     |                    |                    |                 |                             |                                       |                              |                              |                                 |                  |
| Male                           | 86                 | 76                 | 62              | 6                           | 106 (100, 112)                        | 81.7 (74.3, 89.1)            | 72.2 (63.6, 80.7)            | 9.5                             | 0.099            |
| Female                         | 78                 | 77                 | 52              | 13                          | 116 (106, 126)                        | 67.7 (59.1, 76.2)            | 66.8 (58.2, 75.4)            | 0.9                             |                  |
| <b>Year of report</b>          |                    |                    |                 |                             |                                       |                              |                              |                                 |                  |
| 2011–2013                      | 95                 | 91                 | 60              | 18                          | 144 (132, 157)                        | 66.1 (58.3, 73.8)            | 63.3 (55.4, 71.2)            | 2.8                             | <b>0.002</b>     |
| 2014–2015                      | 69                 | 62                 | 54              | 3                           | 80 (76, 83)                           | 87.1 (79.7, 94.5)            | 78.3 (69.2, 87.4)            | 8.8                             |                  |
| <b>Size of municipality</b>    |                    |                    |                 |                             |                                       |                              |                              |                                 |                  |
| <10,000 people                 | 22                 | 24                 | 20              | 1                           | 27 (26, 28)                           | 83.3 (69.1, 97.6)            | 90.9 (79.9, 100.0)           | -7.6                            | 0.059            |
| ≥10,000 people                 | 137                | 114                | 91              | 12                          | 172 (163, 181)                        | 79.9 (73.9, 85.9)            | 66.5 (59.4, 73.5)            | 13.4                            |                  |
| <b>Country of birth</b>        |                    |                    |                 |                             |                                       |                              |                              |                                 |                  |
| Spain                          | 152                | 144                | 107             | 16                          | 205 (194, 215)                        | 74.4 (68.4, 80.4)            | 70.4 (64.2, 76.7)            | 3.9                             | 0.631            |
| Other countries                | 12                 | 9                  | 7               | 2                           | 16 (13, 19)                           | 78.9 (58.4, 99.5)            | 59.2 (34.5, 83.9)            | 19.7                            |                  |
| <b>Number of hospital beds</b> |                    |                    |                 |                             |                                       |                              |                              |                                 |                  |
| <200                           | 49                 | 52                 | 33              | 9                           | 77 (69, 86)                           | 63.7 (53.0, 74.5)            | 67.6 (57.2, 78.1)            | -3.9                            | 0.095            |

|                                 |     |     |     |    |                |                   |                   |      |       |
|---------------------------------|-----|-----|-----|----|----------------|-------------------|-------------------|------|-------|
| <b>&gt;=200</b>                 | 113 | 101 | 81  | 8  | 141 (134, 148) | 80.3 (73.7, 86.8) | 71.7 (64.3, 79.2) | 8.5  |       |
| <b>Clinical form</b>            |     |     |     |    |                |                   |                   |      |       |
| <b>Meningitis</b>               | 91  | 100 | 70  | 9  | 130 (122, 138) | 70.1 (62.2, 77.9) | 77.0 (69.7, 84.2) | -6.9 | 0.972 |
| <b>Septicaemia</b>              | 66  | 51  | 43  | 5  | 79 (73, 84)    | 84.4 (76.4, 92.4) | 65.2 (54.7, 75.8) | 19.2 |       |
| <b>Type of reporting centre</b> |     |     |     |    |                |                   |                   |      |       |
| <b>Private</b>                  | 14  | 1   | 1   | 0  | 14 (14, 14)    | 100 (100, 100)    | 7.1 (-6.4, 20.6)  | 92.9 | 0.004 |
| <b>Public</b>                   | 149 | 152 | 113 | 13 | 201 (192, 210) | 74.4 (68.4, 80.4) | 75.9 (70, 81.8)   | -1.5 |       |

SDR: Statutory disease reporting; MDR: Microbiological reporting system

Supplementary table 2. Capture–recapture analysis of serogroup C meningococcal invasive disease reported to the SDR and MRS stratified by different characteristics, Catalonia 2011-2015

|                                | No. records in SDR | No. records in MRS | Matched records | Calculated unreported cases | Estimated total no. of cases (95% CI) | Sensitivity SDR (%) (95% CI) | Sensitivity MRS (%) (95% CI) | Difference in sensitivities (%) | p-value      |
|--------------------------------|--------------------|--------------------|-----------------|-----------------------------|---------------------------------------|------------------------------|------------------------------|---------------------------------|--------------|
| <b>All cases</b>               | 26                 | 21                 | 16              | 3                           | 34 (30, 39)                           | 76.7 (62.5, 90.9)            | 62.0 (45.6, 78.3)            | 14.8                            | <b>0.035</b> |
| <b>Age group</b>               |                    |                    |                 |                             |                                       |                              |                              |                                 |              |
| <15 years                      | 4                  | 4                  | 4               | 0                           | 4 (4, 4)                              | 100.0 (100.0, 100.0)         | 100.0 (100.0, 100.0)         | 0.0                             | 0.992        |
| ≥15 years                      | 22                 | 17                 | 12              | 4                           | 31 (25, 37)                           | 71.4 (55.5, 87.4)            | 55.2 (37.6, 72.8)            | 16.2                            |              |
| <b>Sex</b>                     |                    |                    |                 |                             |                                       |                              |                              |                                 |              |
| Male                           | 13                 | 11                 | 7               | 3                           | 20 (15, 26)                           | 65.0 (44.1, 85.9)            | 55.0 (33.2, 76.8)            | 10.0                            | 0.368        |
| Female                         | 13                 | 10                 | 9               | 1                           | 15 (13, 16)                           | 90.3 (75.0, 100.0)           | 69.4 (45.7, 93.2)            | 20.8                            |              |
| <b>Year of report</b>          |                    |                    |                 |                             |                                       |                              |                              |                                 |              |
| 2011-2013                      | 12                 | 10                 | 6               | 4                           | 20 (14, 26)                           | 61.9 (40.2, 83.5)            | 51.6 (29.3, 73.8)            | 10.3                            | 0.110        |
| 2014-2015                      | 14                 | 11                 | 10              | 1                           | 16 (14, 17)                           | 90.9 (76.6, 100.0)           | 71.4 (48.9, 94.0)            | 19.5                            |              |
| <b>Size of municipality</b>    |                    |                    |                 |                             |                                       |                              |                              |                                 |              |
| <10,000 people                 | 3                  | 2                  | 2               | 0                           | 3 (3, 3)                              | 100.0 (100.0, 100.0)         | 66.7 (13.3, 100.0)           | 33.3                            | 0.591        |
| ≥10,000 people                 | 21                 | 15                 | 12              | 3                           | 27 (23, 30)                           | 80.5 (65.3, 95.7)            | 57.5 (38.5, 76.4)            | 23.0                            |              |
| <b>Country of birth</b>        |                    |                    |                 |                             |                                       |                              |                              |                                 |              |
| Spain                          | 22                 | 19                 | 14              | 3                           | 30 (26, 35)                           | 74.1 (58.3, 89.8)            | 64.0 (46.7, 81.2)            | 10.1                            | 0.945        |
| Other countries                | 4                  | 2                  | 2               | 0                           | 4 (4, 4)                              | 100.0 (100.0, 100.0)         | 50.0 (1.0, 99.0)             | 50.0                            |              |
| <b>Number of hospital beds</b> |                    |                    |                 |                             |                                       |                              |                              |                                 |              |

|                                 |    |    |    |   |             |                      |                    |      |       |
|---------------------------------|----|----|----|---|-------------|----------------------|--------------------|------|-------|
| <b>&lt;200</b>                  | 7  | 5  | 5  | 0 | 7 (7, 7)    | 100.0 (100.0, 100.0) | 71.4 (38.0, 104.9) | 28.6 | 0.283 |
| <b>≥200</b>                     | 18 | 16 | 11 | 3 | 26 (22, 31) | 69.5 (51.8, 87.2)    | 61.8 (43.1, 80.5)  | 7.7  |       |
| <b>Clinical form</b>            |    |    |    |   |             |                      |                    |      |       |
| <b>Meningitis</b>               | 16 | 16 | 11 | 3 | 24 (20, 27) | 69.3 (50.4, 88.1)    | 69.3 (50.4, 88.1)  | 0.0  | 0.908 |
| <b>Septicaemia</b>              | 8  | 4  | 4  | 0 | 8 (8, 8)    | 100.0 (100.0, 100.0) | 50.0 (15.4, 84.7)  | 50.0 |       |
| <b>Type of reporting centre</b> |    |    |    |   |             |                      |                    |      |       |
| <b>Private</b>                  | 4  | 0  | 0  | 0 | 4 (4, 4)    | 100.0 (100.0, 100.0) | 0 (0.0, 0.0)       | 100  | 0.992 |
| <b>Public</b>                   | 22 | 21 | 16 | 2 | 29 (26, 33) | 76.4 (60.9, 91.9)    | 72.9 (56.7, 89.2)  | 3.5  |       |

SDR: Statutory disease reporting; MDR: Microbiological reporting system

**Supplementary table 3. Capture–recapture analysis of all deaths due to meningococcal invasive disease reported to the SDR and MRS stratified by different characteristics, Catalonia 2011-2015**

|                                | No. records in SDR | No. records in MRS | Matched records | Calculated unreported cases | Estimated total no. of cases (95% CI) | Sensitivity SDR (%) (95% CI) | Sensitivity MRS (%) (95% CI) | Difference in sensitivities (%) | p-value |
|--------------------------------|--------------------|--------------------|-----------------|-----------------------------|---------------------------------------|------------------------------|------------------------------|---------------------------------|---------|
| <b>All cases</b>               | 22                 | 11                 | 11              | 0                           | 22 (22, 22)                           | 100.0 (100.0, 100.0)         | 50.0 (29.1, 70.9)            | 50.0                            | 0.104   |
| <b>Age group</b>               |                    |                    |                 |                             |                                       |                              |                              |                                 |         |
| <15 years                      | 6                  | 4                  | 4               | 0                           | 6 (6, 6)                              | 100.0 (100.0, 100.0)         | 66.7 (28.9, 100.0)           | 33.3                            | 0.346   |
| ≥15 years                      | 16                 | 7                  | 7               | 0                           | 16 (16, 16)                           | 100.0 (100.0, 100.0)         | 43.8 (19.4, 68.1)            | 56.3                            |         |
| <b>Sex</b>                     |                    |                    |                 |                             |                                       |                              |                              |                                 |         |
| Male                           | 16                 | 7                  | 7               | 0                           | 16 (16, 16)                           | 100.0 (100.0, 100.0)         | 43.8 (19.4, 68.1)            | 56.2                            | 0.346   |
| Female                         | 6                  | 4                  | 4               | 0                           | 6 (6, 6)                              | 100.0 (100.0, 100.0)         | 66.7 (29.0, 100.0)           | 33.3                            |         |
| <b>Year of report</b>          |                    |                    |                 |                             |                                       |                              |                              |                                 |         |
| 2011-2013                      | 16                 | 6                  | 6               | 0                           | 16 (16, 16)                           | 100.0 (100.0, 100.0)         | 31.3 (8.5, 54.0)             | 68.8                            | 0.080   |
| 2014-2015                      | 6                  | 5                  | 5               | 0                           | 6 (6, 6)                              | 100.0 (100.0, 100.0)         | 83.3 (53.5, 100.0)           | 16.7                            |         |
| <b>Size of municipality</b>    |                    |                    |                 |                             |                                       |                              |                              |                                 |         |
| <10,000 people                 | 3                  | 3                  | 3               | 0                           | 3 (3, 3)                              | 100.0 (100.0, 100.0)         | 100.0 (100.0, 100.0)         | 0.0                             | 0.991   |
| ≥10,000 people                 | 19                 | 8                  | 8               | 0                           | 19 (19, 19)                           | 100.0 (100.0, 100.0)         | 42.1 (19.9, 64.3)            | 57.9                            |         |
| <b>Country of birth</b>        |                    |                    |                 |                             |                                       |                              |                              |                                 |         |
| Spain                          | 20                 | 10                 | 10              | 0                           | 20 (20, 20)                           | 100.0 (100.0, 100.0)         | 50.0 (28.1, 71.9)            | 50.0                            | 1.000   |
| Other countries                | 2                  | 1                  | 1               | 0                           | 2 (2, 2)                              | 100.0 (100.0, 100.0)         | 50.0 (0.0, 100.0)            | 50.0                            |         |
| <b>Number of hospital beds</b> |                    |                    |                 |                             |                                       |                              |                              |                                 |         |
| <200                           | 4                  | 2                  | 2               | 0                           | 4 (4, 4)                              | 100.0 (100.0, 100.0)         | 50.0 (1.0, 99.0)             | 50.0                            | 0.822   |
| ≥200                           | 16                 | 9                  | 9               | 0                           | 16 (16, 16)                           | 100.0 (100.0, 100.0)         | 56.3 (31.9, 80.6)            | 43.7                            |         |
| <b>Clinical form</b>           |                    |                    |                 |                             |                                       |                              |                              |                                 |         |
| Meningitis                     | 7                  | 4                  | 4               | 0                           | 7 (7, 7)                              | 100.0 (100.0, 100.0)         | 57.1 (20.5, 93.8)            | 42.9                            | 0.648   |
| Septicaemia                    | 15                 | 7                  | 7               | 0                           | 15 (15, 15)                           | 100.0 (100.0, 100.0)         | 46.7 (21.4, 71.9)            | 53.3                            |         |

|                                 |    |    |    |   |             |                      |                   |      |       |
|---------------------------------|----|----|----|---|-------------|----------------------|-------------------|------|-------|
| <b>Type of reporting centre</b> |    |    |    |   |             |                      |                   |      |       |
| <b>Private</b>                  | 2  | 0  | 0  | 0 | 2 (2, 2)    | 100.0 (100.0, 100.0) | 0 (0.0, 0.0)      | 100  | 0.992 |
| <b>Public</b>                   | 20 | 11 | 11 | 0 | 20 (20, 20) | 100.0 (100.0, 100.0) | 55 (33.2, 76.8)   | 45   |       |
| <b>Serogrup</b>                 |    |    |    |   |             |                      |                   |      |       |
| <b>B</b>                        | 17 | 9  | 9  | 0 | 17 (17, 17) | 100.0 (100.0, 100.0) | 52.9 (29.2, 76.7) | 47.1 | 0.332 |
| <b>C</b>                        | 4  | 1  | 1  | 0 | 4 (4, 4)    | 100.0 (100.0, 100.0) | 25.0 (0.0, 67.4)  | 75.0 |       |

SDR: Statutory disease reporting; MDR: Microbiological reporting system
